# Supplementary material for: Iodine-catalyzed cyclization–allylation of N-allyl-2-alkynylanilines via an iodocyclization–rearrangement–deiodination sequence
Source: Royal Society of Chemistry journal article supplement (doi:10.1039/d3qo00315a), 2023-01-01

## Supplementary Information

### Iodine-Catalyzed Cyclization-Allylation of *N*-Allyl-2-alkynylanilines via Iodocyclization-Rearrangement-Deiodination Sequence

Sae Tsubata, Akira Tsubouchi and Akio Saito\*

Division of Applied Chemistry, Institute of Engineering, Tokyo University of Agriculture and Technology, Koganei, Tokyo 184-8588, Japan.

\* Correspondence: akio-sai@cc.tuat.ac.jp; Tel.: +81-42-388-7667

#### *Table of contents*

1. Optimization of Reaction Conditions (Table S1).....S1
2. General Information.....S2
3. Preparation and Characterization of *N,N*-Disubstituted *o*-Alkynylanilines **1**.....S2
4. Preparation and Characterization of 3-Allylindoles **2** and **4**.....S5
5. <sup>1</sup>H and <sup>13</sup>C NMR Spectra of **1b-1q**, **2a-2f**, **2h-2q**, **4p** and **4q**.....S10

## 1. Optimization of Reaction Conditions

Table S1. Evaluation of iodine catalysts, additives and solvents

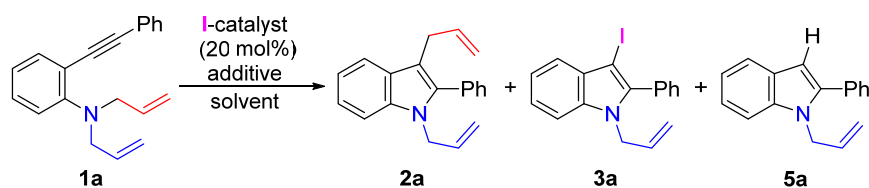

| entry | I-catalyst                                    | additive (equiv.)                        | Solvent           | (°C) | (h) | 2a <sup>a</sup> (%) | 3a <sup>a</sup> (%) | 5a <sup>a</sup> (%) | 1a <sup>a</sup> (%) |
|-------|-----------------------------------------------|------------------------------------------|-------------------|------|-----|---------------------|---------------------|---------------------|---------------------|
| 1     | I <sub>2</sub>                                |                                          | DCE               | 60   | 24  | 9                   | 19                  | trace               | 58                  |
| 2     | I <sub>2</sub>                                |                                          | toluene           | 60   | 24  | 2                   | 15                  | 0                   | 74                  |
| 3     | I <sub>2</sub>                                |                                          | MeCN              | 60   | 24  | 17                  | 6                   | 9                   | 13                  |
| 4     | I <sub>2</sub>                                |                                          | DMF               | 60   | 24  | 28                  | 7                   | 10                  | 21                  |
| 5     | I <sub>2</sub>                                |                                          | DMP               | 60   | 24  | 44                  | 5                   | 20                  | 10                  |
| 6     | I <sub>2</sub>                                |                                          | MeNO <sub>2</sub> | 60   | 24  | 41                  | 4                   | 12                  | 6                   |
| 7     | I <sub>2</sub>                                |                                          | MeNO <sub>2</sub> | 0/40 | 24  | 49                  | ND                  | 15                  | 16                  |
| 8     | I <sub>2</sub>                                |                                          | MeNO <sub>2</sub> | rt   | 24  | 29                  | 8                   | 0                   | 53                  |
| 9     | I <sub>2</sub>                                | NMP (5.2)                                | MeNO <sub>2</sub> | 40   | 24  | 62                  | 14                  | 14                  | 0                   |
| 10    | NIS                                           |                                          | MeNO <sub>2</sub> | 60   | 24  | 33                  | ND                  | 0                   | 49                  |
| 11    | ICl                                           |                                          | MeNO <sub>2</sub> | 60   | 24  | 48                  | trace               | 13                  | 0                   |
| 12    | Py <sub>2</sub> IBF <sub>4</sub>              |                                          | MeNO <sub>2</sub> | 60   | 24  | 50                  | trace               | 16                  | 0                   |
| 13    | Py <sub>2</sub> IBF <sub>4</sub>              |                                          | MeNO <sub>2</sub> | 40   | 24  | 30                  | 0                   | 6                   | 36                  |
| 14    | -                                             | HBF <sub>4</sub> ·OEt <sub>2</sub> (0.2) | MeNO <sub>2</sub> | 40   | 24  | 4                   | 0                   | 0                   | 90                  |
| 15    | Py <sub>2</sub> IBF <sub>4</sub>              | HBF <sub>4</sub> ·OEt <sub>2</sub> (0.2) | MeNO <sub>2</sub> | 40   | 24  | 69                  | 6                   | 3                   | 0                   |
| 16    | Py <sub>2</sub> IBF <sub>4</sub>              | HBF <sub>4</sub> ·OEt <sub>2</sub> (0.2) | Toluene           | 40   | 24  | 8                   | 2                   | ND                  | ND                  |
| 17    | Py <sub>2</sub> IBF <sub>4</sub>              | HBF <sub>4</sub> ·OEt <sub>2</sub> (0.2) | THF               | 40   | 24  | 50                  | ND                  | ND                  | ND                  |
| 18    | Py <sub>2</sub> IBF <sub>4</sub>              | HBF <sub>4</sub> ·OEt <sub>2</sub> (0.2) | MeCN              | 40   | 24  | 38                  | 4                   | 6                   | 42                  |
| 19    | Py <sub>2</sub> IBF <sub>4</sub>              | HBF <sub>4</sub> ·OEt <sub>2</sub> (0.2) | MeCN              | 40   | 48  | 66                  | 5                   | ND                  | 9                   |
| 20    | Py <sub>2</sub> IBF <sub>4</sub>              | HBF <sub>4</sub> ·OEt <sub>2</sub> (0.2) | DCE               | 40   | 24  | 45                  | 5                   | ND                  | 44                  |
| 21    | Py <sub>2</sub> IBF <sub>4</sub>              | HBF <sub>4</sub> ·OEt <sub>2</sub> (0.2) | DCM               | 40   | 48  | 40                  | 4                   | 2                   | 30                  |
| 22    | Py <sub>2</sub> IBF <sub>4</sub> <sup>b</sup> | HBF <sub>4</sub> ·OEt <sub>2</sub> (0.3) | DCM               | 40   | 24  | 54                  | 10                  | ND                  | 19                  |

DCE = 1,2-dichloroethane, DMF = *N,N*-dimethylformamide, DMP = *N*-methylpyrrolidone, THF = tetrahydrofuran, DCM = dichloromethane, Py = pyridine.

<sup>a</sup> Determined by <sup>1</sup>H NMR analysis using an internal standard. ND = Not determined. <sup>b</sup> 30 mol%.

## 2. General Information

All reactions were carried out under an argon atmosphere. According to procedures reported in the literatures, *o*-alkynylanilines **1a** were prepared.<sup>1</sup> Molecular iodine, Iodine monochloride, *N*-iodosuccinimide (NIS), Barluenga's reagent (Py<sub>2</sub>IBF<sub>4</sub>, Py = pyridine) and HBF<sub>4</sub>·OEt<sub>2</sub> are commercially available. All solvents were purchased as the "anhydrous" and used without further purification. For the thin-layer chromatography (TLC) analysis, Merck precoated TLC plates (silica gel 60 F<sub>254</sub>) were used. Column chromatography was performed on silica gel 60N (63–200 μm, neutral, Kanto Kagaku Co., Ltd.). Preparative thin layer chromatography (PTLC) was performed on Wakogel® B-5F (FUJIFILM Wako Pure Chemical Corp.). Medium pressure liquid chromatography (MPLC) was carried out with YAMAZEN EPCLC-Wprep 2XY.

<sup>1</sup>H and <sup>13</sup>C NMR spectra were measured at 500 and 125 MHz in CDCl<sub>3</sub> and the chemical shifts are given in ppm using CHCl<sub>3</sub> (7.26 ppm) in CDCl<sub>3</sub> for <sup>1</sup>H NMR and CDCl<sub>3</sub> (77.0 ppm) for <sup>13</sup>C NMR as an internal standard, respectively. <sup>19</sup>F NMR spectra were measured at 470 MHz in CD<sub>3</sub>Cl and the chemical shifts are given in ppm using C<sub>6</sub>F<sub>6</sub> (-162.90 ppm) as an internal standard. Splitting patterns of an apparent multiplet associated with an averaged coupling constant were designed as s (singlet), d (doublet), t (triplet), q (quartet), m (multiplet), and br (broadened). Mass spectra and HRMS were recorded on double-focusing magnetic sector by FAB or ESI methods.

## 3. Preparation and Characterization of *N,N*-disubstituted *o*-alkynylanilines **1**

General procedure A (GP-A)

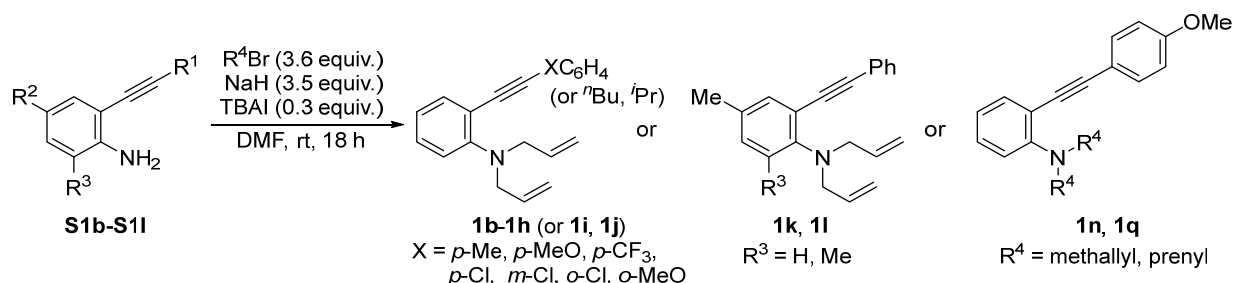

To a suspension of NaH (60% in oil, 3.5 equiv.) in DMF was added **S1b-S1l**<sup>2</sup> (0.985–8.11 mmol) in DMF at 0 °C. After being stirred for 30 min at ambient temperature, allylic bromide R<sup>4</sup>Br (R<sup>4</sup> = allyl, methallyl or prenyl, 3.6 equiv.) and tetrabutylammonium iodide (0.3 equiv.) was added. After being stirred at ambient temperature for 18h, the reaction mixture was quenched with sat. NH<sub>4</sub>Cl aq. and 20 wt% Na<sub>2</sub>S<sub>2</sub>O<sub>3</sub> aq., and extracted with AcOEt. The organic layer was dried over MgSO<sub>4</sub> and concentrated in vacuo to dryness. In the reaction with **S1b**, **S1h** and **S1i**, since NMR analysis of the crude products indicated that the monoallylated products still remained, the crude products were treated with allyl bromide (1.2 equiv.) in a same manner to complete the allylation. The residue was purified by silica gel column chromatography (hexane:CH<sub>2</sub>Cl<sub>2</sub> = 10:1) to give **1b-1l**, **1n** and **1q**.

General procedure B (GP-B)

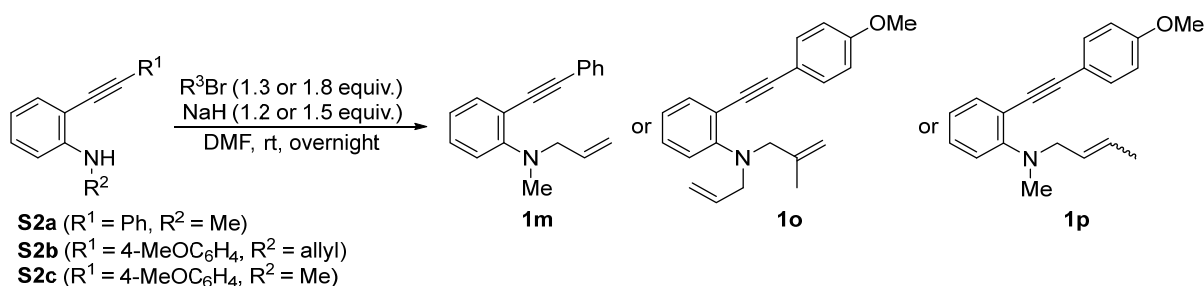

To a suspension of NaH (60% in oil, 1.5 equiv. for **S2a** and **S2c** or 1.2 equiv. for **S2b**) in DMF was added **S2a-S2c**<sup>3</sup> (1.64–3.14 mmol) in DMF at 0 °C. After being stirred for 30 min at ambient temperature, allylic bromide R<sup>3</sup>Br (R<sup>3</sup> = allyl or crotyl, 1.8 equiv.; R<sup>3</sup> = methallyl, 1.3 equiv.) was added 0 °C. After being stirred at ambient temperature overnight, the reaction mixture was quenched with sat. NH<sub>4</sub>Cl aq. and extracted with AcOEt. The organic layer was dried over MgSO<sub>4</sub> and concentrated in vacuo to dryness. The residue was purified by silica gel column chromatography (hexane:CH<sub>2</sub>Cl<sub>2</sub> = 10:1) to give **1m**, **1o**

<sup>1</sup> S.-L. Niu, J. Hu, K. He, Y.-C. Chen and Q. Xiao, *Org. Lett.*, **2019**, *21*, 4250–4254.

<sup>2</sup> (a) C. Peng, Y. Wang, L. Liu, H. Wang, J. Zhao and Q. Zhu, *Eur. J. Org. Chem.*, **2010**, 818–822. (b) H. Liang, G. Zhu, X. Pu and L. Qiu, *Org. Lett.*, **2021**, *23*, 9246–9250. (c) A. S. K. Raj, A. S. Narode and R.-S. Liu, *Org. Lett.*, **2021**, *23*, 1378–1382. (d) J. I. Murray, N. J. Flodén, A. Bauer, N. D. Fessner, D. L. Dunklemaun, O. Bob-Egbe, H. S. Rzepa, T. Bürgi, J. Richardson and A. C. Spivey, *Angew. Chem. Int. Ed.*, **2017**, *56*, 5760–5764.

<sup>3</sup> (a) L. Zhou, X. Liu, H. Lu, G. Deng, Y. Liang, Y. Yang and J.-H. Li, *Org. Chem. Front.*, **2021**, *8*, 5092–5097. (b) M. Mandal and R. Balamurugan, *Chem. Commun.*, **2022**, *58*, 9778–9781.

and **1p**.

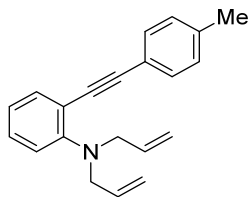

**N,N-Diallyl-2-(p-tolyethynyl)aniline (1b)**: 85% (1.34 g from **S1b** 1.14 g, GP-A).  $R_f = 0.35$  (hexane: AcOEt = 20:1). Yellow oil. IR (neat)  $\nu$   $\text{cm}^{-1}$ ; 2209, 1591, 1511, 1485, 1441, 1276, 1216.  $^1\text{H-NMR}$  (500 MHz,  $\text{CDCl}_3$ )  $\delta$  ppm; 7.56-7.52 (m, 2H), 7.39-7.30 (m, 4H), 7.04 (dd,  $J = 8.0, 1.7$  Hz, 1H), 6.86 (d,  $J = 8.6$  Hz, 1H), 5.92 (ddt,  $J = 17.2, 10.3, 5.5$  Hz, 2H), 5.25 (dd,  $J = 17.2, 1.7$  Hz, 2H), 5.17 (dd,  $J = 10.3, 1.7$  Hz, 2H), 3.94 (d,  $J = 5.5$  Hz, 4H), 2.29 (s, 3H).  $^{13}\text{C-NMR}$  (125 MHz,  $\text{CDCl}_3$ )  $\delta$  ppm; 150.1, 135.4, 134.6, 131.4, 130.1, 129.6, 128.2, 127.8, 123.9, 119.7, 117.1, 115.9, 94.0, 88.9, 54.6, 20.3. HRMS (ESI):  $m/z$  calcd. for  $\text{C}_{21}\text{H}_{22}\text{N}^+$   $[\text{M}+\text{H}]^+$  288.1747; found 288.1750.

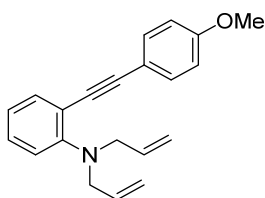

**N,N-Diallyl-2-[(4-methoxyphenyl)ethynyl]aniline (1c)**: 43% (1.06 g from **S1c** 1.81 g, GP-A).  $R_f = 0.28$  (hexane: AcOEt = 20:1). Yellow solid. Mp 43-44 °C. IR (KBr)  $\nu$   $\text{cm}^{-1}$ ; 2208, 1590, 1513, 1490, 1413, 1288, 1248, 1223, 1032.  $^1\text{H-NMR}$  (500 MHz,  $\text{CDCl}_3$ )  $\delta$  ppm; 7.49-7.44 (m, 3H), 7.19 (ddd,  $J = 7.3, 7.3, 1.7$  Hz, 1H), 6.92 (d,  $J = 8.0$  Hz, 1H), 6.90-6.84 (m, 3H), 5.91 (ddt,  $J = 17.2, 10.3, 6.3$  Hz, 2H), 5.23 (dd,  $J = 17.2, 1.7$  Hz, 2H), 5.17 (dd,  $J = 10.3, 1.7$  Hz, 2H), 3.97 (d,  $J = 6.3$  Hz, 4H), 3.83 (s, 3H).  $^{13}\text{C-NMR}$  (125 MHz,  $\text{CDCl}_3$ )  $\delta$  ppm; 159.3, 152.2, 135.3, 134.3, 132.8, 128.5, 120.5, 119.3, 117.2, 116.0, 115.8, 113.9, 94.3, 87.5, 55.3, 54.2. HRMS (ESI):  $m/z$  calcd. for  $\text{C}_{21}\text{H}_{22}\text{NO}^+$   $[\text{M}+\text{H}]^+$  304.1696; found 304.1703.

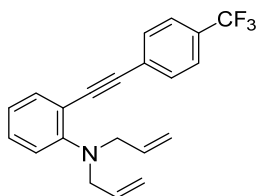

**N,N-Diallyl-2-[[4-(trifluoromethyl)phenyl]ethynyl]aniline (1d)**: 79% (1.78 g from **S1d** 1.72 g, GP-A).  $R_f = 0.30$  (hexane: AcOEt = 20:1). Yellow oil. IR (neat)  $\nu$   $\text{cm}^{-1}$ ; 2211, 1614, 1593, 1486, 1416, 1321, 1277, 1219.  $^1\text{H-NMR}$  (500 MHz,  $\text{CDCl}_3$ )  $\delta$  ppm; 7.65-7.58 (m, 4H), 7.51 (dd,  $J = 7.6, 1.7$  Hz, 1H), 7.25 (ddd,  $J = 8.2, 7.5, 1.7$  Hz, 1H), 6.95 (d,  $J = 8.2$  Hz, 1H), 6.89 (ddd,  $J = 7.6, 7.5, 1.2$  Hz, 1H), 5.91 (ddt,  $J = 17.2, 10.3, 5.7$  Hz, 2H), 5.26 (dd,  $J = 17.2, 1.7$  Hz, 2H), 5.20 (dd,  $J = 10.3, 1.7$  Hz, 2H), 3.98 (d,  $J = 5.7$  Hz, 4H).  $^{13}\text{C-NMR}$  (125 MHz,  $\text{CDCl}_3$ )  $\delta$  ppm; 152.6, 135.0, 134.7, 131.5, 129.48 (q,  $^2J_{\text{C-F}} = 32.4$  Hz), 129.46, 127.7, 125.2 (q,  $^3J_{\text{C-F}} = 3.6$  Hz), 124.0 (q,  $^1J_{\text{C-F}} = 272.3$  Hz), 120.4, 119.2, 117.3, 114.4, 92.8, 91.6, 54.3.  $^{19}\text{F-NMR}$  (470 MHz,  $\text{CD}_3\text{Cl}$ )  $\delta$  ppm; -63.9 (s, 3F). HRMS (ESI):  $m/z$  calcd. for  $\text{C}_{21}\text{H}_{19}\text{F}_3\text{N}^+$   $[\text{M}+\text{H}]^+$  342.1464; found 342.1465.

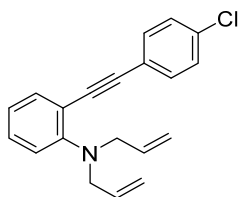

**N,N-Diallyl-2-[(4-chlorophenyl)ethynyl]aniline (1e)**: 81% (1.30 g from **S1e** 1.19 g, GP-A).  $R_f = 0.28$  (hexane: AcOEt = 20:1). Yellow oil. IR (neat)  $\nu$   $\text{cm}^{-1}$ ; 2212, 1592, 1492, 1470, 1439, 1416, 1277, 1218, 1054.  $^1\text{H-NMR}$  (500 MHz,  $\text{CDCl}_3$ )  $\delta$  ppm; 7.50 (dd,  $J = 7.5, 1.7$  Hz, 1H), 7.46 (d,  $J = 8.6$  Hz, 2H), 7.33 (d,  $J = 8.6$  Hz, 2H), 7.24 (ddd,  $J = 7.5, 7.5, 1.7$  Hz, 1H), 6.95 (d,  $J = 7.5$  Hz, 1H), 6.90 (dd,  $J = 7.5, 7.5$  Hz, 1H), 5.92 (ddt,  $J = 17.2, 9.7, 5.7$  Hz, 2H), 5.26 (dd,  $J = 17.2, 1.7$  Hz, 2H), 5.20 (d,  $J = 9.7, 1.7$  Hz, 2H), 3.99 (d,  $J = 5.7$  Hz, 4H).  $^{13}\text{C-NMR}$  (125 MHz,  $\text{CDCl}_3$ )  $\delta$  ppm; 152.4, 135.1, 134.5, 133.8, 132.5, 129.1, 128.6, 122.4, 120.4, 119.2, 117.3, 114.9, 93.1, 90.0, 54.2. HRMS (ESI):  $m/z$  calcd. for  $\text{C}_{20}\text{H}_{19}\text{ClN}^+$   $[\text{M}+\text{H}]^+$  308.1201; found 308.1209.

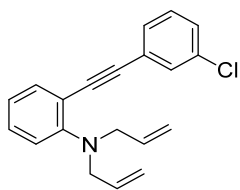

**N,N-Diallyl-2-[(3-chlorophenyl)ethynyl]aniline (1f)**: 83% (1.77 g from **S1f** 1.57 g, GP-A).  $R_f = 0.33$  (hexane: AcOEt = 20:1). Yellow oil. IR (neat)  $\nu$   $\text{cm}^{-1}$ ; 2217, 1591, 1491, 1473, 1440, 1416, 1276, 1218, 1089.  $^1\text{H-NMR}$  (500 MHz,  $\text{CDCl}_3$ )  $\delta$  ppm; 7.53 (d,  $J = 1.4$  Hz, 1H), 7.50 (ddd,  $J = 7.7, 1.4, 1.4$  Hz, 1H), 7.41 (ddd,  $J = 7.2, 1.4, 1.4$  Hz, 1H), 7.34-7.27 (m, 2H), 7.24 (ddd,  $J = 7.2, 1.4, 1.4$  Hz, 1H), 6.95 (d,  $J = 8.3$  Hz, 1H), 6.90 (dd,  $J = 7.5, 7.5$  Hz, 1H), 5.92 (ddt,  $J = 17.2, 10.3, 6.0$  Hz, 2H), 5.27 (ddt,  $J = 17.2, 1.4$  Hz, 2H), 5.21 (ddt,  $J = 10.3, 1.4$  Hz, 2H), 3.99 (d,  $J = 6.0$  Hz, 4H).  $^{13}\text{C-NMR}$  (125 MHz,  $\text{CDCl}_3$ )  $\delta$  ppm; 152.5, 135.0, 134.6, 134.1, 131.1, 129.5, 129.2, 128.1, 125.6, 120.4, 119.2, 117.3, 114.7, 92.8, 90.3, 54.2 (note that two carbon peaks overlap with each other). HRMS (ESI):  $m/z$  calcd. for  $\text{C}_{20}\text{H}_{19}\text{ClN}^+$   $[\text{M}+\text{H}]^+$  308.1201; found 308.1207.

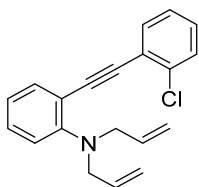

**N,N-Diallyl-2-[(2-chlorophenyl)ethynyl]aniline (1g)**: 97% (1.57 g from **S1g** 1.20 g, GP-A).  $R_f = 0.30$  (hexane: AcOEt = 20:1). Yellow oil. IR (neat)  $\nu$   $\text{cm}^{-1}$ ; 2213, 1593, 1491, 1470, 1439, 1416, 1277, 1217, 1053.  $^1\text{H-NMR}$  (500 MHz,  $\text{CDCl}_3$ )  $\delta$  ppm; 7.59-7.53 (m, 2H), 7.46-7.41 (m, 1H), 7.28-7.22 (m, 3H), 6.94 (d,  $J = 7.5$  Hz, 1H), 6.90 (ddd,  $J = 7.5, 7.5, 1.2$  Hz, 1H), 5.90 (ddt,  $J = 17.2, 10.3, 5.7$  Hz, 2H), 5.23 (dd,  $J = 17.2, 1.7$  Hz, 2H), 5.17 (dd,  $J = 10.3, 1.7$  Hz, 2H), 4.01 (d,  $J = 5.7$  Hz, 4H).  $^{13}\text{C-NMR}$  (125 MHz,  $\text{CDCl}_3$ )  $\delta$  ppm; 152.3, 135.6, 135.0, 134.8, 133.0, 129.3, 129.2, 128.9, 126.4, 123.8, 120.4, 119.4, 117.2, 115.0, 94.1, 91.1, 54.3. HRMS (ESI):  $m/z$  calcd. for  $\text{C}_{20}\text{H}_{19}\text{ClN}^+$   $[\text{M}+\text{H}]^+$  308.1201; found 308.1202.

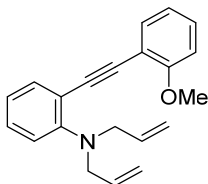

**N,N-Diallyl-2-[(2-methoxyphenyl)ethynyl]aniline (1h)**: 66% (0.477 g from **S1h** 0.534 g, GP-A).  $R_f = 0.26$  (hexane: AcOEt = 20:1). Yellow oil. IR (neat)  $\nu$   $\text{cm}^{-1}$ ; 2208, 1591, 1496, 1484, 1434, 1274, 1247, 1217, 1025.  $^1\text{H-NMR}$  (500 MHz,  $\text{CDCl}_3$ )  $\delta$  ppm; 7.52 (dd,  $J = 7.5, 1.7$  Hz, 1H), 7.49 (dd,  $J = 7.5, 1.7$  Hz, 1H), 7.29 (ddd,  $J = 7.5, 7.5, 1.7$  Hz, 1H), 7.20 (ddd,  $J = 8.6, 7.5, 1.7$  Hz, 1H), 6.96-6.86 (m, 4H), 5.92 (ddt,  $J = 17.2, 10.3, 5.7$  Hz, 2H), 5.22 (dd,  $J = 17.2, 1.7$  Hz, 2H), 5.15 (dd,  $J = 10.3, 1.7$  Hz, 2H), 4.01 (d,  $J = 5.7$  Hz, 4H), 3.90 (s, 3H).  $^{13}\text{C-NMR}$  (125 MHz,  $\text{CDCl}_3$ )  $\delta$

ppm; 159.8, 152.2, 135.4, 134.6, 133.2, 129.3, 128.7, 120.4, 119.4, 117.0, 115.9, 113.1, 110.6, 92.9, 90.8, 55.6, 54.2 (note that two carbon peaks overlap with each other). HRMS (ESI):  $m/z$  calcd. for  $C_{21}H_{22}NO^+$   $[M+H]^+$  304.1696; found 304.1696.

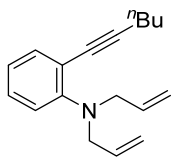

***N,N*-Diallyl-2-(hex-1-yn-1-yl)aniline (1i)**: 62% (0.902 g from **S1i** 1.00 g, GP-A).  $R_f$  = 0.29 (hexane:AcOEt = 20:1). Yellow oil. IR (neat)  $\nu$   $cm^{-1}$ ; 2227, 1612, 1508, 1464, 1431, 1252, 1179.  $^1H$ -NMR (500 MHz,  $CDCl_3$ )  $\delta$  ppm; 7.37 (dd,  $J$  = 7.4, 1.7 Hz, 1H), 7.16 (ddd,  $J$  = 8.0, 7.4, 1.7 Hz, 1H), 6.89 (d,  $J$  = 8.0 Hz, 1H), 6.84 (ddd,  $J$  = 7.4, 7.4, 1.2 Hz, 1H), 5.87 (ddt,  $J$  = 17.4, 10.3, 5.7 Hz, 2H), 5.21 (dd,  $J$  = 17.4, 1.4 Hz, 2H), 5.16 (dd,  $J$  = 10.3, 1.4 Hz, 2H), 3.91 (d,  $J$  = 5.7 Hz, 4H), 2.48 (t,  $J$  = 7.2 Hz, 2H), 1.67-1.58 (m, 2H), 1.55-1.46 (m, 2H), 0.96 (t,  $J$  = 7.4 Hz, 3H).  $^{13}C$ -NMR (125 MHz,  $CDCl_3$ )  $\delta$  ppm; 152.3, 135.4, 134.3, 127.9, 120.6, 119.5, 117.0, 116.9, 95.5, 79.6, 54.2, 30.9, 22.1, 19.6, 13.7. HRMS (ESI):  $m/z$  calcd. for  $C_{18}H_{24}N^+$   $[M+H]^+$  254.1903; found 254.1905.

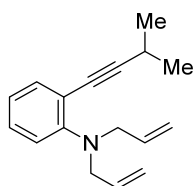

***N,N*-Diallyl-2-(3-methylbut-1-yn-1-yl)aniline (1j)**: 61% (0.734 g from **S1j** 0.796 g, GP-A).  $R_f$  = 0.41 (hexane:AcOEt = 20:1). Colorless oil. IR (neat)  $\nu$   $cm^{-1}$ ; 2224, 1592, 1488, 1442, 1411, 1321, 1214.  $^1H$ -NMR (500 MHz,  $CDCl_3$ )  $\delta$  ppm; 7.37 (dd,  $J$  = 7.4, 1.7 Hz, 1H), 7.16 (ddd,  $J$  = 7.9, 7.6, 1.7 Hz, 1H), 6.89 (d,  $J$  = 7.9 Hz, 1H), 6.83 (dd,  $J$  = 7.6, 7.4 Hz, 1H), 5.88 (ddt,  $J$  = 17.4, 10.3, 6.0 Hz, 2H), 5.22 (dd,  $J$  = 17.4, 1.4 Hz, 2H), 5.16 (dd,  $J$  = 10.3, 1.4 Hz, 2H), 3.91 (d,  $J$  = 6.0 Hz, 4H), 2.84 (septet,  $J$  = 6.9 Hz, 1H), 1.29 (d,  $J$  = 6.9 Hz, 6H).  $^{13}C$ -NMR (125 MHz,  $CDCl_3$ )  $\delta$  ppm; 152.2, 135.4, 134.4, 127.9, 120.5, 119.4, 116.9, 116.6, 100.7, 78.9, 54.0, 23.0, 21.5. HRMS (ESI):  $m/z$  calcd. for  $C_{17}H_{22}N^+$   $[M+H]^+$  240.1747; found 240.1751.

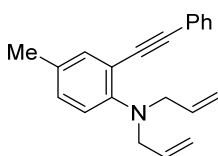

***N,N*-Diallyl-4-methyl-2-(phenylethynyl)aniline (1k)**: 87% (1.25 g from **S1k** 1.04 g, GP-A).  $R_f$  = 0.33 (hexane:AcOEt = 20:1). Yellow oil. IR (neat)  $\nu$   $cm^{-1}$ ; 2202, 1598, 1499, 1488, 1442, 1416, 1277, 1216.  $^1H$ -NMR (500 MHz,  $CDCl_3$ )  $\delta$  ppm; 7.57-7.53 (m, 2H), 7.39-7.30 (m, 4H), 7.04 (dd,  $J$  = 8.3, 1.7 Hz, 1H), 6.86 (d,  $J$  = 8.3 Hz, 1H), 5.92 (ddt,  $J$  = 17.2, 10.3, 5.7 Hz, 2H), 5.25 (dd,  $J$  = 17.2, 1.7 Hz, 2H), 5.17 (dd,  $J$  = 10.3, 1.7 Hz, 2H), 3.94 (d,  $J$  = 5.7 Hz, 4H), 2.29 (s, 3H).  $^{13}C$ -NMR (125 MHz,  $CDCl_3$ )  $\delta$  ppm; 150.1, 135.4, 134.6, 131.4, 130.1, 129.6, 128.3, 127.9, 123.9, 119.7, 117.1, 115.9, 94.0, 88.9, 54.6, 20.3. HRMS (ESI):  $m/z$  calcd. for  $C_{21}H_{22}N^+$   $[M+H]^+$  288.1747; found 288.1751.

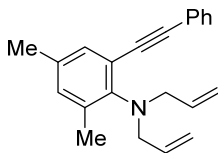

***N,N*-Diallyl-2,4-dimethyl-6-(phenylethynyl)aniline (1l)**: 71% (1.10 g from **S1l** 1.13 g, GP-A).  $R_f$  = 0.35 (hexane:AcOEt = 20:1). Yellow oil. IR (neat)  $\nu$   $cm^{-1}$ ; 2208, 1598, 1492, 1472, 1442, 1415, 1268, 1216.  $^1H$ -NMR (500 MHz,  $CDCl_3$ )  $\delta$  ppm; 7.59-7.55 (m, 2H), 7.42-7.33 (m, 3H), 7.18 (d,  $J$  = 2.3 Hz, 1H), 7.01 (s, 1H), 5.90 (ddt,  $J$  = 17.1, 10.5, 6.3 Hz, 2H), 5.18 (dd,  $J$  = 17.1, 1.7 Hz, 2H), 5.04 (dd,  $J$  = 10.5, 1.7 Hz, 2H), 3.87 (d,  $J$  = 6.3 Hz, 4H), 2.32 (s, 3H), 2.28 (s, 3H).  $^{13}C$ -NMR (125 MHz,  $CDCl_3$ )  $\delta$  ppm; 148.5, 137.8, 136.7, 134.1, 132.04, 132.00, 131.0, 128.4, 128.0, 123.9, 122.0, 116.2, 93.1, 89.5, 56.2, 20.6, 18.9. HRMS (ESI):  $m/z$  calcd. for  $C_{22}H_{24}N^+$   $[M+H]^+$  302.1903; found 302.1911.

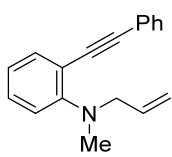

***N*-Allyl-*N*-methyl-2-(phenylethynyl)aniline (1m)**: 96% (0.420 g from **S2a** 0.368 g, GP-B).  $R_f$  = 0.31 (hexane:AcOEt = 20:1). Yellow oil. IR (neat)  $\nu$   $cm^{-1}$ ; 2209, 1590, 1496, 1482, 1443, 1276, 1228, 1185.  $^1H$ -NMR (500 MHz,  $CDCl_3$ )  $\delta$  ppm; 7.57-7.53 (m, 2H), 7.51 (dd,  $J$  = 8.0, 1.7 Hz, 1H), 7.38-7.30 (m, 3H), 7.26 (ddd,  $J$  = 7.7, 7.7, 1.7 Hz, 1H), 6.95 (d,  $J$  = 7.7 Hz, 1H), 6.91 (ddd,  $J$  = 7.7, 7.7, 1.2 Hz, 1H), 6.03 (ddt,  $J$  = 17.2, 10.3, 6.3 Hz, 1H), 5.29 (ddt,  $J$  = 17.2, 1.7 Hz, 1H), 5.21 (dd,  $J$  = 10.3, 1.7 Hz, 1H), 3.99 (d,  $J$  = 6.3 Hz, 2H), 2.87 (s, 3H).  $^{13}C$ -NMR (125 MHz,  $CDCl_3$ )  $\delta$  ppm; 153.9, 135.6, 134.4, 131.4, 129.2, 128.3, 127.9, 123.8, 120.4, 117.7, 117.3, 115.1, 94.6, 88.7, 59.2, 38.8. HRMS (ESI):  $m/z$  calcd. for  $C_{18}H_{18}N^+$   $[M+H]^+$  248.1434; found 248.1435.

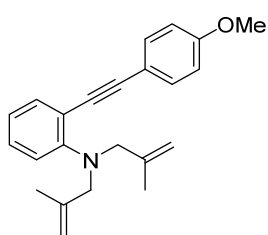

**2-[(4-Methoxyphenyl)ethynyl]-*N,N*-bis(2-methylallyl)aniline (1n)**: 83% (0.271 g from **S1c** 0.220 g, GP-A).  $R_f$  = 0.29 (hexane:AcOEt = 20:1). Yellow oil. IR (neat)  $\nu$   $cm^{-1}$ ; 2211, 1606, 1512, 1486, 1441, 1287, 1249, 1214, 1033.  $^1H$ -NMR (500 MHz,  $CDCl_3$ )  $\delta$  ppm; 7.48 (dd,  $J$  = 7.5, 1.6 Hz, 1H), 7.46 (d,  $J$  = 8.9 Hz, 2H), 7.20 (ddd,  $J$  = 7.9, 7.5, 1.6 Hz, 1H), 6.94 (d,  $J$  = 7.9 Hz, 1H), 6.90 (d,  $J$  = 8.9 Hz, 2H), 6.88 (dd,  $J$  = 7.5, 7.5 Hz, 1H), 4.99 (s, 2H), 4.90 (s, 2H), 3.90 (s, 4H), 3.84 (s, 3H), 1.74 (s, 6H).  $^{13}C$ -NMR (125 MHz,  $CDCl_3$ )  $\delta$  ppm; 159.3, 152.5, 142.5, 134.3, 132.6, 128.4, 120.3, 119.5, 116.2, 115.7, 113.9, 112.3, 93.8, 87.7, 57.8, 55.2, 20.6. HRMS (ESI):  $m/z$  calcd. for  $C_{23}H_{26}NO^+$   $[M+H]^+$  332.2009; found 332.2010.

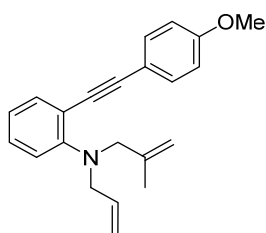

**N-Allyl-2-[(4-methoxyphenyl)ethynyl]-N-(2-methylallyl)aniline (10):** Quant. (0.532 g from **S2b** 0.432 g, GP-B).  $R_f = 0.29$  (hexane:AcOEt = 20:1). Yellow oil. IR (neat)  $\nu$   $\text{cm}^{-1}$ ; 2212, 1606, 1512, 1486, 1441, 1287, 1249, 1215, 1033.  $^1\text{H-NMR}$  (500 MHz,  $\text{CDCl}_3$ )  $\delta$  ppm; 7.47 (d,  $J = 7.6$  Hz, 1H), 7.45 (d,  $J = 8.6$  Hz, 2H), 7.19 (ddt,  $J = 7.9, 7.7, 1.2$  Hz, 1H), 6.92 (d,  $J = 7.9$  Hz, 1H), 6.88 (d,  $J = 8.6$  Hz, 2H), 6.87 (dd,  $J = 7.7, 7.6$  Hz, 1H), 5.91 (ddt,  $J = 17.2, 10.6, 6.0$  Hz, 1H), 5.20 (d,  $J = 17.2$  Hz, 1H), 5.15 (d,  $J = 10.6$  Hz, 1H), 4.98 (s, 1H), 4.90 (s, 1H), 3.98 (d,  $J = 6.0$  Hz, 2H), 3.83 (s, 5H), 1.73 (s, 3H).  $^{13}\text{C-NMR}$  (125 MHz,  $\text{CDCl}_3$ )  $\delta$  ppm; 159.3, 152.3, 142.4, 135.3, 134.2, 132.7, 128.4, 120.5, 119.6, 117.1, 116.2, 116.0, 113.9, 112.3, 94.0, 87.6, 57.1, 55.3, 54.9, 20.5. HRMS (ESI):  $m/z$  calcd. for  $\text{C}_{22}\text{H}_{24}\text{NO}^+$   $[\text{M}+\text{H}]^+$  318.1852; found 318.1850.

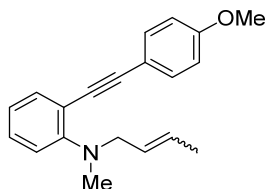

**N-(But-2-en-1-yl)-2-[(4-methoxyphenyl)ethynyl]-N-methylaniline (1p):** 96% (0.880 g from **S2c** 0.746 g, GP-B).  $R_f = 0.23$  (hexane:AcOEt = 20:1). Yellow oil. IR (neat)  $\nu$   $\text{cm}^{-1}$ ; 2210, 1606, 1512, 1487, 1447, 1287, 1248, 1175, 1032.  $^1\text{H-NMR}$  (500 MHz,  $\text{CDCl}_3$ , 83:17 mixture of geometrical isomers)  $\delta$  ppm; 7.51-7.45 (m, 3H), 7.25-7.19 (m, 1H), 6.96-6.91 (m, 1H), 6.90-6.85 (m, 3H), 5.73-5.61 (m, 2H), 4.02 (d,  $J = 4.0$  Hz, 0.34H), 3.89 (d,  $J = 4.0$  Hz, 1.66H), 3.83 (s, 3H), 2.85 (s, 0.51H), 2.83 (s, 2.49H), 1.71 (d,  $J = 4.0$  Hz, 2.49H), 1.67 (d,  $J = 5.2$  Hz, 0.51H).  $^{13}\text{C-NMR}$  (125 MHz,  $\text{CDCl}_3$ , 83:17 mixture of geometrical isomers)  $\delta$  ppm; 159.3, 153.9, 134.13, 134.06 (minor), 132.7, 128.8, 128.4, 128.2, 127.8 (minor), 126.8 (minor), 120.6 (minor), 120.3, 117.8 (minor), 117.6, 116.0, 116.0 (minor), 115.9 (minor), 115.5, 113.9, 94.7 (minor), 94.5, 87.4, 87.3 (minor), 58.4, 55.2, 53.4 (minor), 52.6 (minor), 39.0 (minor), 38.6, 17.8, 13.0 (minor) [note that five  $\text{sp}^2$  carbon peaks of the minor isomer overlap with the peaks of the major isomer]. HRMS (ESI):  $m/z$  calcd. for  $\text{C}_{20}\text{H}_{22}\text{NO}^+$   $[\text{M}+\text{H}]^+$  292.1696; found 292.1703.

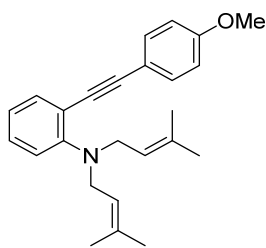

**2-[(4-Methoxyphenyl)ethynyl]-N,N-bis(3-methylbut-2-en-1-yl)aniline (1q):** 99% (1.80 g from **S1c** 1.13 g, GP-A).  $R_f = 0.31$  (hexane:AcOEt = 20:1). Yellow oil. IR (neat)  $\nu$   $\text{cm}^{-1}$ ; 2211, 1606, 1512, 1485, 1441, 1248, 1174.  $^1\text{H-NMR}$  (500 MHz,  $\text{CDCl}_3$ )  $\delta$  ppm; 7.49-7.44 (m, 3H), 7.18 (ddd,  $J = 7.7, 7.7, 1.7$  Hz, 1H), 6.90-6.83 (m, 4H), 5.32 (t,  $J = 6.3$  Hz, 2H), 3.89 (d,  $J = 6.3$  Hz, 4H), 3.83 (s, 3H), 1.71 (s, 6H), 1.64 (s, 6H).  $^{13}\text{C-NMR}$  (125 MHz,  $\text{CDCl}_3$ )  $\delta$  ppm; 159.3, 153.0, 134.2, 134.1, 132.8, 128.4, 122.3, 120.1, 119.1, 116.3, 116.1, 113.8, 94.3, 87.8, 55.3, 49.5, 25.8, 17.9. HRMS (ESI):  $m/z$  calcd. for  $\text{C}_{25}\text{H}_{30}\text{NO}^+$   $[\text{M}+\text{H}]^+$  360.2322; found 360.2319.

#### 4. Preparation and Characterization of 3-allylindoles 2 and 4

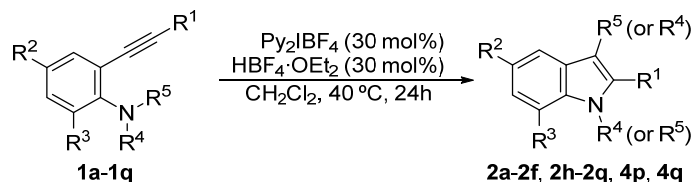

After Barluenga's reagent (30 mol%) was treated with  $\text{HBF}_4 \cdot \text{OEt}_2$  (30 mol%) in  $\text{CH}_2\text{Cl}_2$  (1.5 mL) at 0 °C for 15 min, a solution of **1a-1q** (0.49-0.60 mmol) in  $\text{CH}_2\text{Cl}_2$  (3.0 mL) was added at 0 °C. After being stirred at 40 °C for 24 h, the reaction mixture was quenched with sat.  $\text{NaHCO}_3$  aq. and 20 wt%  $\text{Na}_2\text{S}_2\text{O}_3$  aq., and extracted with AcOEt. The organic layer was dried over  $\text{MgSO}_4$  and concentrated in vacuo to dryness. The residue was purified by MPLC on silica gel modified with amino groups (hexane only) and by MPLC on silica gel modified with octadecylsilyl (ODS) groups ( $\text{MeCN}:\text{H}_2\text{O} = 9:1$  to 1:0) in turn to give **2a-2f**, **2h-2q**, **4p** and **4q**.

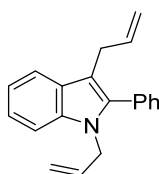

**1,3-Diallyl-2-phenyl-1H-indole (2a):** 53% (72.9 mg from **1a** 137.5 mg).  $R_f = 0.30$  (hexane:AcOEt = 20:1). Yellow solid.  $^1\text{H-NMR}$  (500 MHz,  $\text{CDCl}_3$ )  $\delta$  ppm; 7.66 (d,  $J = 8.0$  Hz, 1H), 7.51-7.46 (m, 2H), 7.46-7.41 (m, 3H), 7.34 (d,  $J = 8.0$  Hz, 1H), 7.25 (dd,  $J = 8.0, 6.9$  Hz, 1H), 7.17 (dd,  $J = 8.0, 6.9$  Hz, 1H), 6.05 (ddt,  $J = 17.2, 9.7, 5.2$  Hz, 1H), 5.93 (ddt,  $J = 16.9, 10.6, 4.6$  Hz, 1H), 5.15 (dd,  $J = 10.6, 1.7$  Hz, 1H), 5.08-5.01 (m, 2H), 4.93 (dd,  $J = 17.2, 1.2$  Hz, 1H), 4.62 (ddd,  $J = 4.6, 1.7, 1.7$  Hz, 2H), 3.47 (ddd,  $J = 5.2, 1.7, 1.7$  Hz, 2H).  $^{13}\text{C-NMR}$  (125 MHz,  $\text{CDCl}_3$ )  $\delta$  ppm; 138.0, 137.9, 136.7, 133.9, 131.8, 130.4, 128.3, 128.1, 128.0, 121.7, 119.34, 119.30, 116.2, 114.6, 110.9, 110.1, 46.4, 29.2.  $^1\text{H}$  and  $^{13}\text{C}$  NMR spectra of **2a** were identical with those reported in literature.<sup>4</sup>

<sup>4</sup> M. E. Kieffer, L. M. Repka and S. E. Reisman, *J. Am. Chem. Soc.*, **2012**, *134*, 5131–5137.

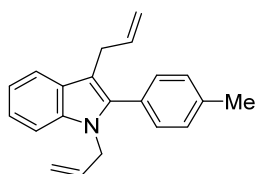

**1,3-Diallyl-2-(*p*-tolyl)-1H-indole (2b):** 58% (85.4 mg from **1b** 146.0 mg).  $R_f = 0.33$  (hexane: AcOEt = 20:1). Yellow solid. Mp 41-42 °C. IR (KBr)  $\nu$   $\text{cm}^{-1}$ ; 1462, 1435, 1415, 1358, 1189, 748.  $^1\text{H-NMR}$  (500 MHz,  $\text{CDCl}_3$ )  $\delta$  ppm; 7.64 (d,  $J = 8.0$  Hz, 1H), 7.33 (d,  $J = 8.0$  Hz, 1H), 7.32 (d,  $J = 8.0$  Hz, 2H), 7.28 (d,  $J = 8.0$  Hz, 2H), 7.23 (dd,  $J = 8.0, 6.9$  Hz, 1H), 7.15 (dd,  $J = 8.0, 6.9$  Hz, 1H), 6.09 (ddt,  $J = 16.6, 10.5, 5.2$  Hz, 1H), 5.92 (ddt,  $J = 16.6, 10.5, 5.2$  Hz, 1H), 5.14 (d,  $J = 10.5$  Hz, 1H), 5.06 (d,  $J = 16.6$  Hz, 1H), 5.02 (d,  $J = 10.5$  Hz, 1H), 4.93 (d,  $J = 16.6$  Hz, 1H), 4.64-4.59 (m, 2H), 3.46 (d,  $J = 5.2$  Hz, 2H), 2.45 (s, 3H).  $^{13}\text{C-NMR}$  (125 MHz,  $\text{CDCl}_3$ )  $\delta$  ppm; 138.1, 138.0, 137.9, 136.7, 134.0, 130.3, 129.0, 128.8, 128.1, 121.6, 119.3, 119.2, 116.2, 114.5, 110.7, 110.0, 46.4, 29.3, 21.3. HRMS (ESI):  $m/z$  calcd. for  $\text{C}_{21}\text{H}_{20}\text{N}^+$   $[\text{M-H}]^+$  286.1590; found 286.1594.

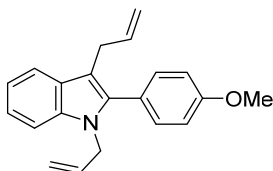

**1,3-Diallyl-2-(4-methoxyphenyl)-1H-indole (2c):** 60% (93.8 mg from **1c** 155.7 mg).  $R_f = 0.28$  (hexane: AcOEt = 20:1). Yellow solid. Mp 82-83 °C. IR (KBr)  $\nu$   $\text{cm}^{-1}$ ; 1508, 1464, 1431, 1362, 1250, 1179, 1028, 745.  $^1\text{H-NMR}$  (500 MHz,  $\text{CDCl}_3$ )  $\delta$  ppm; 7.61 (d,  $J = 8.0$  Hz, 1H), 7.33 (d,  $J = 8.6$  Hz, 2H), 7.30 (d,  $J = 8.0$  Hz, 1H), 7.21 (ddd,  $J = 8.0, 6.9, 1.2$  Hz, 1H), 7.13 (dd,  $J = 8.0, 6.9$  Hz, 1H), 6.99 (d,  $J = 8.6$  Hz, 2H), 6.02 (ddt,  $J = 17.0, 10.1, 6.0$  Hz, 1H), 5.91 (ddt,  $J = 17.0, 10.1, 4.6$  Hz, 1H), 5.12 (ddt,  $J = 10.1, 1.7, 1.7$  Hz, 1H), 5.03 (ddt,  $J = 17.0, 1.7, 1.7$  Hz, 1H), 5.00 (ddt,  $J = 10.1, 1.7, 1.7$  Hz, 1H), 4.90 (ddt,  $J = 17.0, 1.7, 1.7$  Hz, 1H), 4.59 (ddd,  $J = 4.6, 1.7, 1.7$  Hz, 2H), 3.87 (s, 3H), 3.43 (ddd,  $J = 6.0, 1.7, 1.7$  Hz, 2H).  $^{13}\text{C-NMR}$  (125 MHz,  $\text{CDCl}_3$ )  $\delta$  ppm; 159.5, 138.0, 137.8, 136.6, 134.0, 131.6, 128.0, 124.0, 121.5, 119.3, 119.2, 116.2, 114.5, 113.7, 110.6, 110.0, 55.3, 46.3, 29.3. HRMS (ESI):  $m/z$  calcd. for  $\text{C}_{21}\text{H}_{20}\text{NO}^+$   $[\text{M-H}]^+$  302.1539; found 302.1531.

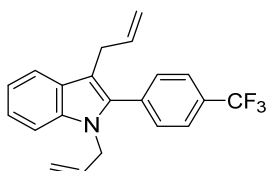

**1,3-Diallyl-2-[4-(trifluoromethyl)phenyl]-1H-indole (2d):** 31% (53.7 mg from **1d** 172.8 mg).  $R_f = 0.29$  (hexane: AcOEt = 20:1). Yellow solid. Mp 55-56 °C. IR (KBr)  $\nu$   $\text{cm}^{-1}$ ; 1462, 1436, 1420, 1361, 1327, 1161, 739.  $^1\text{H-NMR}$  (500 MHz,  $\text{CDCl}_3$ )  $\delta$  ppm; 7.73 (d,  $J = 8.0$  Hz, 2H), 7.65 (d,  $J = 8.0$  Hz, 1H), 7.55 (d,  $J = 8.0$  Hz, 2H), 7.33 (d,  $J = 8.0$  Hz, 1H), 7.27 (ddd,  $J = 8.0, 7.3, 1.2$  Hz, 1H), 7.17 (ddd,  $J = 8.0, 7.3, 1.2$  Hz, 1H), 6.04 (ddt,  $J = 17.6, 9.6, 5.7$  Hz, 1H), 5.92 (ddt,  $J = 17.2, 10.3, 4.6$  Hz, 1H), 5.16 (ddt,  $J = 10.3, 1.7, 1.7$  Hz, 1H), 5.05-5.00 (m, 2H), 4.90 (ddt,  $J = 17.2, 1.7, 1.7$  Hz, 1H), 4.61 (ddd,  $J = 4.6, 1.9, 1.9$  Hz, 2H), 3.44 (ddd,  $J = 5.7, 1.7, 1.7$  Hz, 2H).  $^{13}\text{C-NMR}$  (125 MHz,  $\text{CDCl}_3$ )  $\delta$  ppm; 137.5, 137.1, 136.3, 135.5, 133.7, 130.6, 130.0 (q,  $^2J_{\text{C-F}} = 32.5$  Hz), 127.9, 125.3 ( $^3J_{\text{C-F}} = 3.8$  Hz), 124.1 (q,  $^1J_{\text{C-F}} = 272.2$  Hz), 122.4, 119.7, 119.6, 116.4, 114.9, 111.9, 110.2, 46.5, 29.1.  $^{19}\text{F-NMR}$  (470 MHz,  $\text{CDCl}_3$ )  $\delta$  ppm; -63.7 (s, 3F). HRMS (ESI):  $m/z$  calcd. for  $\text{C}_{21}\text{H}_{17}\text{F}_3\text{N}^+$   $[\text{M-H}]^+$  340.1308; found 340.1304.

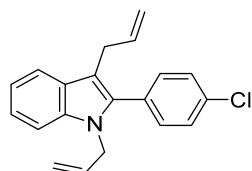

**1,3-Diallyl-2-(4-chlorophenyl)-1H-indole (2e):** 39% (60.0 mg from **1e** 155.7 mg).  $R_f = 0.29$  (hexane: AcOEt = 20:1). Yellow solid. Mp 47-48 °C. IR (KBr)  $\nu$   $\text{cm}^{-1}$ ; 1489, 1461, 1438, 1361, 1338, 1193, 1092, 1015, 750.  $^1\text{H-NMR}$  (500 MHz,  $\text{CDCl}_3$ )  $\delta$  ppm; 7.63 (d,  $J = 8.0$  Hz, 1H), 7.44 (d,  $J = 8.2$  Hz, 2H), 7.35 (d,  $J = 8.2$  Hz, 2H), 7.32 (d,  $J = 8.0$  Hz, 1H), 7.25 (dd,  $J = 8.0, 7.8$  Hz, 1H), 7.16 (dd,  $J = 8.0, 7.8$  Hz, 1H), 6.02 (ddt,  $J = 17.2, 10.3, 6.0$  Hz, 1H), 5.90 (ddt,  $J = 17.2, 10.3, 4.6$  Hz, 1H), 5.14 (d,  $J = 10.3$  Hz, 1H), 5.04-5.01 (m, 2H), 4.89 (d,  $J = 17.2$  Hz, 1H), 4.59 (ddd,  $J = 4.6, 2.3, 2.3$  Hz, 2H), 3.43 (d,  $J = 6.0$  Hz, 2H).  $^{13}\text{C-NMR}$  (125 MHz,  $\text{CDCl}_3$ )  $\delta$  ppm; 137.7, 136.8, 136.6, 134.2, 133.8, 131.6, 130.2, 128.6, 127.9, 122.0, 119.5, 119.4, 116.3, 114.8, 111.3, 110.1, 46.4, 29.1. HRMS (ESI):  $m/z$  calcd. for  $\text{C}_{20}\text{H}_{17}\text{ClN}^+$   $[\text{M-H}]^+$  306.1044; found 306.1041.

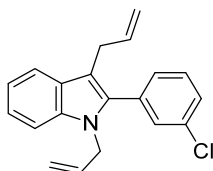

**1,3-Diallyl-2-(3-chlorophenyl)-1H-indole (2f):** 26% (39.9 mg from **1f** 155.1 mg).  $R_f = 0.30$  (hexane: AcOEt = 20:1). Yellow oil. IR (neat)  $\nu$   $\text{cm}^{-1}$ ; 1460, 1439, 1361, 1193, 1118, 1078, 741.  $^1\text{H-NMR}$  (500 MHz,  $\text{CDCl}_3$ )  $\delta$  ppm; 7.64 (d,  $J = 7.4$  Hz, 1H), 7.45-7.37 (m, 3H), 7.32 (d,  $J = 7.4$  Hz, 1H), 7.32-7.29 (m, 1H), 7.25 (dd,  $J = 7.4, 7.4$  Hz, 1H), 7.16 (dd,  $J = 7.4, 7.4$  Hz, 1H), 6.03 (ddt,  $J = 18.0, 11.2, 5.7$  Hz, 1H), 5.91 (ddt,  $J = 17.2, 10.3, 4.6$  Hz, 1H), 5.15 (d,  $J = 10.3$  Hz, 1H), 5.05-5.02 (m, 2H), 4.90 (d,  $J = 17.2$  Hz, 1H), 4.61 (d,  $J = 4.6$  Hz, 2H), 3.44 (d,  $J = 5.7$  Hz, 2H).  $^{13}\text{C-NMR}$  (125 MHz,  $\text{CDCl}_3$ )  $\delta$  ppm; 137.6, 136.9, 136.4, 134.1, 133.7, 133.6, 130.3, 129.5, 128.5, 128.2, 127.9, 122.1, 119.6, 119.5, 116.4, 114.8, 111.6, 110.1, 46.5, 29.1. HRMS (ESI):  $m/z$  calcd. for  $\text{C}_{20}\text{H}_{17}\text{ClN}^+$   $[\text{M-H}]^+$  306.1044; found 306.1038.

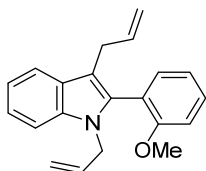

**1,3-Diallyl-2-(2-methoxyphenyl)-1H-indole (2h):** 58% (90.2 mg from **1h** 156.2 mg).  $R_f$  = 0.26 (hexane:AcOEt = 20:1). Yellow oil. IR (neat)  $\nu$   $\text{cm}^{-1}$ ; 1489, 1464, 1435, 1363, 1253, 1192, 1025, 741.  $^1\text{H-NMR}$  (500 MHz,  $\text{CDCl}_3$ )  $\delta$  ppm; 7.64 (d,  $J$  = 7.4 Hz, 1H), 7.44 (ddd,  $J$  = 7.9, 7.9, 1.7 Hz, 1H), 7.34 (d,  $J$  = 7.9 Hz, 1H), 7.27 (dd,  $J$  = 7.4, 2.0 Hz, 1H), 7.21 (ddd,  $J$  = 7.9, 7.9, 1.7 Hz, 1H), 7.12 (dd,  $J$  = 7.4, 7.4 Hz, 1H), 7.04 (dd,  $J$  = 7.4, 7.4 Hz, 1H), 7.01 (d,  $J$  = 7.9 Hz, 1H), 5.97 (ddt,  $J$  = 17.1, 10.2, 6.1 Hz, 1H), 5.83 (ddt,  $J$  = 17.1, 10.2, 5.2 Hz, 1H), 5.05 (ddt,  $J$  = 10.2, 1.7, 1.7 Hz, 1H), 5.03 (ddt,  $J$  = 17.1, 1.7, 1.7 Hz, 1H), 4.96 (ddt,  $J$  = 10.2, 1.7, 1.7 Hz, 1H), 4.92 (ddt,  $J$  = 17.1, 1.7, 1.7 Hz, 1H), 4.58 (ddt,  $J$  = 16.9, 5.2, 1.7 Hz, 1H), 4.46 (ddt,  $J$  = 16.9, 5.2, 1.7 Hz, 1H), 3.76 (s, 3H), 3.42 (ddt,  $J$  = 15.8, 6.1, 1.7 Hz, 1H), 3.32 (ddt,  $J$  = 15.8, 6.1, 1.7 Hz, 1H).  $^{13}\text{C-NMR}$  (125 MHz,  $\text{CDCl}_3$ )  $\delta$  ppm; 158.0, 138.0, 136.5, 134.5, 134.3, 133.0, 130.2, 128.0, 121.3, 120.6, 120.4, 119.2, 118.9, 116.0, 114.2, 111.1, 110.9, 110.0, 55.3, 46.7, 29.5. HRMS (ESI):  $m/z$  calcd. for  $\text{C}_{21}\text{H}_{20}\text{NO}^+$  [M-H] $^+$  302.1539; found 302.1544.

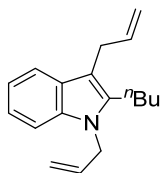

**1,3-Diallyl-2-butyl-1H-indole (2i):** 62% (80.7 mg from **1i** 129.6 mg).  $R_f$  = 0.35 (hexane:AcOEt = 20:1). Yellow oil. IR (neat)  $\nu$   $\text{cm}^{-1}$ ; 1468, 1438, 1415, 1364, 1180, 740.  $^1\text{H-NMR}$  (500 MHz,  $\text{CDCl}_3$ )  $\delta$  ppm; 7.53 (d,  $J$  = 8.0 Hz, 1H), 7.23 (d,  $J$  = 8.0 Hz, 1H), 7.14 (dd,  $J$  = 8.0, 7.4 Hz, 1H), 7.07 (dd,  $J$  = 8.0, 7.4 Hz, 1H), 6.05-5.90 (m, 2H), 5.12 (dd,  $J$  = 10.3, 1.2 Hz, 1H), 5.08 (dd,  $J$  = 16.9, 1.9 Hz, 1H), 5.00 (dd,  $J$  = 10.2, 1.9 Hz, 1H), 4.85 (dd,  $J$  = 17.2, 1.2 Hz, 1H), 4.70 (ddd,  $J$  = 4.6, 1.7, 1.7 Hz, 2H), 3.50 (d,  $J$  = 5.9 Hz, 2H), 2.71 (t,  $J$  = 8.0 Hz, 2H), 1.56-1.52 (m, 2H), 1.46-1.36 (m, 2H), 0.95 (t,  $J$  = 7.4 Hz, 3H).  $^{13}\text{C-NMR}$  (125 MHz,  $\text{CDCl}_3$ )  $\delta$  ppm; 137.8, 137.3, 136.1, 133.8, 128.0, 120.6, 118.8, 118.4, 116.0, 114.3, 109.2, 108.8, 45.4, 32.4, 29.0, 24.2, 22.7, 13.9. HRMS (ESI):  $m/z$  calcd. for  $\text{C}_{18}\text{H}_{22}\text{N}^+$  [M-H] $^+$  252.1747; found 252.1752.

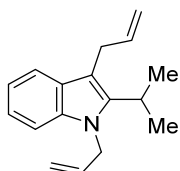

**1,3-Diallyl-2-isopropyl-1H-indole (2j):** 47% (56.0 mg from **1j** 120.0 mg).  $R_f$  = 0.41 (hexane:AcOEt = 20:1). Colorless oil. IR (neat)  $\nu$   $\text{cm}^{-1}$ ; 1469, 1416, 1362, 1189, 916, 742.  $^1\text{H-NMR}$  (500 MHz,  $\text{CDCl}_3$ )  $\delta$  ppm; 7.52 (d,  $J$  = 8.0 Hz, 1H), 7.21 (d,  $J$  = 8.0 Hz, 1H), 7.14 (ddd,  $J$  = 8.0, 6.9, 1.2 Hz, 1H), 7.07 (ddd,  $J$  = 8.0, 6.9, 1.2 Hz, 1H), 6.07-5.91 (m, 2H), 5.13 (ddt,  $J$  = 10.3, 1.7, 1.7 Hz, 1H), 5.05 (ddt,  $J$  = 17.2, 1.7, 1.7 Hz, 1H), 5.01 (ddt,  $J$  = 10.3, 1.7, 1.7 Hz, 1H), 4.86 (ddt,  $J$  = 17.2, 1.7, 1.7 Hz, 1H), 4.62 (ddd,  $J$  = 4.6, 1.7, 1.7 Hz, 2H), 3.61 (ddd,  $J$  = 5.7, 1.7, 1.7 Hz, 2H), 3.24 (sep,  $J$  = 7.1 Hz, 1H), 1.40 (d,  $J$  = 7.1 Hz, 6H).  $^{13}\text{C-NMR}$  (125 MHz,  $\text{CDCl}_3$ )  $\delta$  ppm; 141.6, 138.0, 136.0, 133.9, 128.5, 120.8, 118.9, 118.2, 116.0, 114.4, 109.1, 107.9, 45.7, 29.0, 25.8, 22.2. HRMS (ESI):  $m/z$  calcd. for  $\text{C}_{17}\text{H}_{20}\text{N}^+$  [M-H] $^+$  238.1590; found 238.1597.

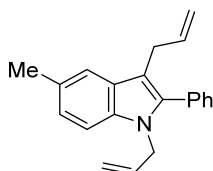

**1,3-Diallyl-5-methyl-2-phenyl-1H-indole (2k):** 61% (87.0 mg from **1k** 142.7 mg).  $R_f$  = 0.31 (hexane:AcOEt = 20:1). Yellow solid. Mp 66-68 °C. IR (KBr)  $\nu$   $\text{cm}^{-1}$ ; 1483, 1442, 1407, 1362, 1178, 761.  $^1\text{H-NMR}$  (500 MHz,  $\text{CDCl}_3$ )  $\delta$  ppm; 7.48-7.40 (m, 6H), 7.21 (d,  $J$  = 8.3 Hz, 1H), 7.06 (d,  $J$  = 8.3 Hz, 1H), 6.03 (ddt,  $J$  = 16.7, 10.3, 5.7 Hz, 1H), 5.89 (ddt,  $J$  = 17.2, 10.3, 4.6 Hz, 1H), 5.12 (d,  $J$  = 10.3 Hz, 1H), 5.04 (dd,  $J$  = 16.7, 1.2 Hz, 1H), 5.01 (dd,  $J$  = 10.3, 1.2 Hz, 1H), 4.90 (dd,  $J$  = 17.2, 1.2 Hz, 1H), 4.58 (ddd,  $J$  = 4.6, 1.7, 1.7 Hz, 2H), 3.42 (d,  $J$  = 5.7 Hz, 2H), 2.48 (s, 3H).  $^{13}\text{C-NMR}$  (125 MHz,  $\text{CDCl}_3$ )  $\delta$  ppm; 138.1, 138.0, 135.2, 134.1, 131.9, 130.4, 128.6, 128.2, 128.0, 123.3, 119.0, 116.1, 114.5, 110.4, 109.8, 46.4, 29.2, 21.5 (note that two carbon peaks overlap with each other). HRMS (ESI):  $m/z$  calcd. for  $\text{C}_{21}\text{H}_{20}\text{N}^+$  [M-H] $^+$  286.1590; found 286.1583.

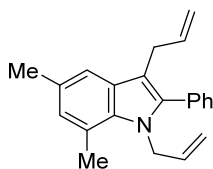

**1,3-Diallyl-5,7-dimethyl-2-phenyl-1H-indole (2l):** 67% (99.4 mg from **1l** 148.9 mg).  $R_f$  = 0.33 (hexane:AcOEt = 20:1). Yellow solid. Mp 48-49 °C. IR (KBr)  $\nu$   $\text{cm}^{-1}$ ; 1468, 1446, 1417, 1364, 1176, 756.  $^1\text{H-NMR}$  (500 MHz,  $\text{CDCl}_3$ )  $\delta$  ppm; 7.58-7.48 (m, 5H), 7.38 (s, 1H), 6.92 (s, 1H), 6.12 (ddt,  $J$  = 17.2, 10.3, 5.7 Hz, 1H), 5.93 (ddt,  $J$  = 17.2, 10.3, 3.7 Hz, 1H), 5.15-5.10 (m, 3H), 4.84 (ddd,  $J$  = 3.7, 1.7, 1.7 Hz, 2H), 4.69 (d,  $J$  = 17.2 Hz, 1H), 3.48 (d,  $J$  = 5.7 Hz, 2H), 2.78 (s, 3H), 2.56 (s, 3H).  $^{13}\text{C-NMR}$  (125 MHz,  $\text{CDCl}_3$ )  $\delta$  ppm; 139.2, 137.9, 136.0, 133.9, 132.2, 130.6, 129.1, 128.7, 128.1, 128.0, 126.6, 120.7, 116.8, 115.2, 114.4, 111.1, 47.5, 29.1, 21.2, 19.5. HRMS (ESI):  $m/z$  calcd. for  $\text{C}_{22}\text{H}_{24}\text{N}^+$  [M+H] $^+$  302.1903; found 302.1899.

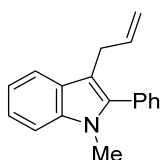

**3-Allyl-1-methyl-2-phenyl-1H-indole (2m):** 49% (59.1 mg from **1m** 120.4 mg).  $R_f$  = 0.29 (hexane:AcOEt = 20:1). Yellow oil. IR (neat)  $\nu$   $\text{cm}^{-1}$ ; 1469, 1442, 1428, 1363, 1155, 741.  $^1\text{H-NMR}$  (500 MHz,  $\text{CDCl}_3$ )  $\delta$  ppm; 7.63 (d,  $J$  = 8.0 Hz, 1H), 7.51-7.46 (m, 2H), 7.45-7.38 (m, 3H), 7.35 (d,  $J$  = 8.0 Hz, 1H), 7.26 (ddd,  $J$  = 8.0, 8.0, 1.2 Hz, 1H), 7.15 (ddd,  $J$  = 8.0, 8.0, 1.2 Hz, 1H), 6.02 (ddt,  $J$  = 16.6, 10.3, 5.9 Hz, 1H), 5.05 (ddt,  $J$  = 16.6, 1.7, 1.7 Hz, 1H), 5.00 (ddt,  $J$  = 10.3, 1.7, 1.7 Hz, 1H), 3.63 (s, 3H), 3.45 (ddt,  $J$  = 5.9, 1.7, 1.7 Hz, 2H).  $^{13}\text{C-NMR}$



NMR (125 MHz, CDCl<sub>3</sub>)  $\delta$  ppm; 138.1, 138.0, 137.3, 131.8, 130.5, 128.3, 128.0, 127.7, 121.7, 119.3, 119.2, 114.6, 110.6, 109.3, 30.9, 29.2. HRMS (ESI):  $m/z$  calcd. for C<sub>18</sub>H<sub>16</sub>N<sup>+</sup> [M-H]<sup>+</sup> 246.1277; found 246.1272.

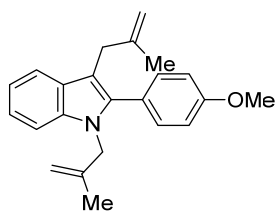

**2-(4-Methoxyphenyl)-1,3-bis(2-methylallyl)-1H-indole (2n)**: 79% (131.6 mg from **1n** 166.2 mg).  $R_f$  = 0.29 (hexane:AcOEt = 20:1). Yellow solid. Mp 68-69 °C. IR (KBr)  $\nu$  cm<sup>-1</sup>; 1508, 1465, 1442, 1363, 1251, 1178, 1030, 742. <sup>1</sup>H-NMR (500 MHz, CDCl<sub>3</sub>)  $\delta$  ppm; 7.62 (d,  $J$  = 8.0 Hz, 1H), 7.36 (d,  $J$  = 8.6 Hz, 2H), 7.29 (d,  $J$  = 8.0 Hz, 1H), 7.22 (dd,  $J$  = 8.0, 7.4 Hz, 1H), 7.14 (dd,  $J$  = 8.0, 7.4 Hz, 1H), 7.00 (d,  $J$  = 8.6 Hz, 2H), 4.85 (s, 1H), 4.79 (s, 1H), 4.69 (s, 1H), 4.52 (s, 2H), 4.49 (s, 1H), 3.89 (s, 3H), 3.40 (s, 2H), 1.75 (s, 3H), 1.63 (s, 3H). <sup>13</sup>C-NMR (125 MHz, CDCl<sub>3</sub>)  $\delta$  ppm; 159.4, 145.4, 141.5, 138.4, 136.7, 131.4, 128.3, 124.2, 121.4, 119.3, 119.2, 113.7, 111.1, 110.6, 110.5, 110.0, 55.2, 49.6, 33.3, 22.7, 20.0. HRMS (ESI):  $m/z$  calcd. for C<sub>23</sub>H<sub>24</sub>NO<sup>+</sup> [M-H]<sup>+</sup> 330.1852; found 330.1851.

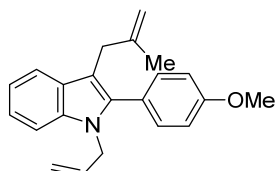

**1-Allyl-2-(4-methoxyphenyl)-3-(2-methylallyl)-1H-indole (2o)** and **3-allyl-2-(4-methoxyphenyl)-1-(2-methylallyl)-1H-indole (2o')**: 58% (**2o:2o'** = 64:36, 111.0 mg from **1n** 190.0 mg).  $R_f$  = 0.29 (hexane: AcOEt = 20:1). Yellow oil. IR (neat)  $\nu$  cm<sup>-1</sup>; 1509, 1465, 1432, 1360, 1256, 1180, 1030, 746. <sup>1</sup>H-NMR (500 MHz, CDCl<sub>3</sub>, 64:36 mixture of **2o** and **2o'**)  $\delta$  ppm; 7.61 (d,  $J$  = 8.0 Hz, 0.36H), 7.60 (d,  $J$  = 7.6 Hz, 0.64H), 7.35-7.26 (m, 3H), 7.23-7.18 (m, 1H), 7.15-7.10 (m, 1H), 7.01-6.96 (m, 2H), 6.94 (ddt,  $J$  = 16.9, 10.0, 5.7 Hz, 0.36H), 5.90 (ddt,  $J$  = 17.2, 10.3, 4.6 Hz, 0.64H), 5.11 (ddt,  $J$  = 10.3, 1.2, 1.7 Hz, 0.64H), 5.05-4.99 (m, 0.72H), 4.87 (ddt,  $J$  = 17.2, 1.2, 1.7 Hz, 0.64H), 4.83 (s, 0.36H), 4.75 (s, 0.64H), 4.66 (s, 0.64H), 4.59 (ddd,  $J$  = 4.6, 2.3, 2.3 Hz, 1.28H), 4.48 (s, 1.08H), 3.87 (s, 3H), 3.43 (ddd,  $J$  = 5.7, 1.7, 1.7 Hz, 0.72H), 3.36 (s, 1.28H), 1.71 (s, 1.92H), 1.62 (s, 1.08H). <sup>13</sup>C-NMR (125 MHz, CDCl<sub>3</sub>, 64:36 mixture of **2o** and **2o'**)  $\delta$  ppm; 159.4, 145.4, 141.4 (minor), 138.3 (minor), 138.1, 136.8 (minor), 136.6, 134.1, 131.6, 131.5 (minor), 128.3, 128.0 (minor), 124.10, 124.06 (minor), 121.5 (minor), 121.4, 119.4, 119.22 (minor), 119.19, 119.1 (minor), 116.1, 114.5 (minor), 113.7, 111.1 (minor), 110.7, 110.6, 110.4 (minor), 110.1 (minor), 109.9, 55.3, 49.6 (minor), 46.3, 33.3, 29.2 (minor), 22.7, 20.1 (minor) [note that four carbon peaks of **2o'** overlap with the peaks of **2o**]. HRMS (ESI):  $m/z$  calcd. for C<sub>22</sub>H<sub>22</sub>NO<sup>+</sup> [M-H]<sup>+</sup> 316.1696; found 316.1691.

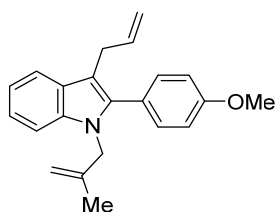

**3-(But-3-en-2-yl)-2-(4-methoxyphenyl)-1-methyl-1H-indole (2p)** and **3-(but-2-en-1-yl)-2-(4-methoxyphenyl)-1-methyl-1H-indole (4p)**: 61% (**2p:E-4p:Z-4p** = 73:14:13, 87.0 mg from **1p** 142.0 mg).  $R_f$  = 0.25 (hexane:AcOEt = 20:1). Yellow solid. Mp 105-107 °C. IR (KBr)  $\nu$  cm<sup>-1</sup>; 1504, 1465, 1433, 1365, 1248, 1178, 1025, 745. <sup>1</sup>H-NMR (500 MHz, CDCl<sub>3</sub>, 73:14:13 mixture of **2p**, **E-4p** and **Z-4p**)  $\delta$  ppm; 7.70 (d,  $J$  = 8.0 Hz, 0.73H), 7.61 (dd,  $J$  = 8.0, 8.0 Hz, 0.27H), 7.35-7.28 (m, 3H), 7.22 (ddd,  $J$  = 8.0, 8.0, 1.2 Hz, 1H), 7.13 (dd,  $J$  = 7.4, 7.4 Hz, 0.27H), 7.09 (dd,  $J$  = 7.2, 7.2 Hz, 0.73H), 7.02 (d,  $J$  = 8.6 Hz, 2H), 6.21 (ddd,  $J$  = 17.5, 10.3, 5.2 Hz, 0.73H), 5.68-5.54 (m, 0.27H), 5.52-5.40 (m, 0.27H), 5.05 (ddd,  $J$  = 17.5, 1.7, 1.7 Hz, 0.73H), 5.00 (ddd,  $J$  = 10.3, 1.7, 1.7 Hz, 0.73H), 3.89 (s, 3H), 3.64-3.57 (m, 0.73H), 3.60 (s, 0.42H), 3.59 (s, 0.39H), 3.55 (s, 2.19H), 3.43 (d,  $J$  = 6.9 Hz, 0.27H), 3.35 (ddq,  $J$  = 5.7, 1.4, 1.5 Hz, 0.27H), 1.68 (dd,  $J$  = 7.2, 1.4 Hz, 0.39H), 1.63 (ddt,  $J$  = 7.3, 1.7, 1.5 Hz, 0.42H), 1.45 (d,  $J$  = 7.4 Hz, 2.19H). <sup>13</sup>C-NMR (125 MHz, CDCl<sub>3</sub>, **2p** in 73:14:13 mixture of **2p**, **E-4p** and **Z-4p**)  $\delta$  ppm; 159.5, 143.3, 137.2, 137.1, 132.0, 126.2, 124.3, 121.2, 120.4, 118.8, 115.8, 113.7, 112.4, 109.4, 55.3, 34.9, 30.6, 20.2. HRMS (ESI):  $m/z$  calcd. for C<sub>20</sub>H<sub>20</sub>NO<sup>+</sup> [M-H]<sup>+</sup> 290.1539; found 290.1541.

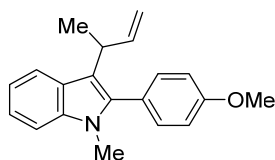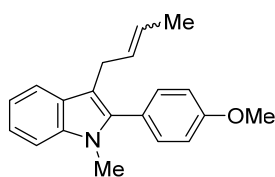

**2-(4-Methoxyphenyl)-1-(3-methylbut-2-en-1-yl)-3-(2-methylbut-3-en-2-yl)-1H-indole (2q)**: 16% (28.7 mg from **1q** 181.4 mg).  $R_f$  = 0.29 (hexane: AcOEt = 20:1). Yellow solid. Mp 103-104 °C. IR (KBr)  $\nu$  cm<sup>-1</sup>; 1502, 1463, 1439, 1358, 1246, 1181, 1033, 746. <sup>1</sup>H-NMR (500 MHz, CDCl<sub>3</sub>)  $\delta$  ppm; 7.86 (d,  $J$  = 8.0 Hz, 1H), 7.31-7.23 (m, 3H), 7.20 (dd,  $J$  = 8.0, 6.9 Hz, 1H), 7.08 (dd,  $J$  = 7.5, 6.9 Hz, 1H), 6.94 (d,  $J$  = 8.6 Hz, 2H), 6.16 (dd,  $J$  = 17.2, 10.9 Hz, 1H), 5.13 (t,  $J$  = 6.3 Hz, 1H), 5.04 (dd,  $J$  = 17.2, 1.2 Hz, 1H), 4.93 (dd,  $J$  = 10.9, 1.2 Hz, 1H), 4.36 (d,  $J$  = 6.3 Hz, 2H), 3.89 (s, 3H), 1.64 (s, 3H), 1.50 (s, 3H), 1.32 (s, 6H). <sup>13</sup>C-NMR (125 MHz, CDCl<sub>3</sub>)  $\delta$  ppm; 159.5, 149.4, 136.0, 135.9, 133.4, 132.9, 126.83, 126.77, 122.1, 121.1, 121.0, 118.6, 118.3, 113.0, 109.5, 109.3, 55.3, 41.5, 39.0, 29.7, 25.5, 17.7. HRMS (ESI):  $m/z$  calcd. for C<sub>25</sub>H<sub>28</sub>NO<sup>+</sup> [M-H]<sup>+</sup> 358.2165; found 358.2155.

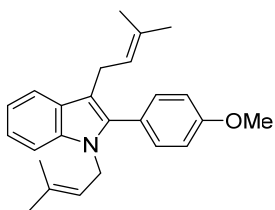

**2-(4-Methoxyphenyl)-1,3-bis(3-methylbut-2-en-1-yl)-1H-indole (4q):** 9% (17.0 mg from **1q** 181.4 mg).  $R_f = 0.29$  (hexane: AcOEt = 20:1). Yellow solid. Mp 78-79 °C. IR (KBr)  $\nu$   $\text{cm}^{-1}$ ; 1505, 1466, 1442, 1359, 1249, 1176, 1034, 741.  $^1\text{H-NMR}$  (500 MHz,  $\text{CDCl}_3$ )  $\delta$  ppm; 7.60 (d,  $J = 8.0$  Hz, 1H), 7.32-7.29 (m, 3H), 7.21 (dd,  $J = 8.0, 6.9$  Hz, 1H), 7.12 (dd,  $J = 8.0, 6.9$  Hz, 1H), 7.00 (d,  $J = 8.6$  Hz, 2H), 5.32 (t,  $J = 6.9$  Hz, 1H), 5.23 (t,  $J = 6.3$  Hz, 1H), 4.57 (d,  $J = 6.3$  Hz, 2H), 3.88 (s, 3H), 3.36 (d,  $J = 6.9$  Hz, 2H), 1.67 (s, 6H), 1.66 (s, 3H), 1.58 (s, 3H).  $^{13}\text{C-NMR}$  (125 MHz,  $\text{CDCl}_3$ )  $\delta$  ppm; 159.3, 137.1, 136.3, 133.8, 132.1, 130.2, 127.9, 124.49, 124.47, 121.32, 121.28, 119.1, 119.0, 113.7, 112.6, 109.8, 55.3, 42.3, 25.7, 25.5, 23.9, 17.84, 17.76. HRMS (ESI):  $m/z$  calcd. for  $\text{C}_{25}\text{H}_{28}\text{NO}^+$   $[\text{M-H}]^+$  358.2165; found 358.2165.

## 5. <sup>1</sup>H and <sup>13</sup>C NMR Spectra of 1b-1q, 2a-2f, 2h-2q, 4p and 4q

<sup>1</sup>H NMR (500 MHz, CDCl<sub>3</sub>) of 1b

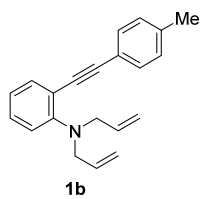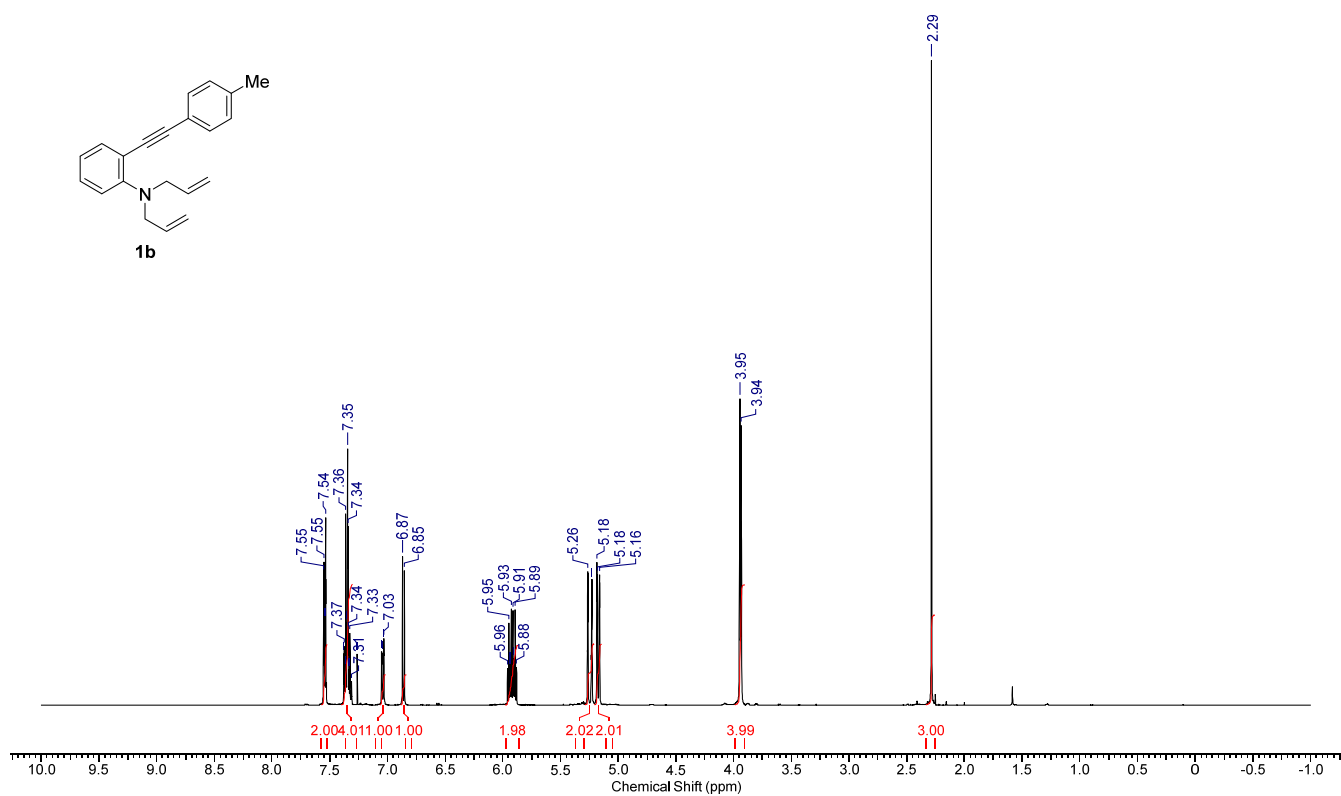

Enlarged view

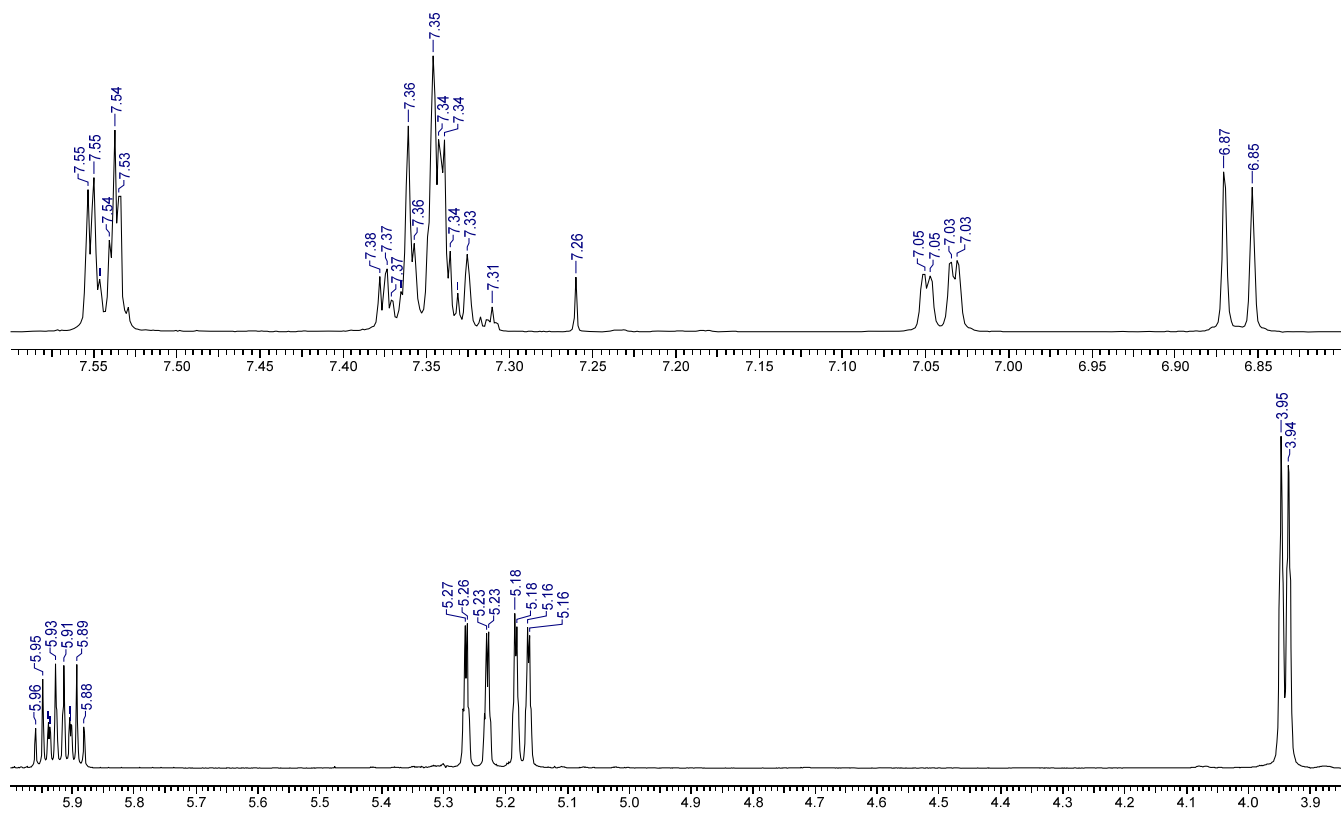

$^{13}\text{C}$  NMR (125 MHz,  $\text{CDCl}_3$ ) of **1b**

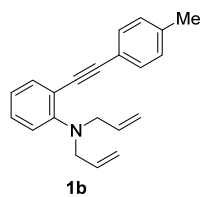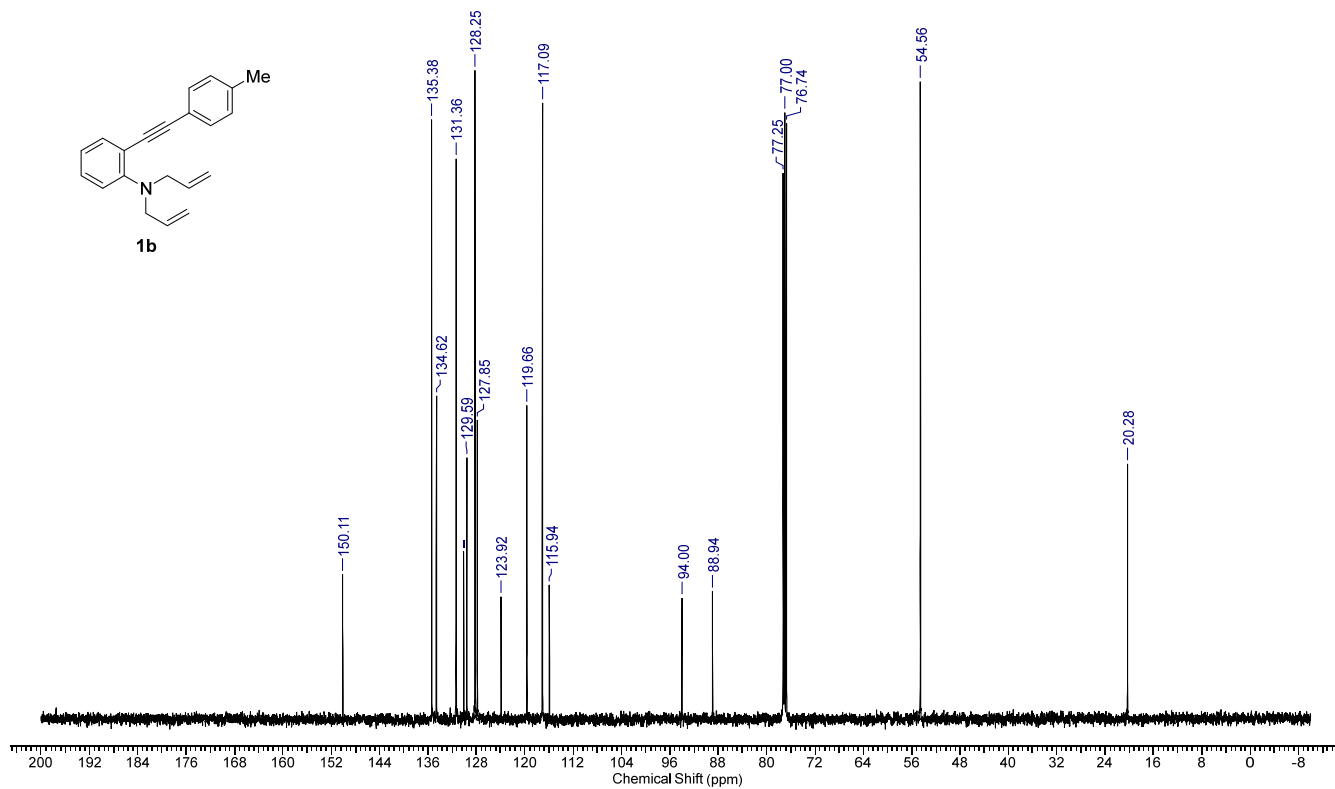

Enlarged view

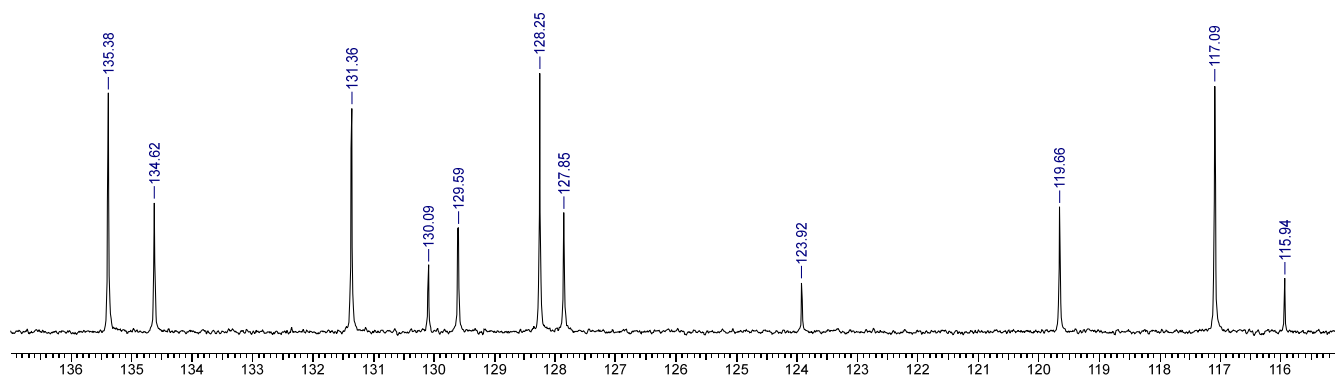

<sup>1</sup>H NMR (500 MHz, CDCl<sub>3</sub>) of **1c**

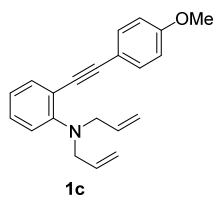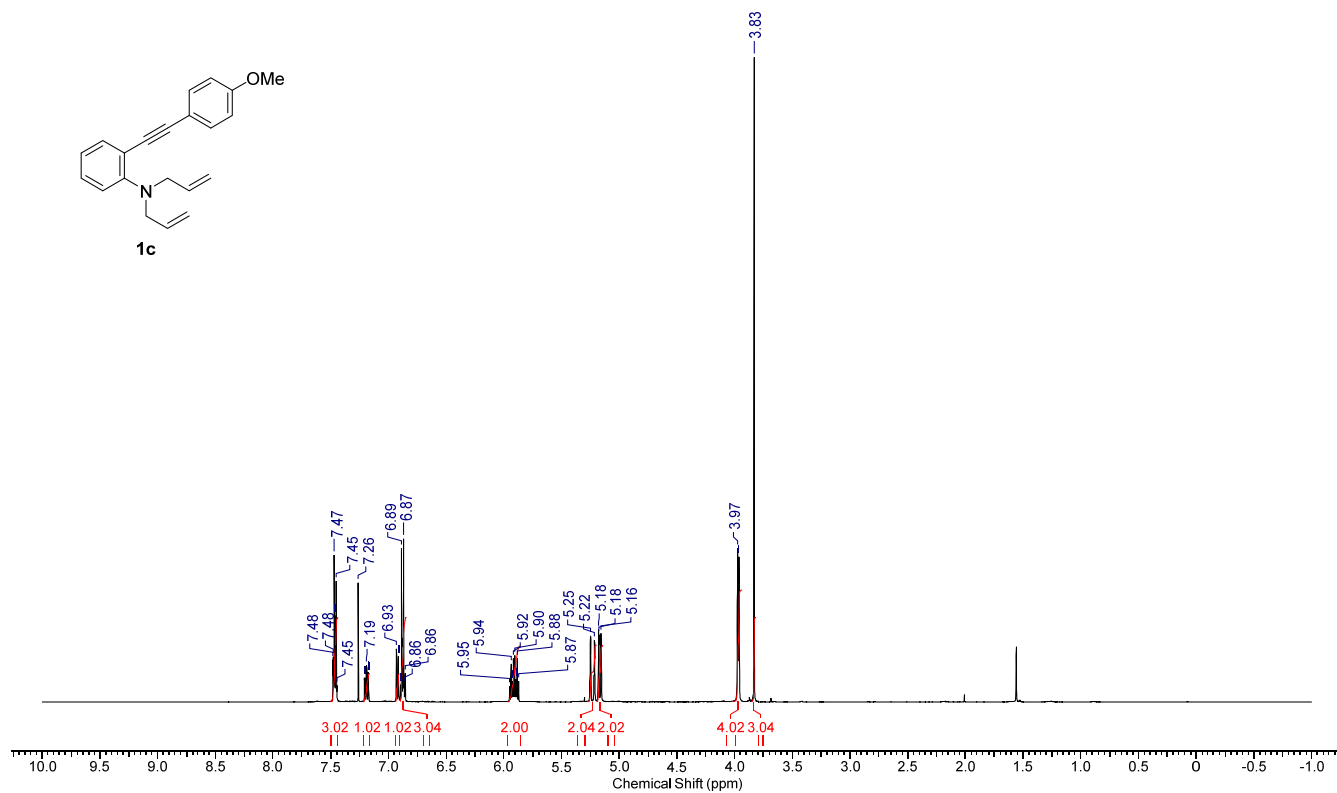

Enlarged view

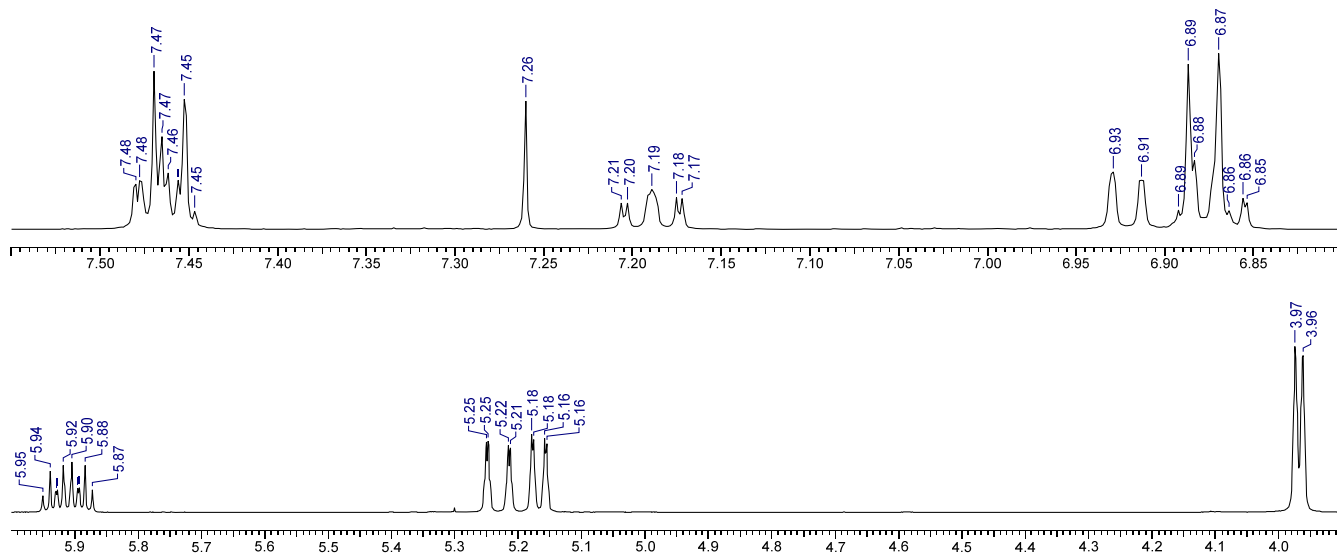

$^{13}\text{C}$  NMR (125 MHz,  $\text{CDCl}_3$ ) of **1c**

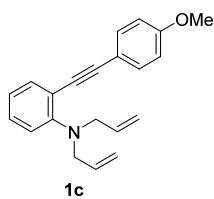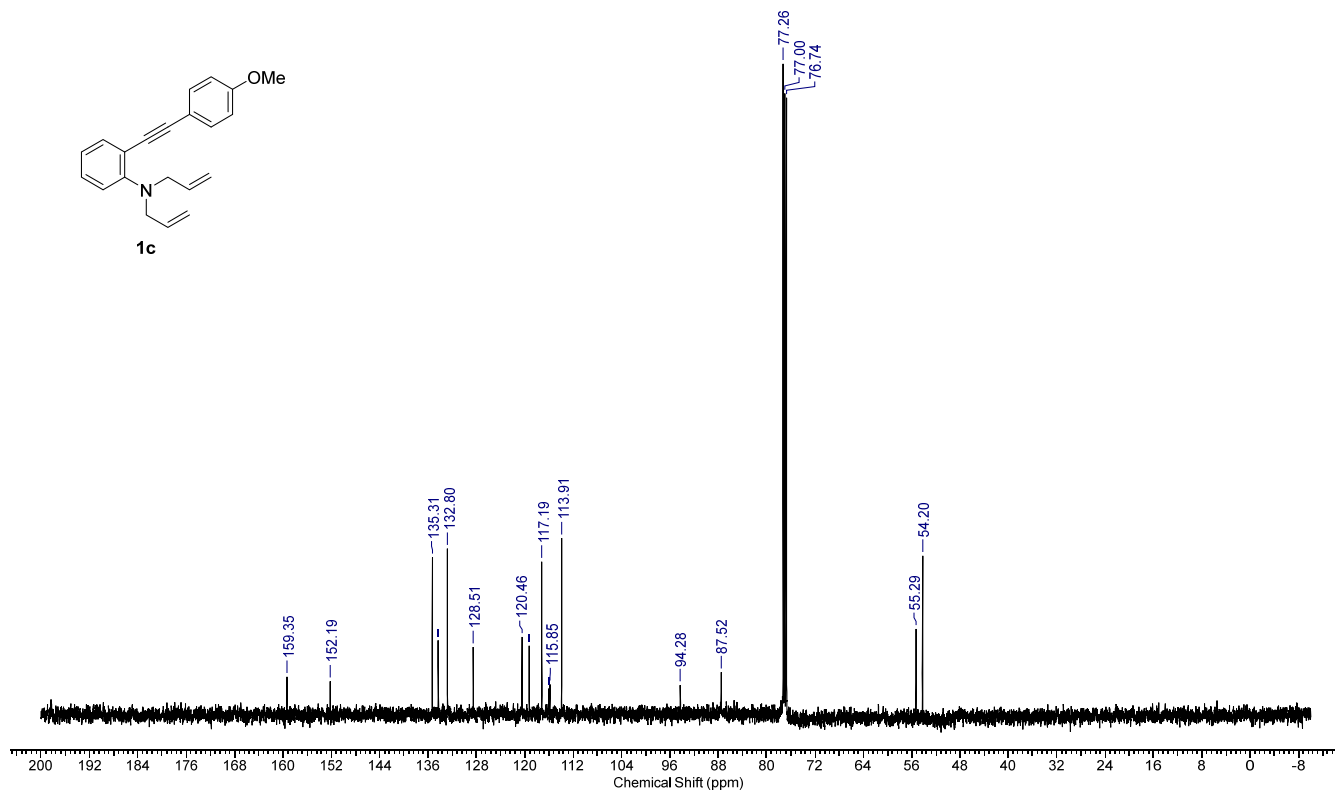

Enlarged view

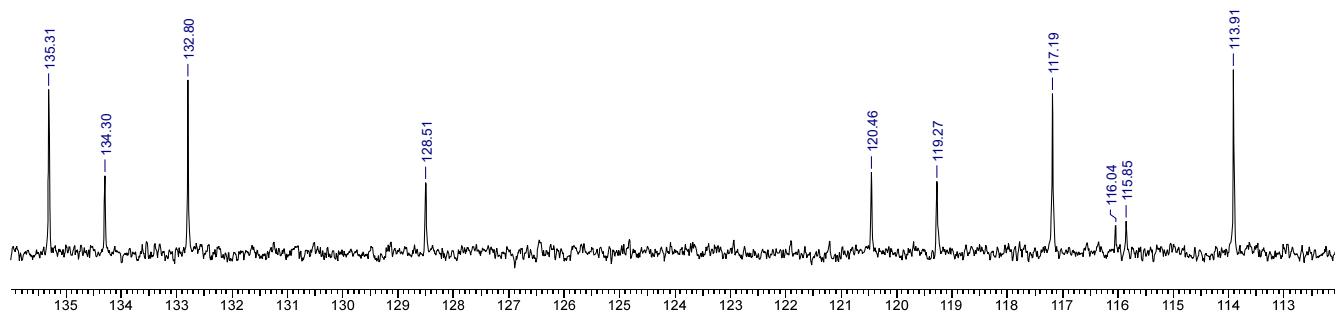

<sup>1</sup>H NMR (500 MHz, CDCl<sub>3</sub>) of **1d**

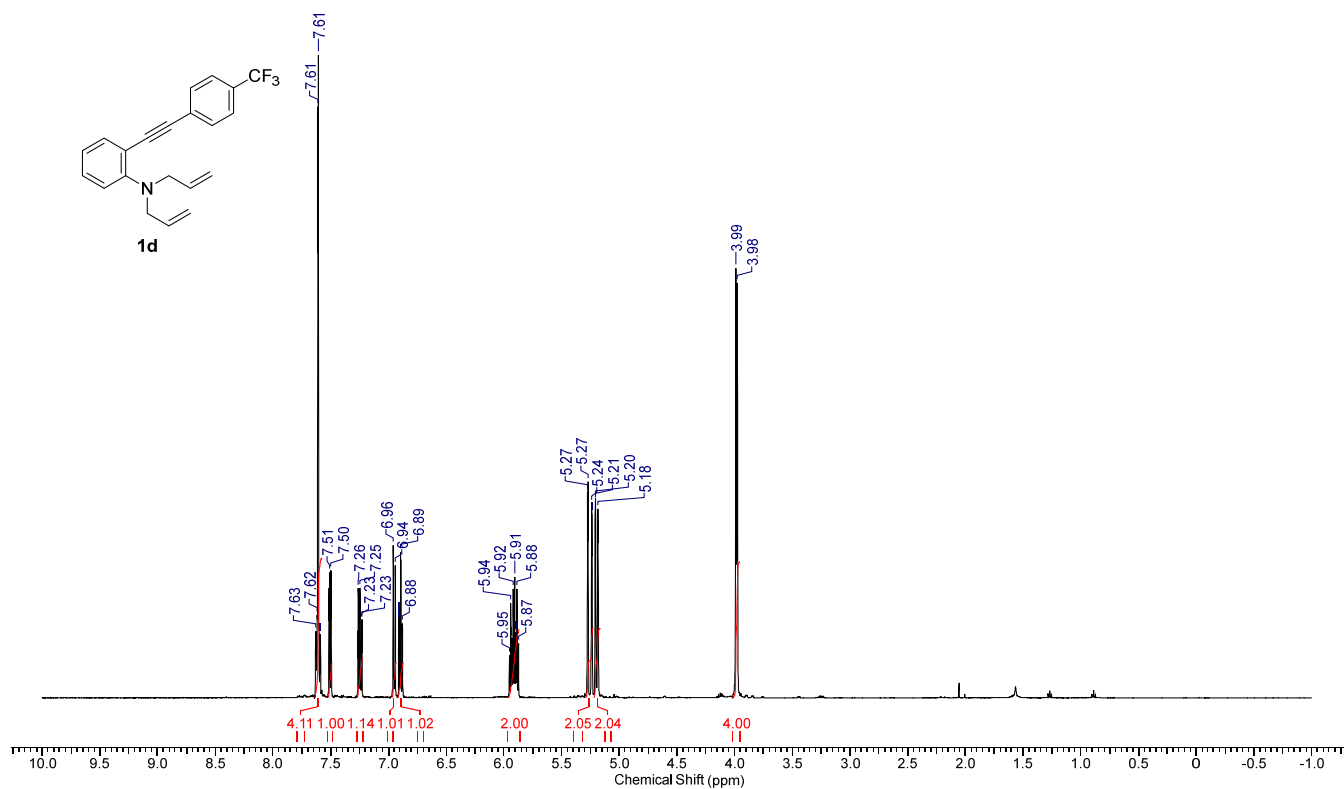

Enlarged view

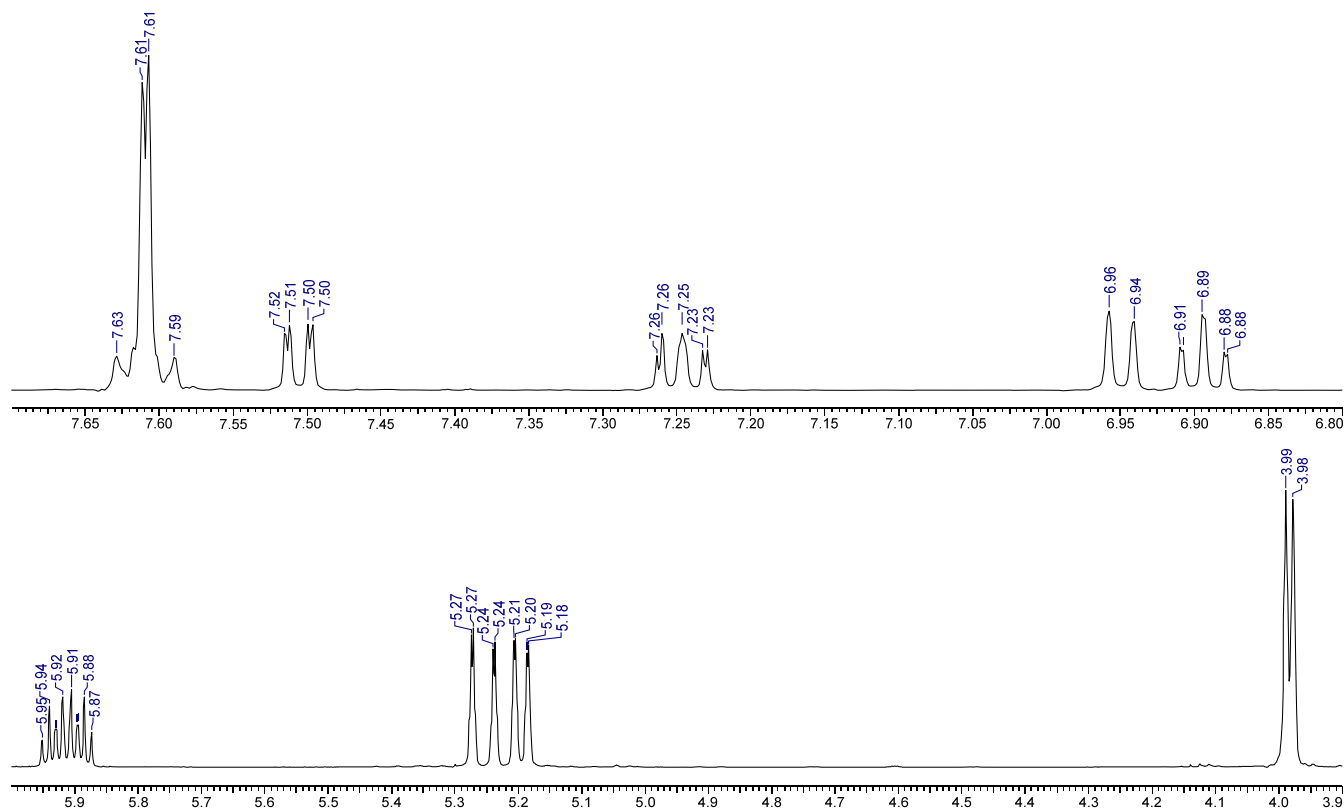

$^{13}\text{C}$  NMR (125 MHz,  $\text{CDCl}_3$ ) of **1d**

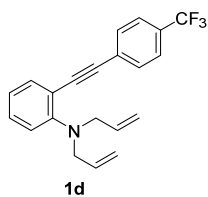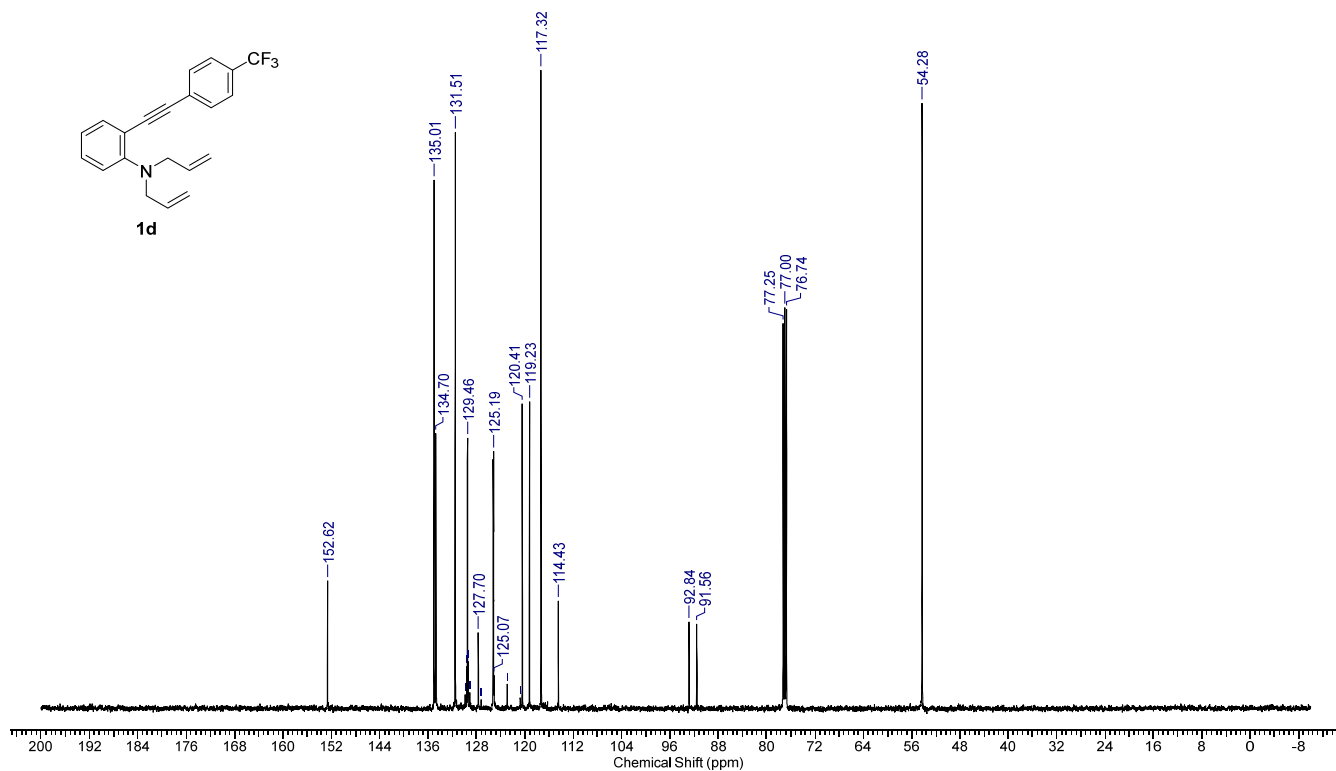

Enlarged view

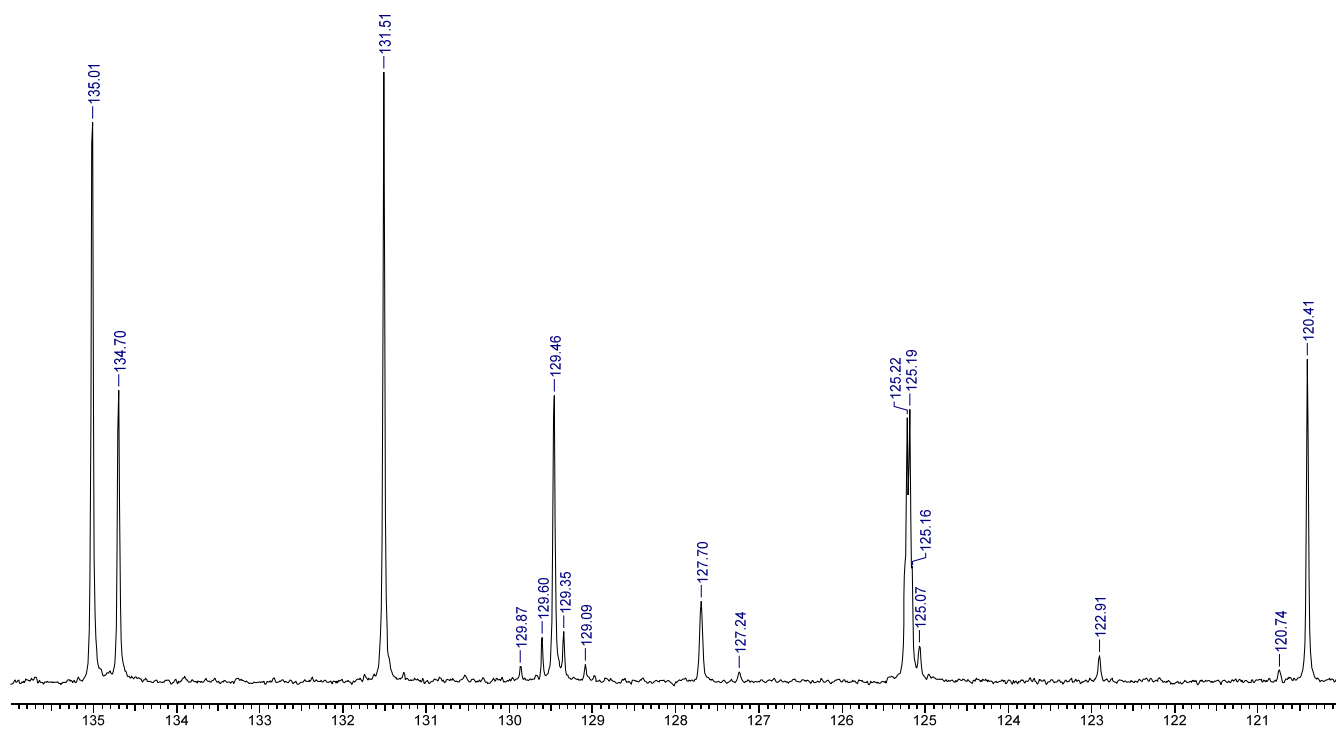



$^1\text{H}$  NMR (500 MHz,  $\text{CDCl}_3$ ) of **1e**

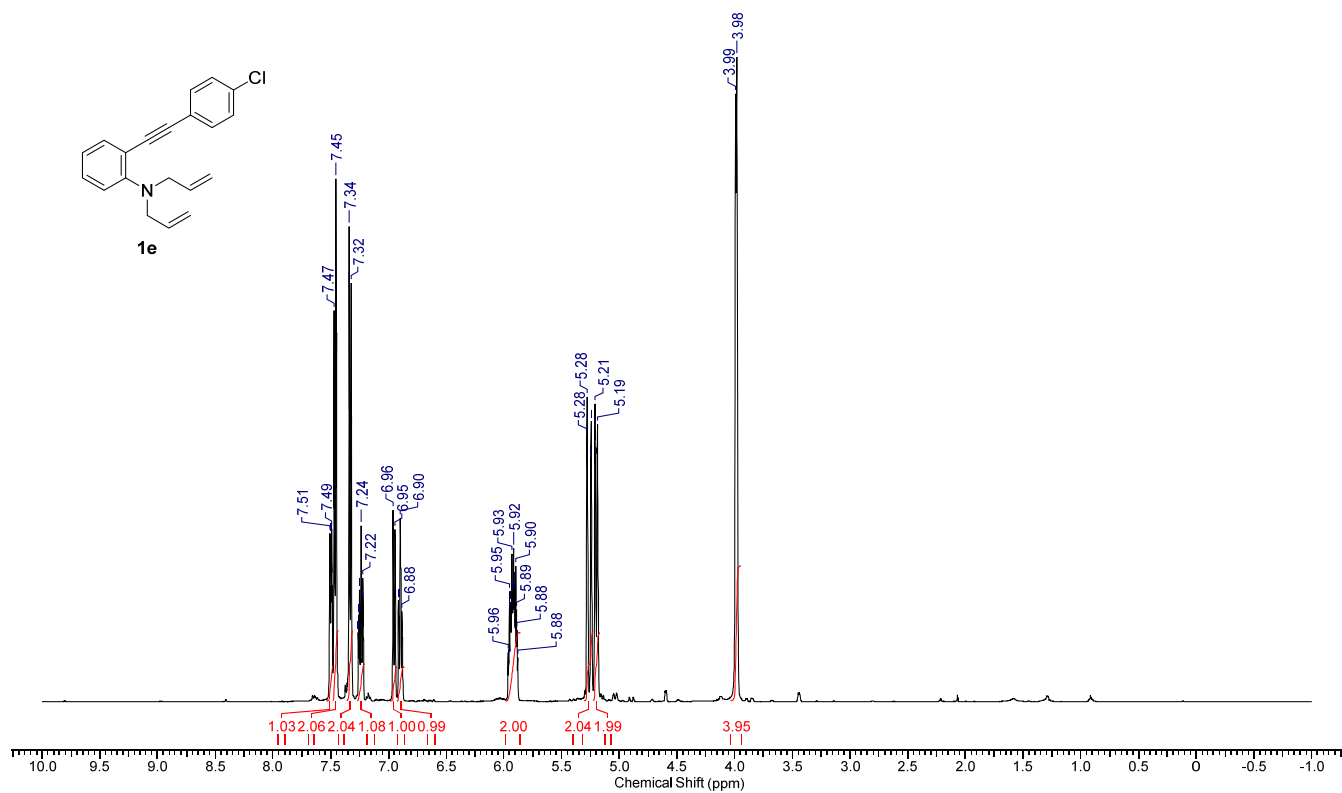

Enlarged view

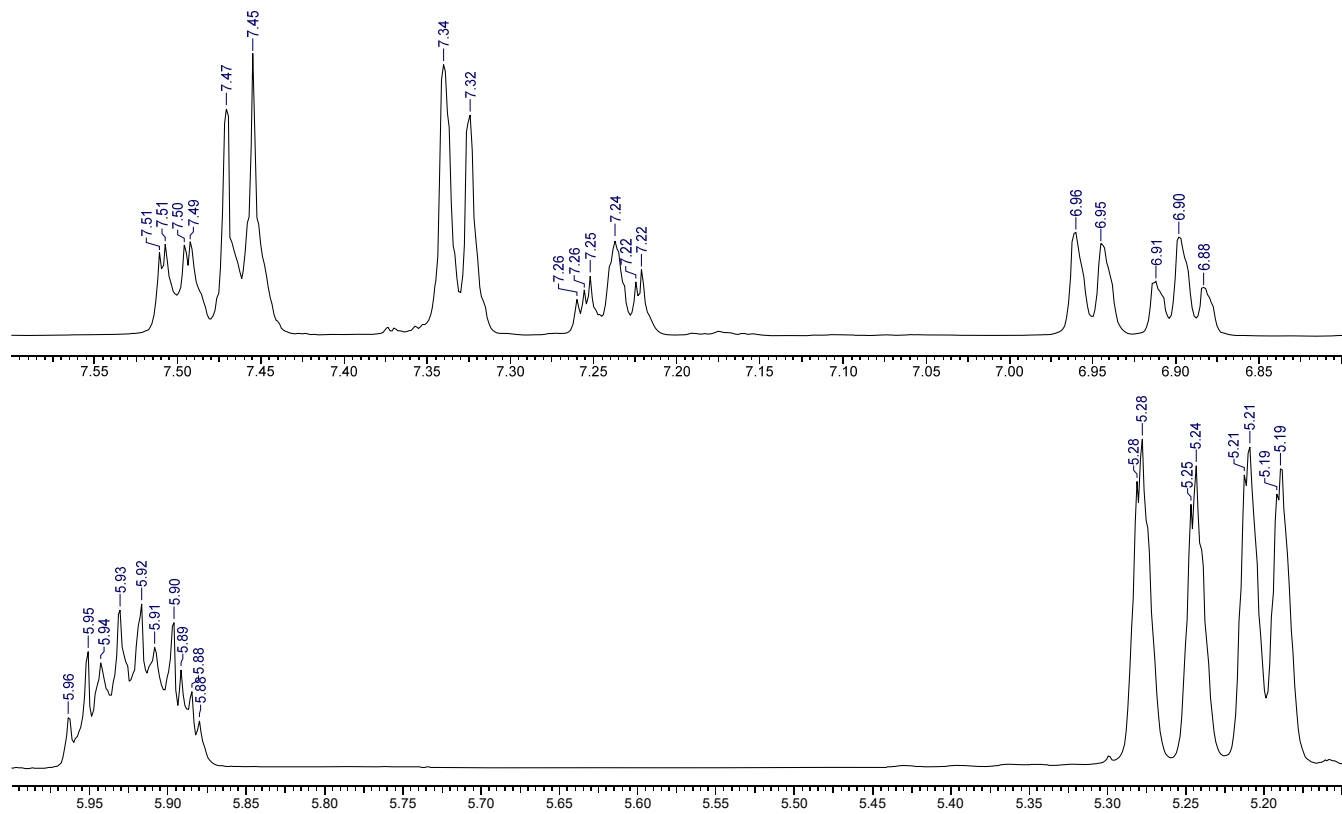

$^{13}\text{C}$  NMR (125 MHz,  $\text{CDCl}_3$ ) of **1e**

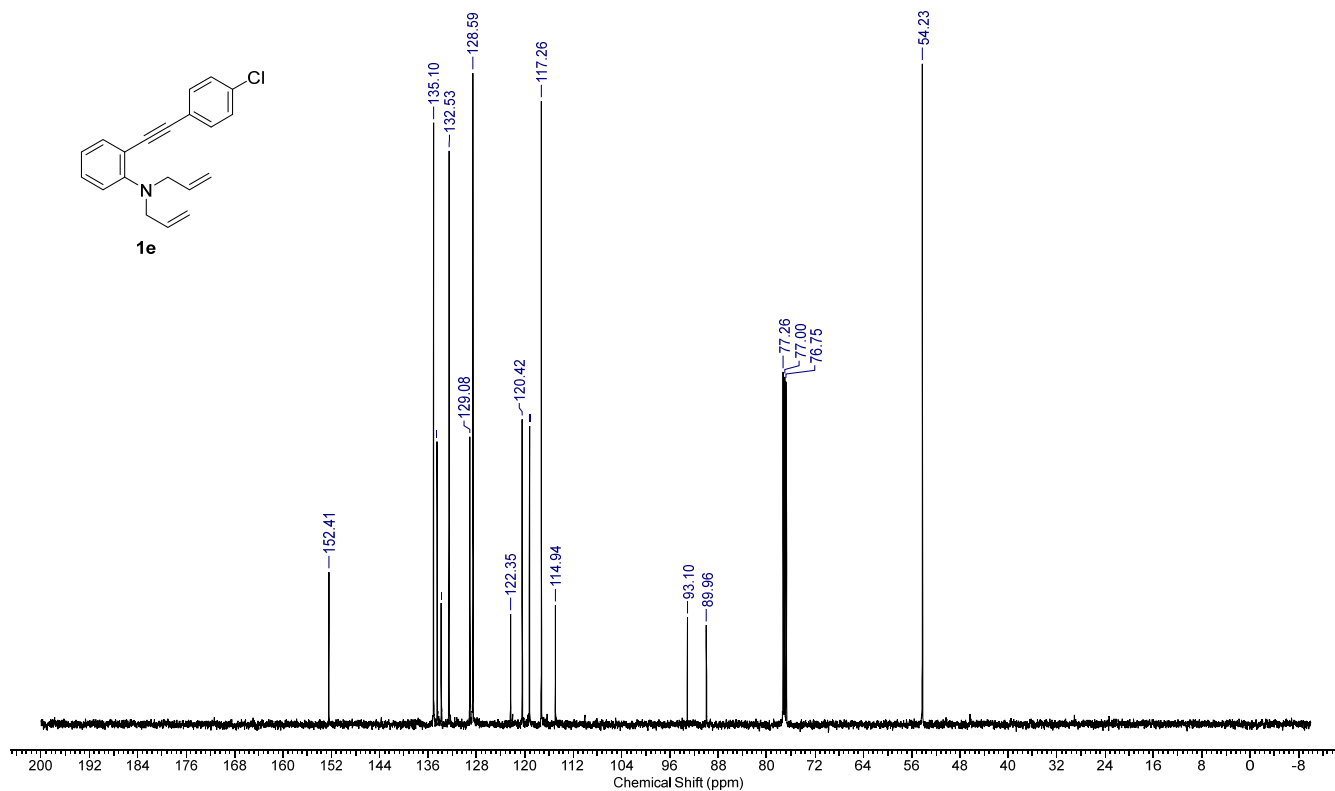

Enlarged view

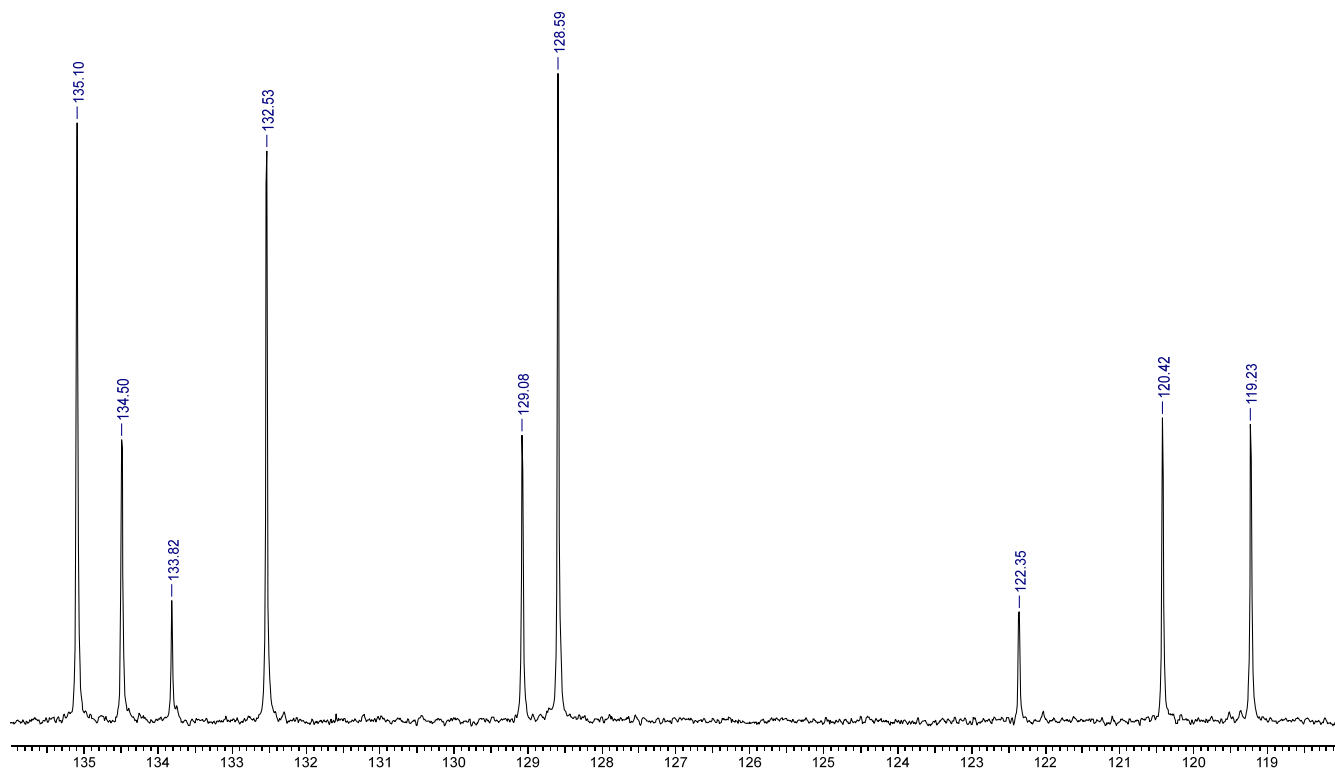

$^1\text{H}$  NMR (500 MHz,  $\text{CDCl}_3$ ) of **1f**

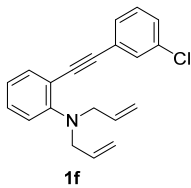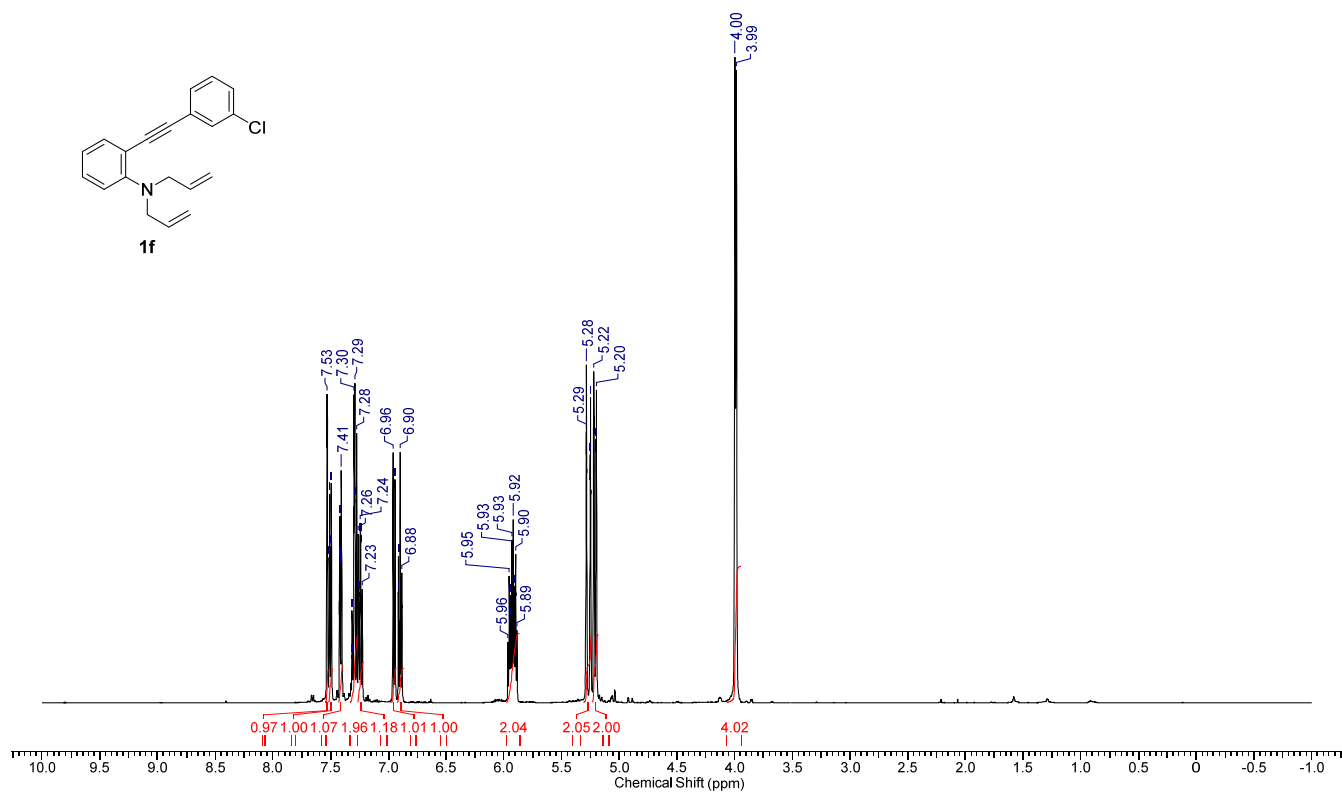

Enlarged view

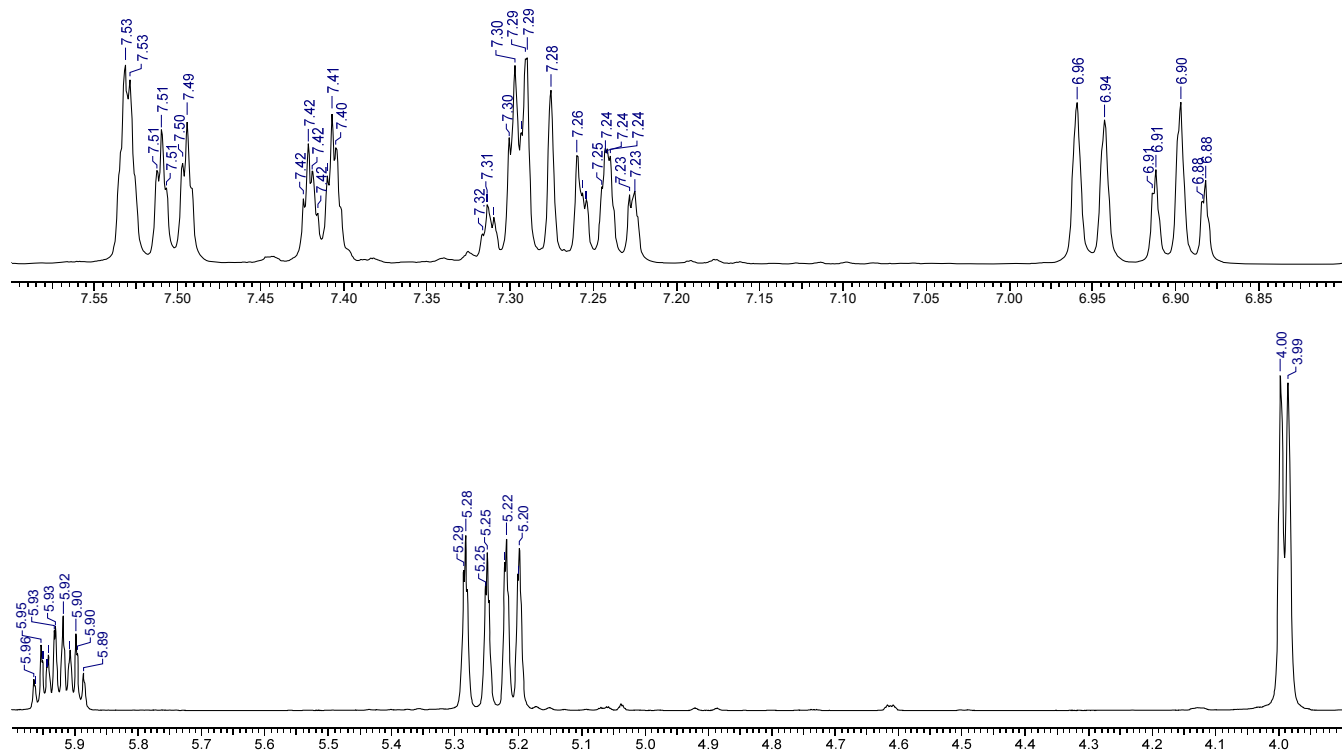

$^{13}\text{C}$  NMR (125 MHz,  $\text{CDCl}_3$ ) of **1f**

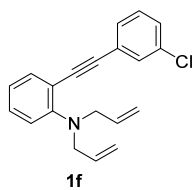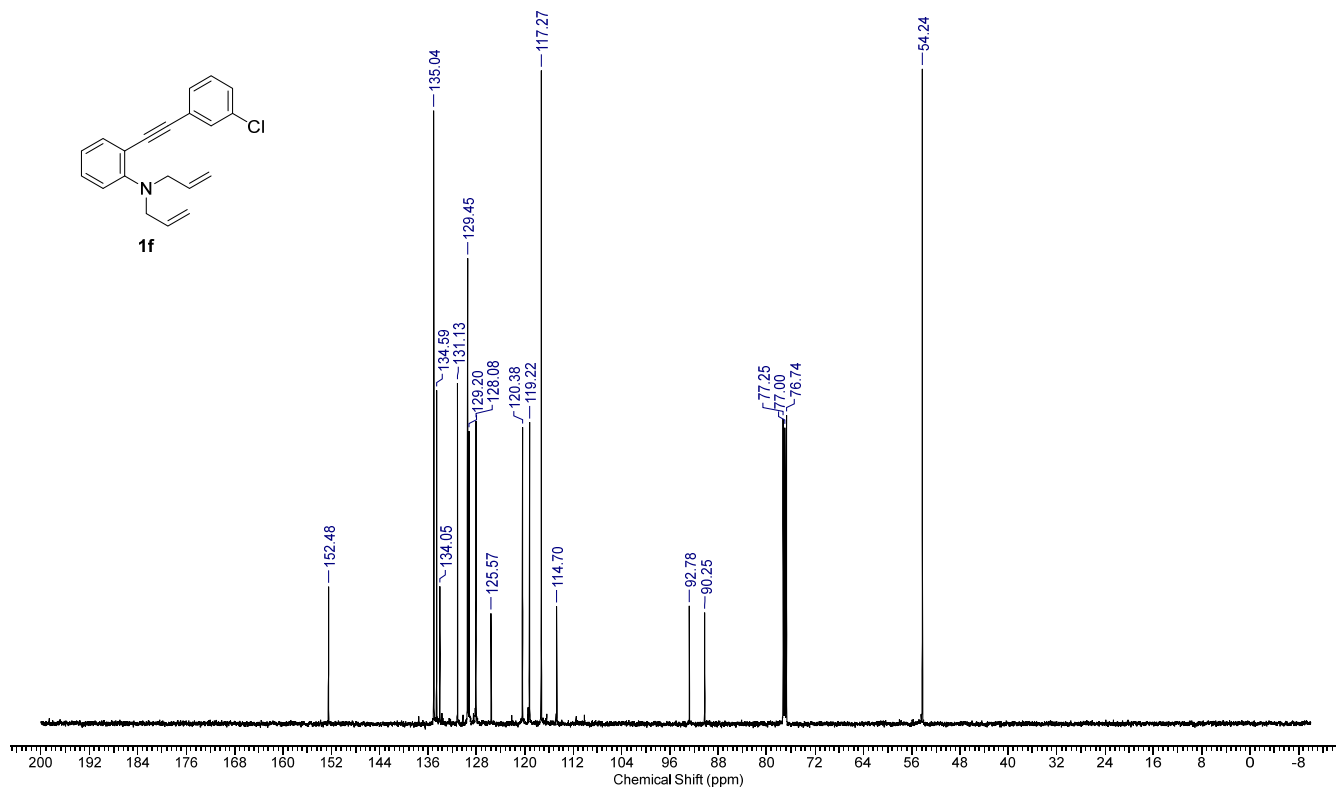

Enlarged view

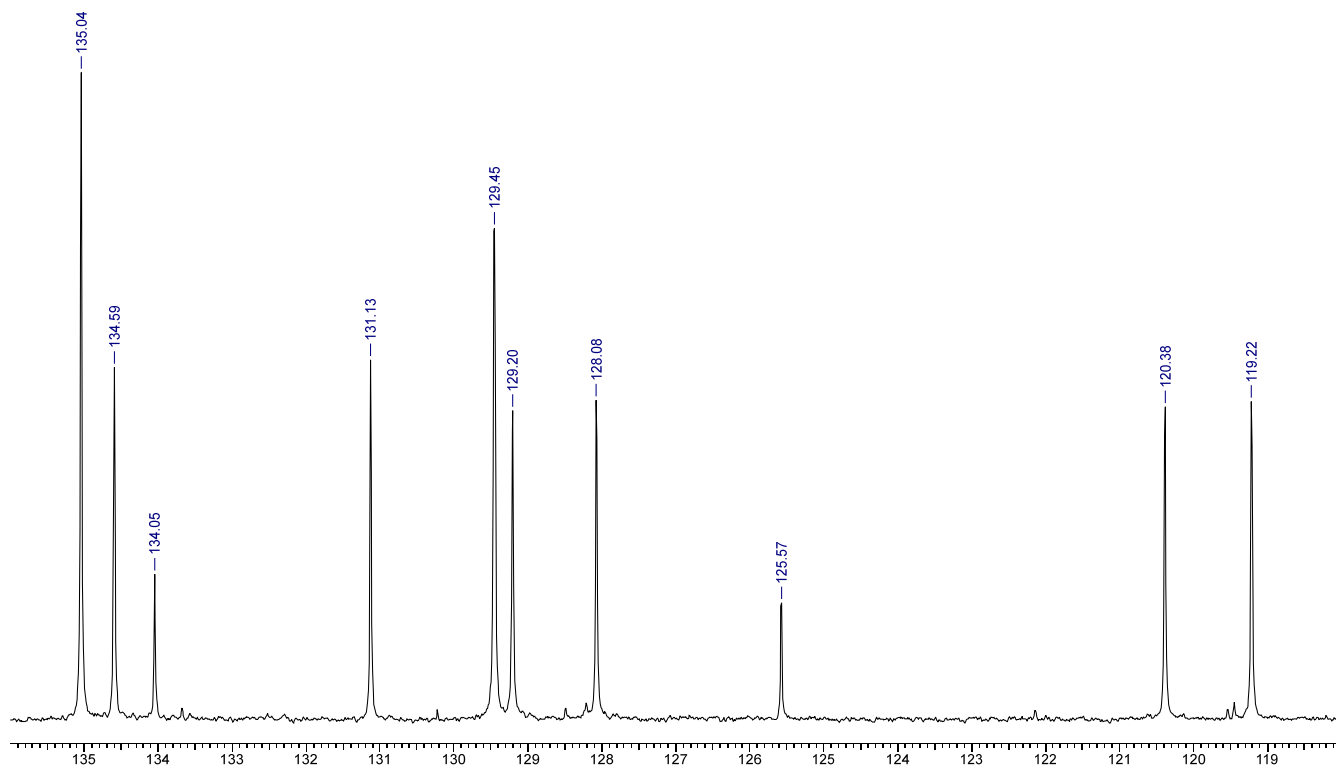

<sup>1</sup>H NMR (500 MHz, CDCl<sub>3</sub>) of **1g**

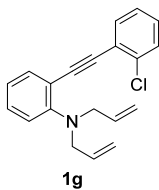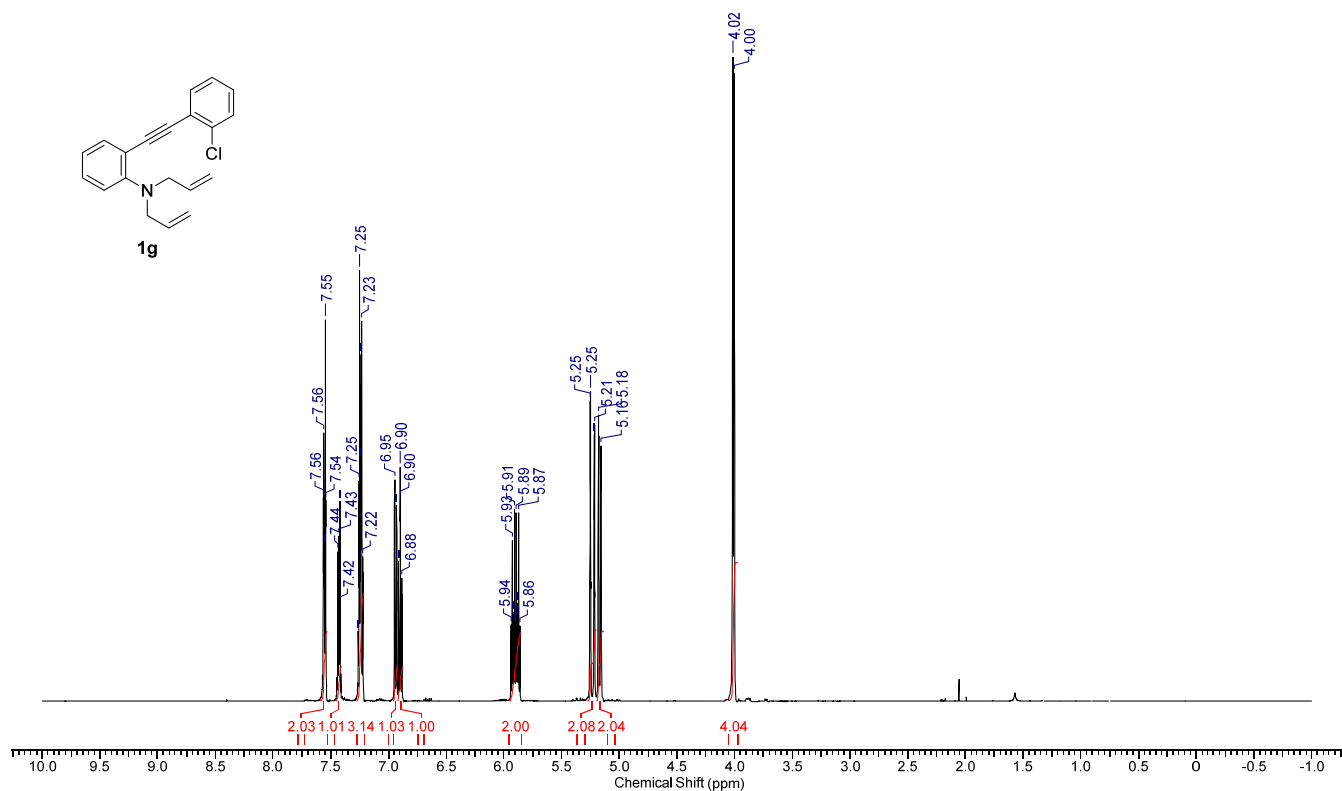

Enlarged view

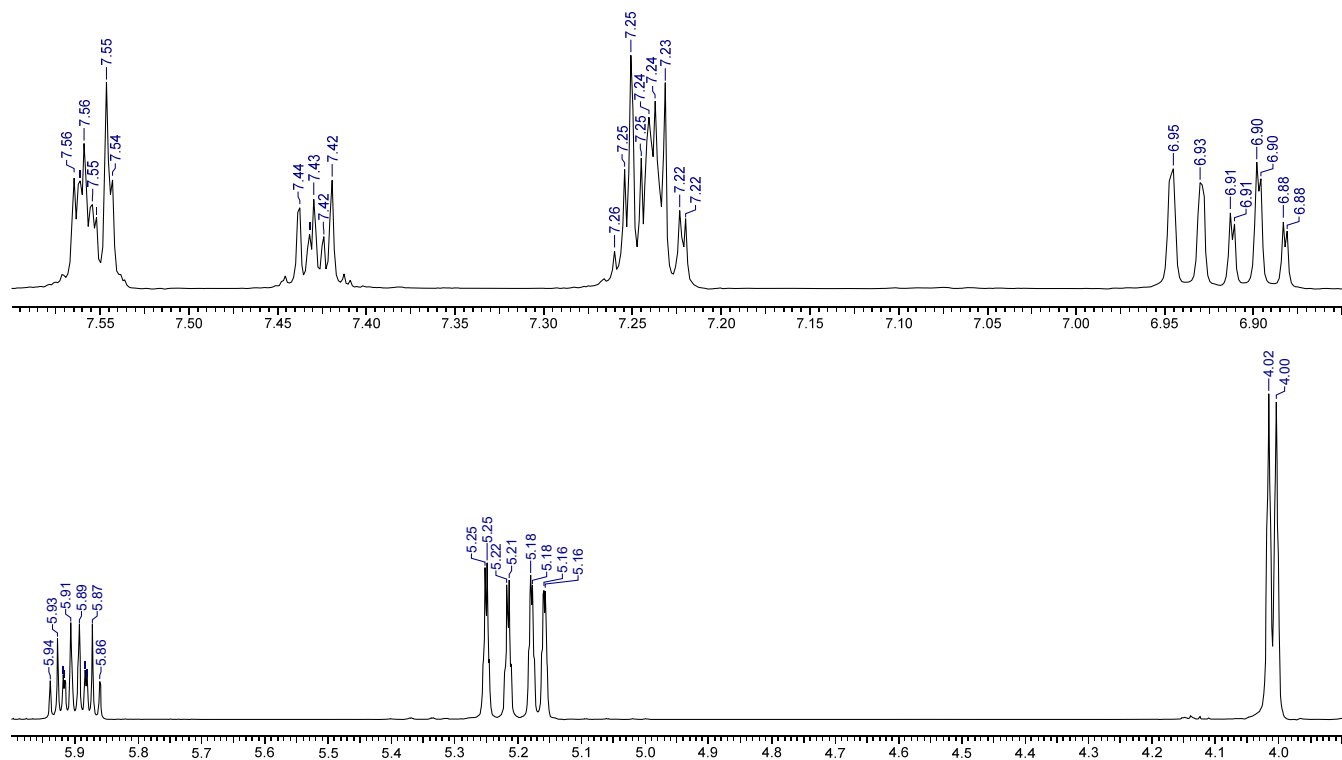

$^{13}\text{C}$  NMR (125 MHz,  $\text{CDCl}_3$ ) of **1g**

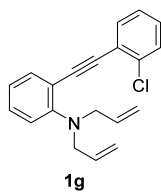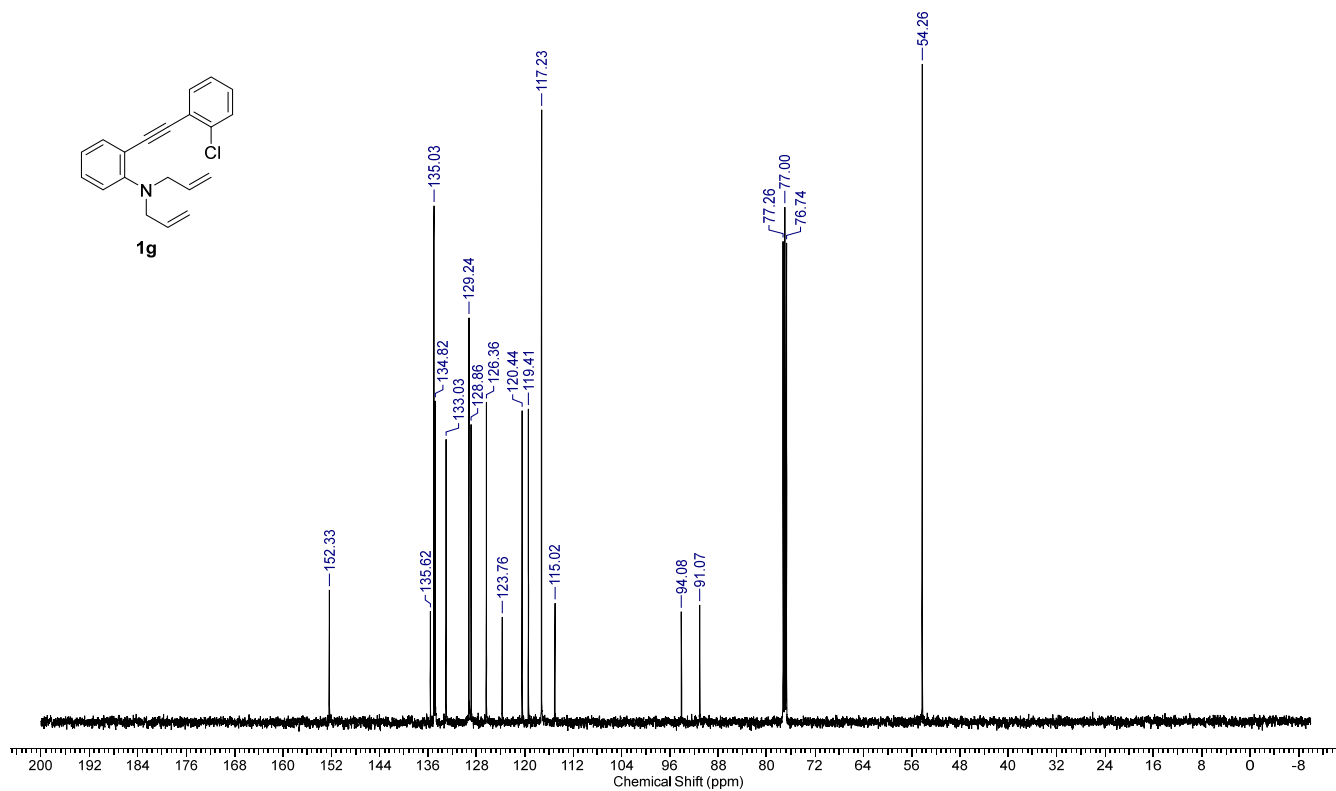

Enlarged view

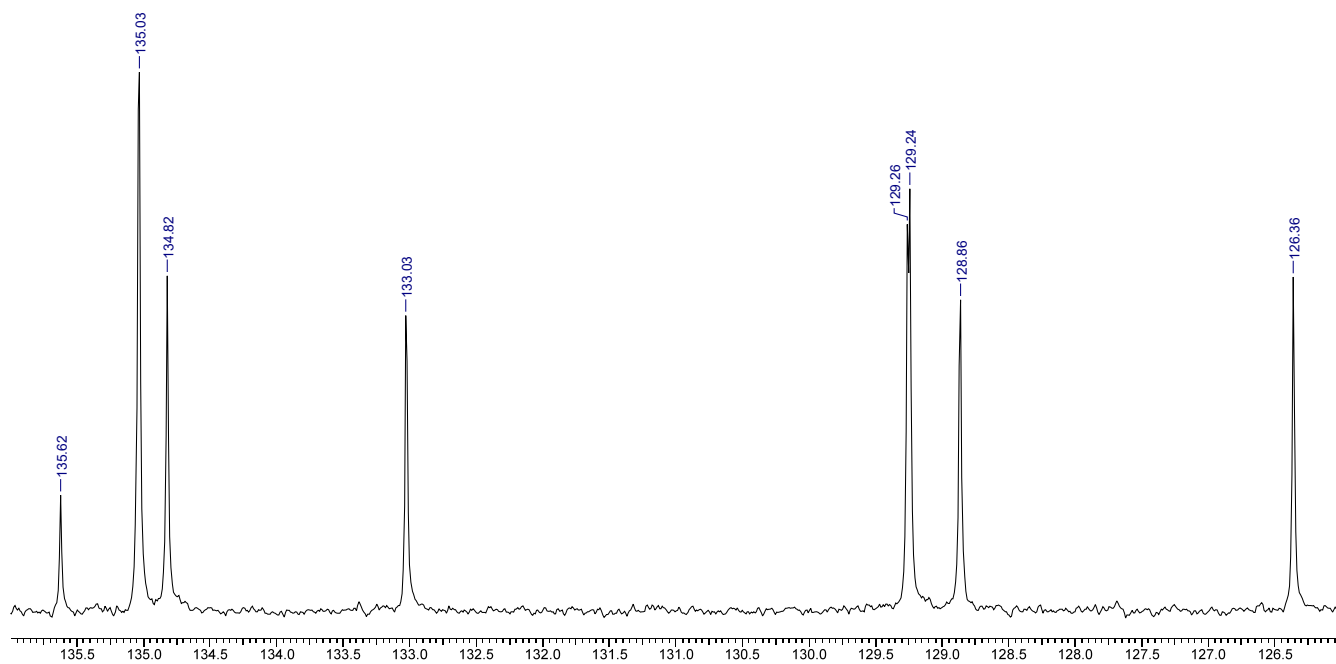

$^1\text{H}$  NMR (500 MHz,  $\text{CDCl}_3$ ) of **1h**

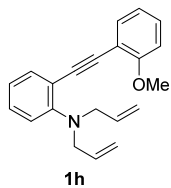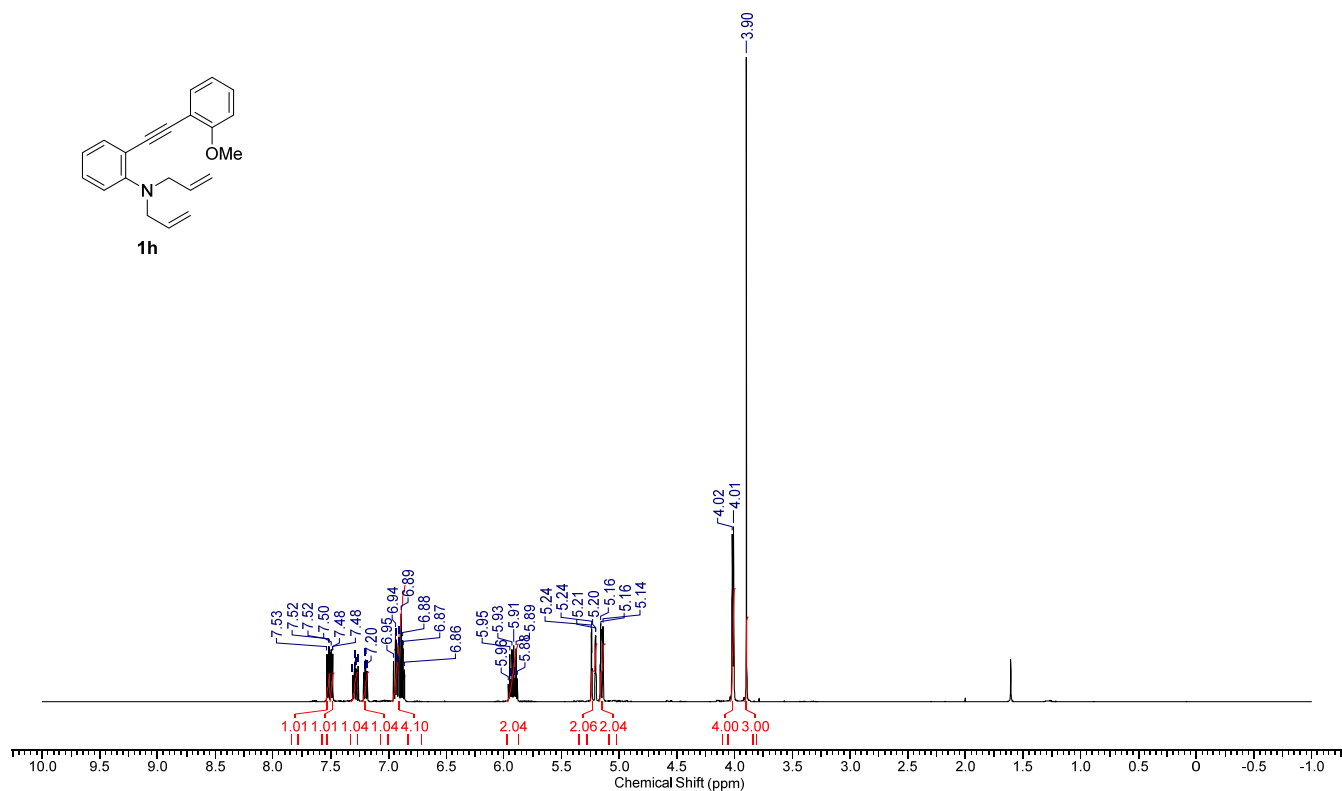

Enlarged view

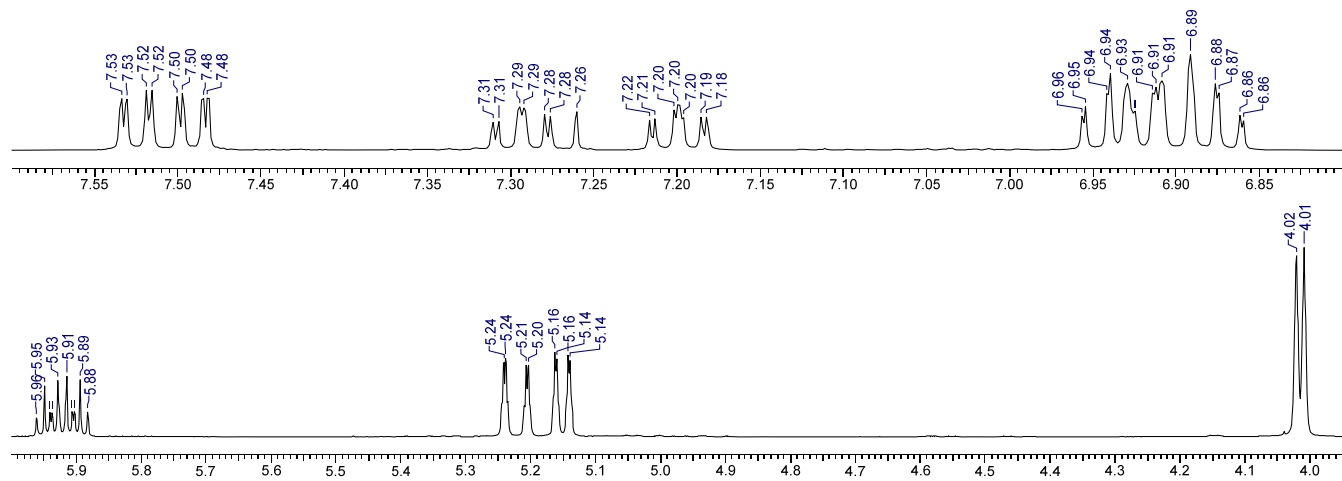

<sup>13</sup>C NMR (125 MHz, CDCl<sub>3</sub>) of **1h**

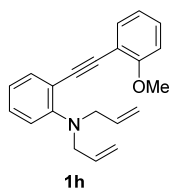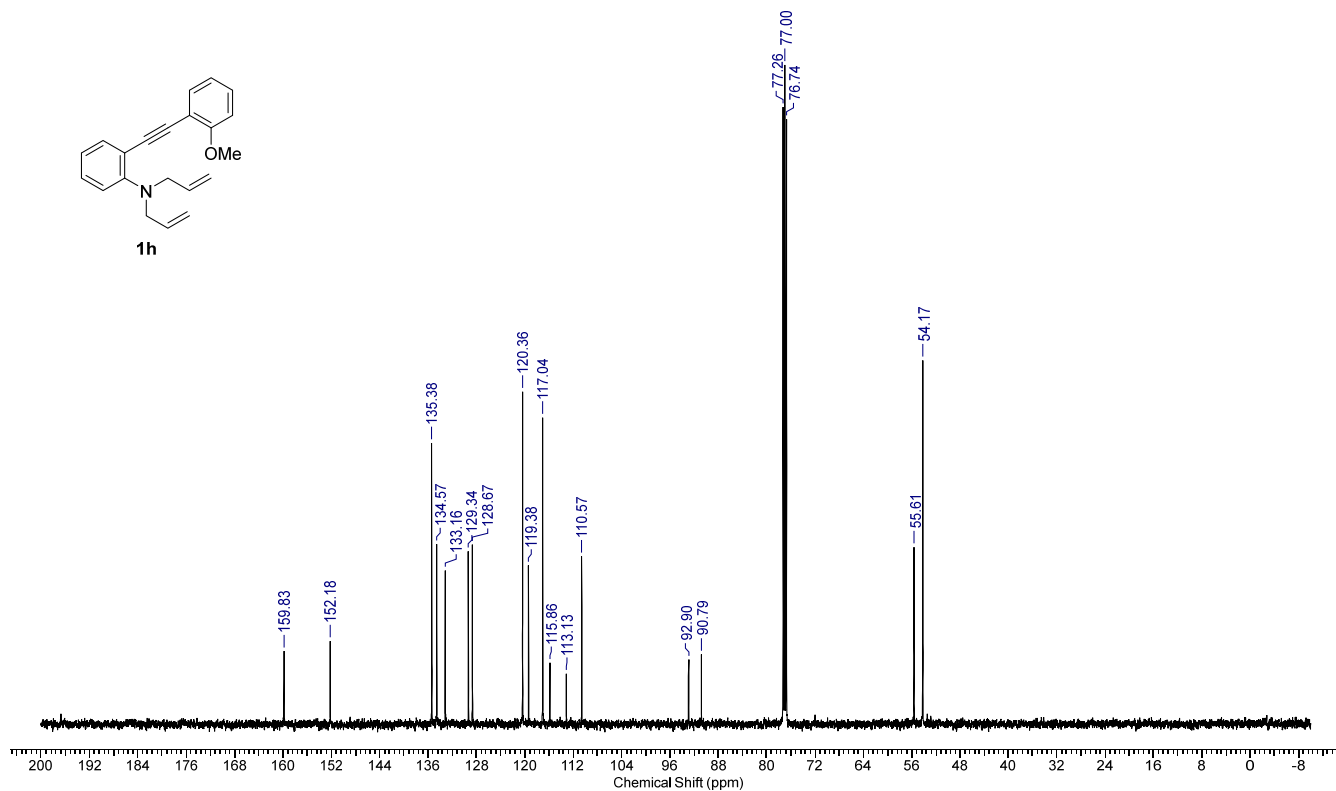

Enlarged view

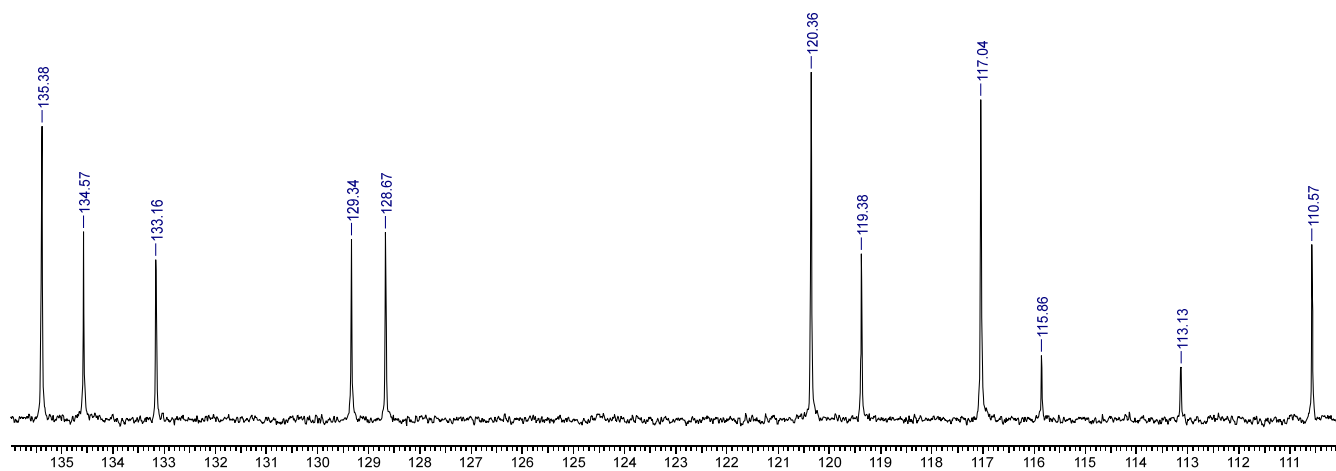



$^1\text{H}$  NMR (500 MHz,  $\text{CDCl}_3$ ) of **1i**

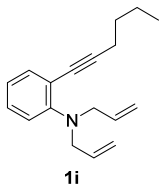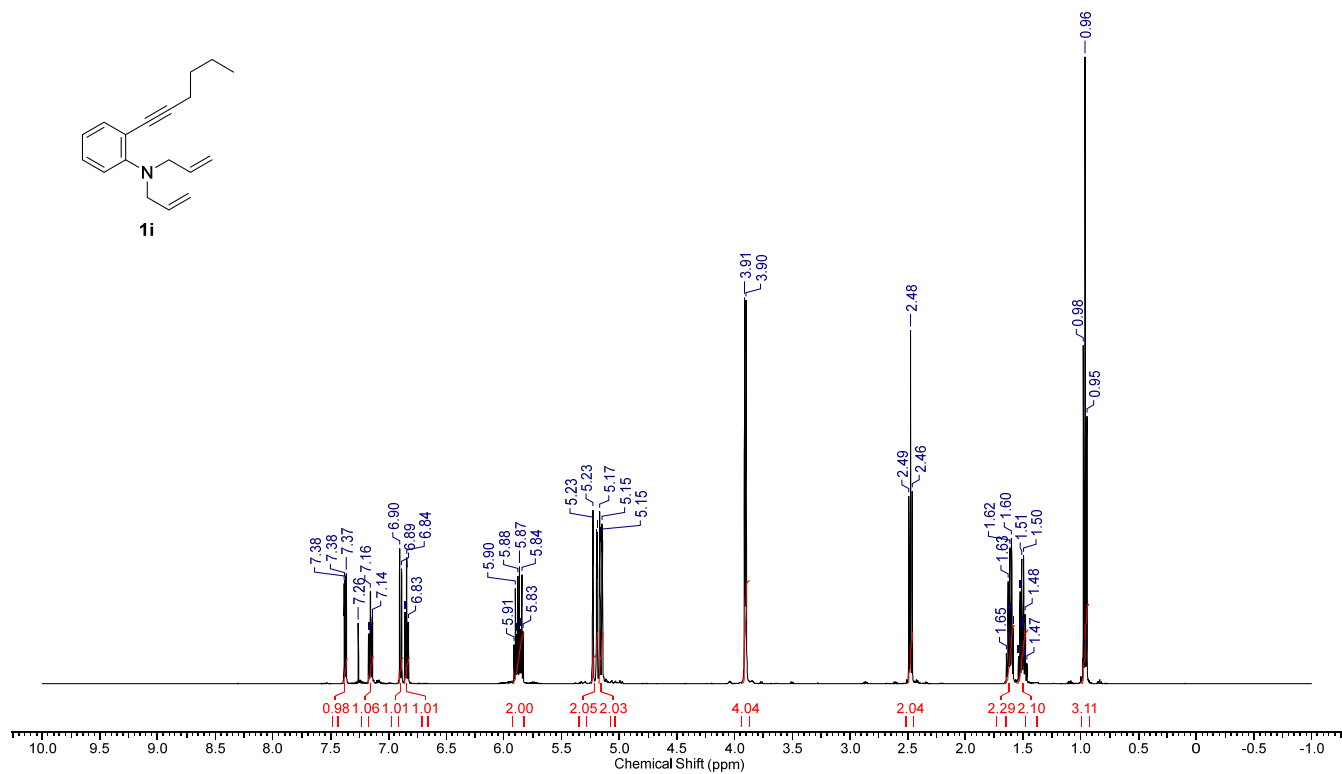

Enlarged view

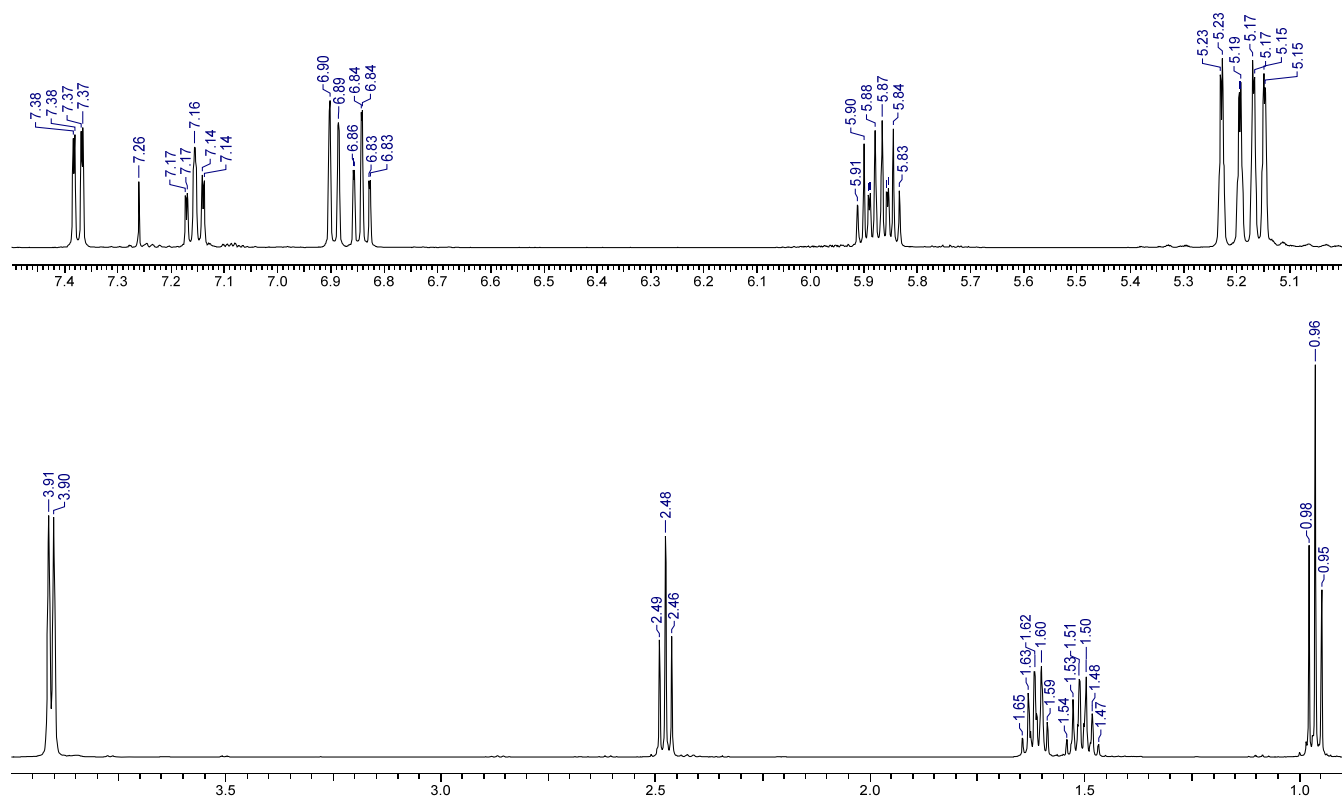

$^{13}\text{C}$  NMR (125 MHz,  $\text{CDCl}_3$ ) of **1i**

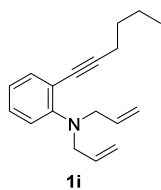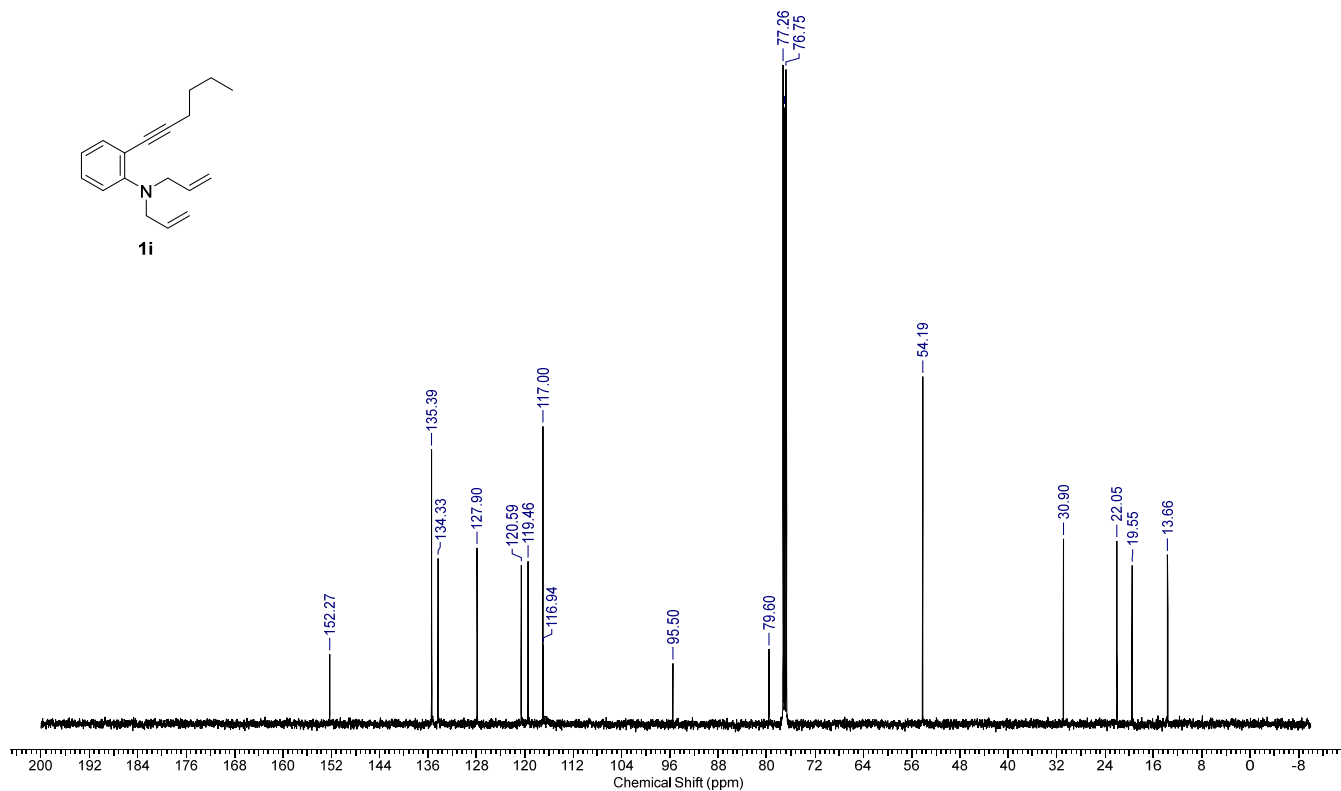

Enlarged view

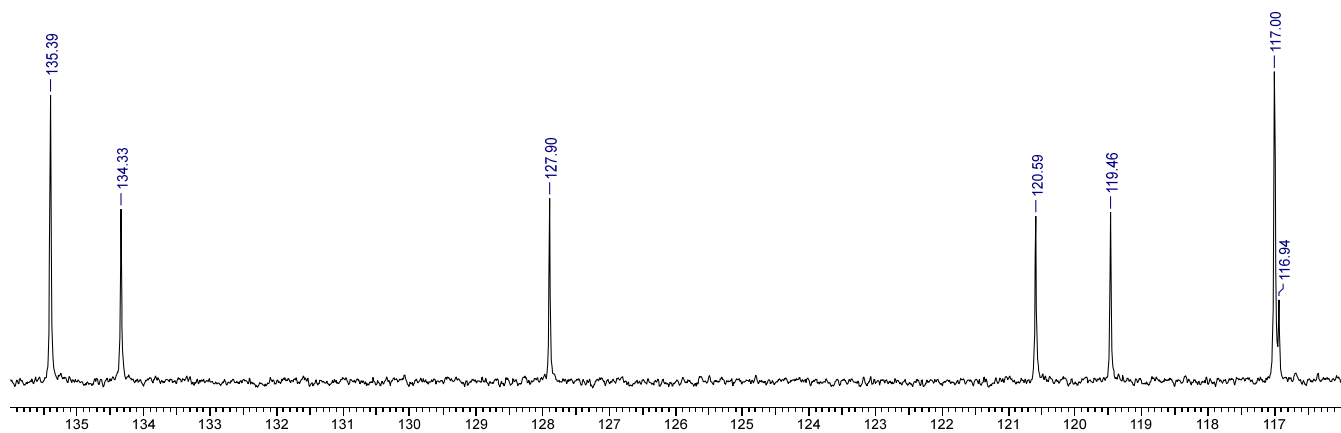

<sup>1</sup>H NMR (500 MHz, CDCl<sub>3</sub>) of **1j**

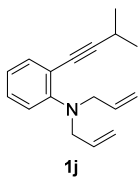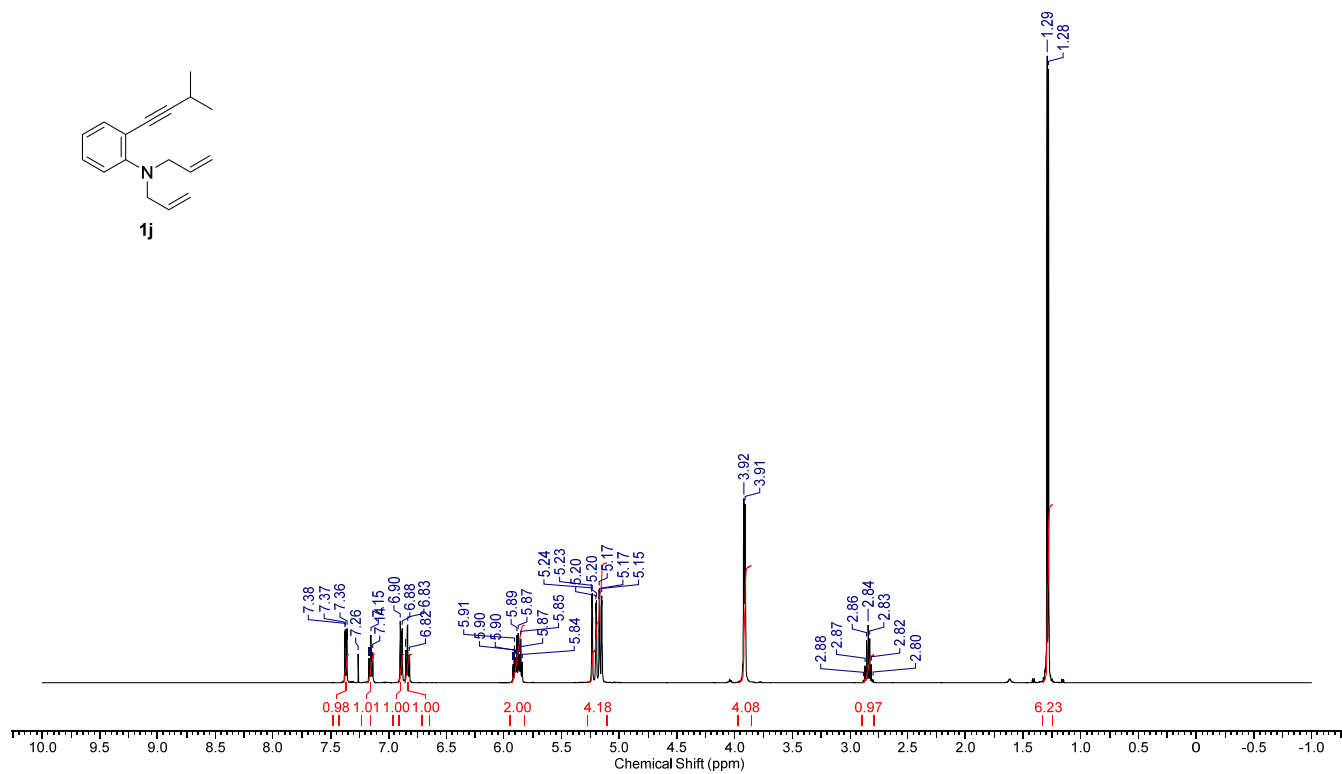

Enlarged view

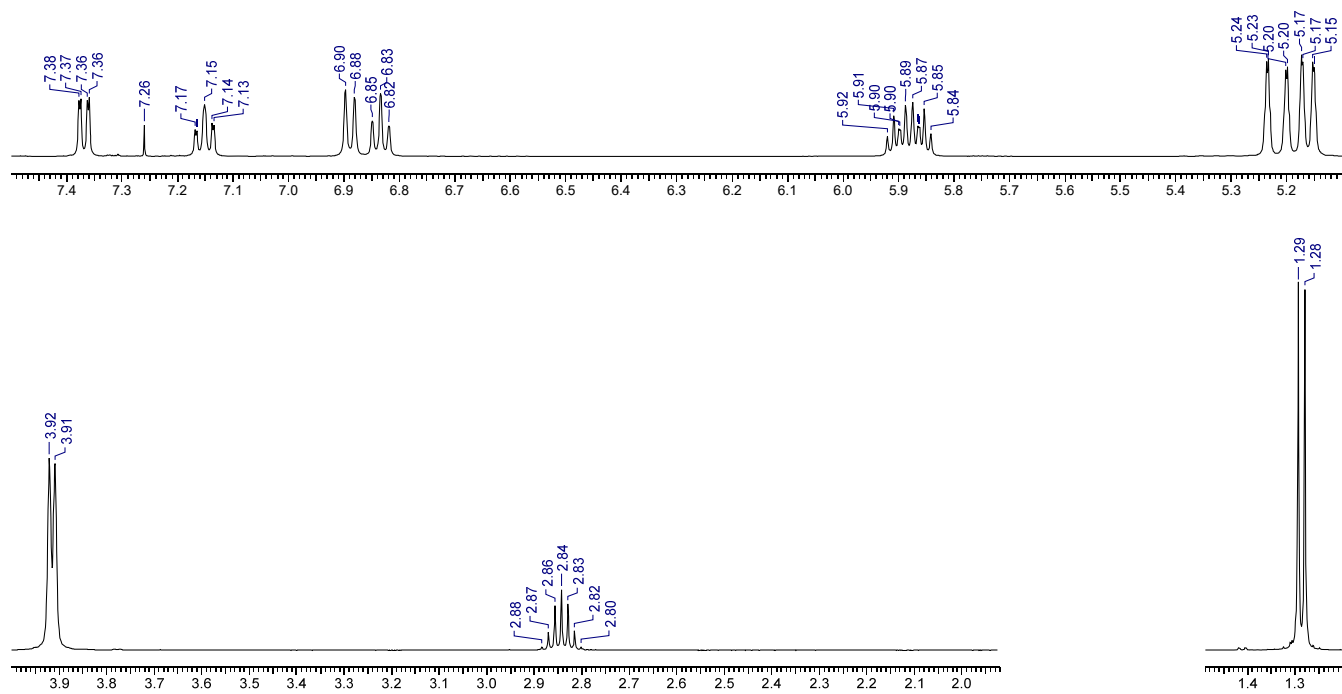

$^{13}\text{C}$  NMR (125 MHz,  $\text{CDCl}_3$ ) of **1j**

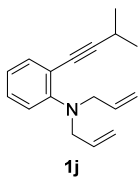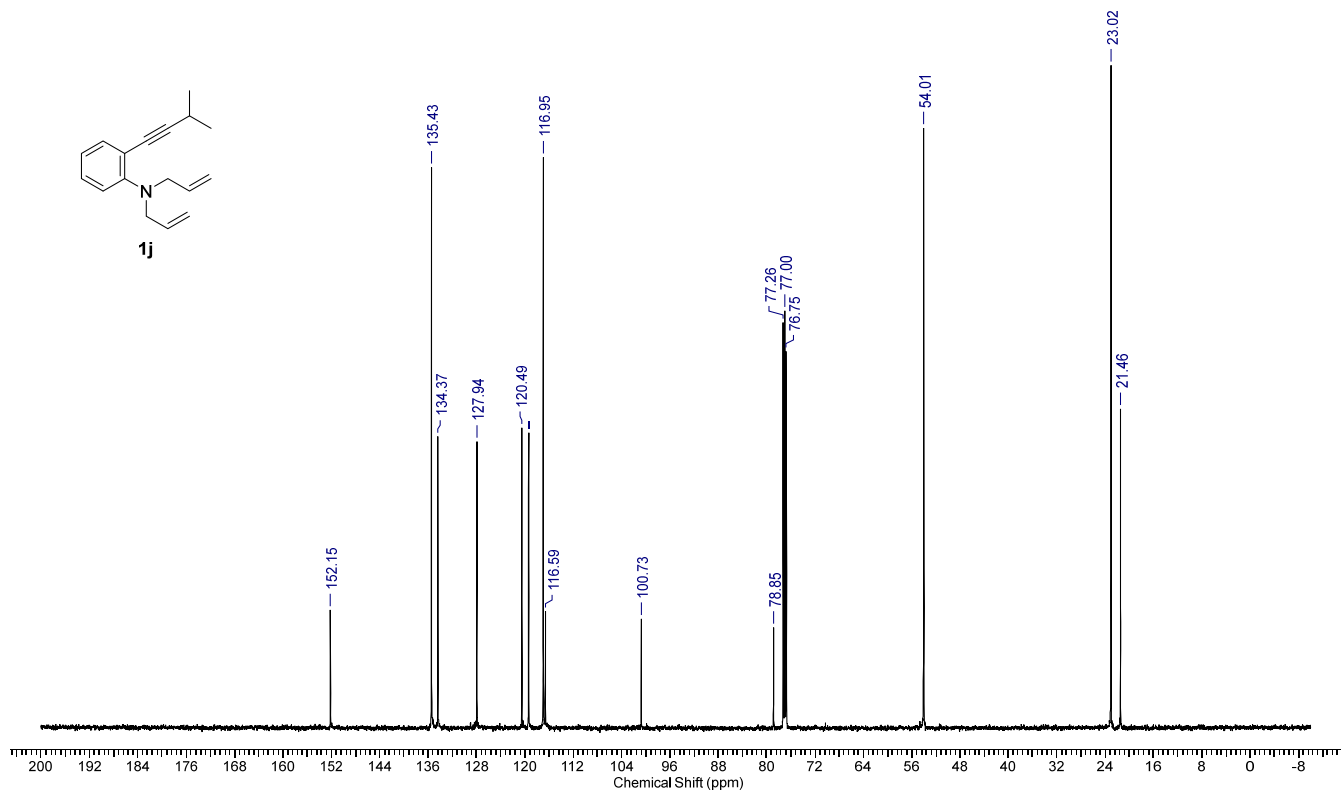

Enlarged view

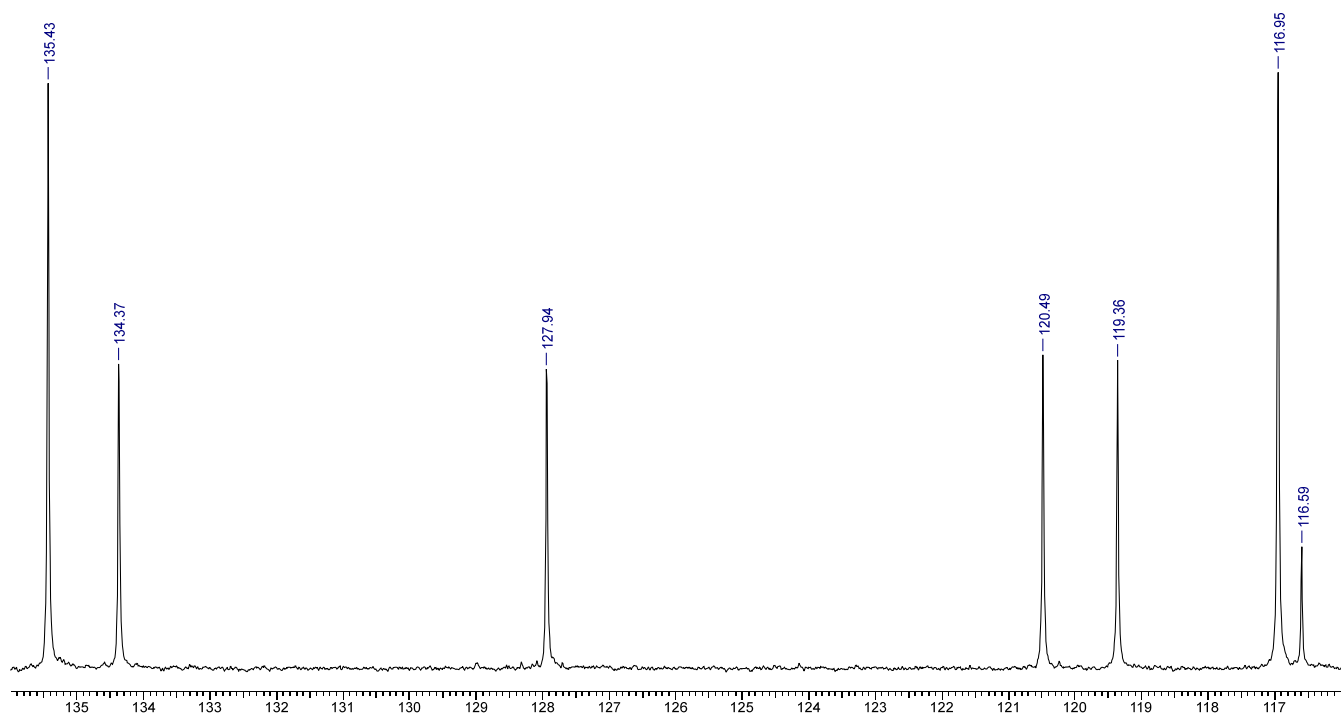

<sup>1</sup>H NMR (500 MHz, CDCl<sub>3</sub>) of **1k**

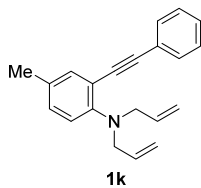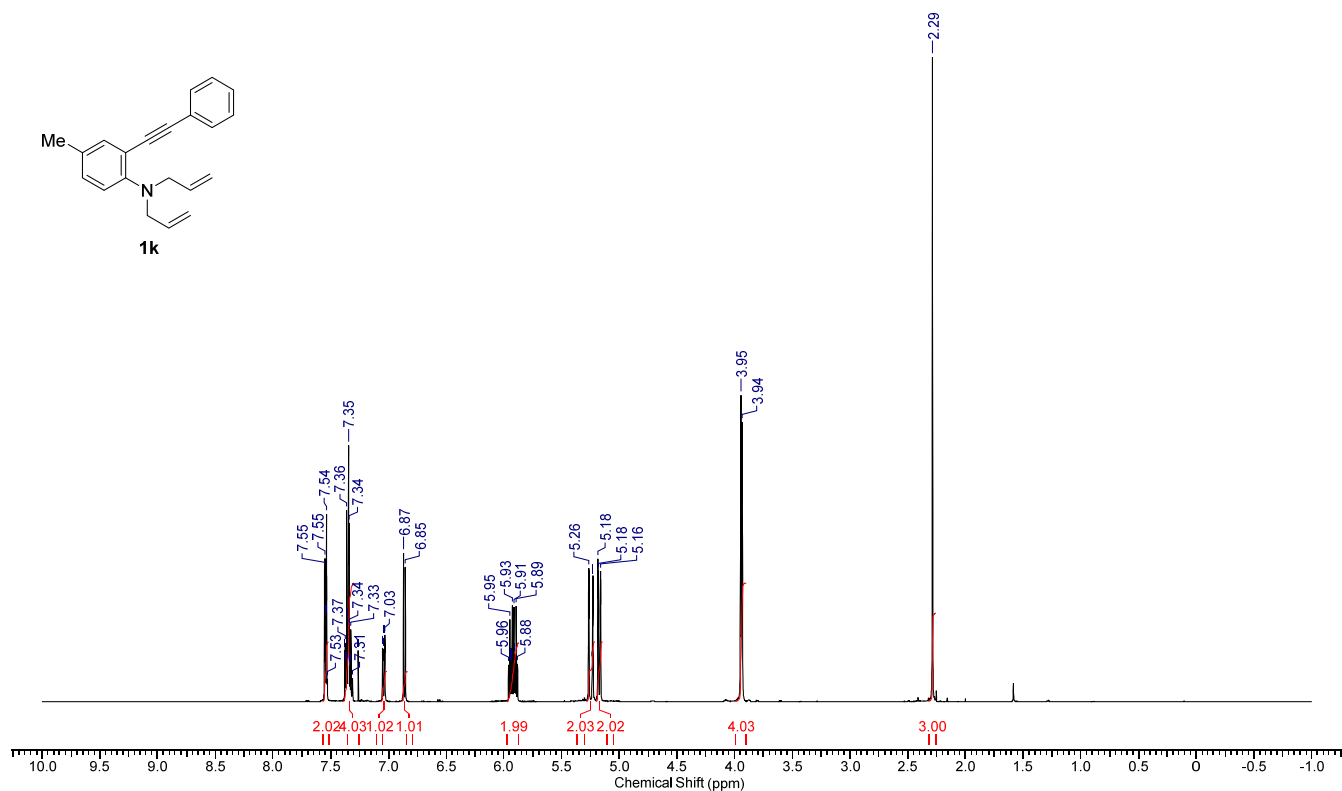

Enlarged view

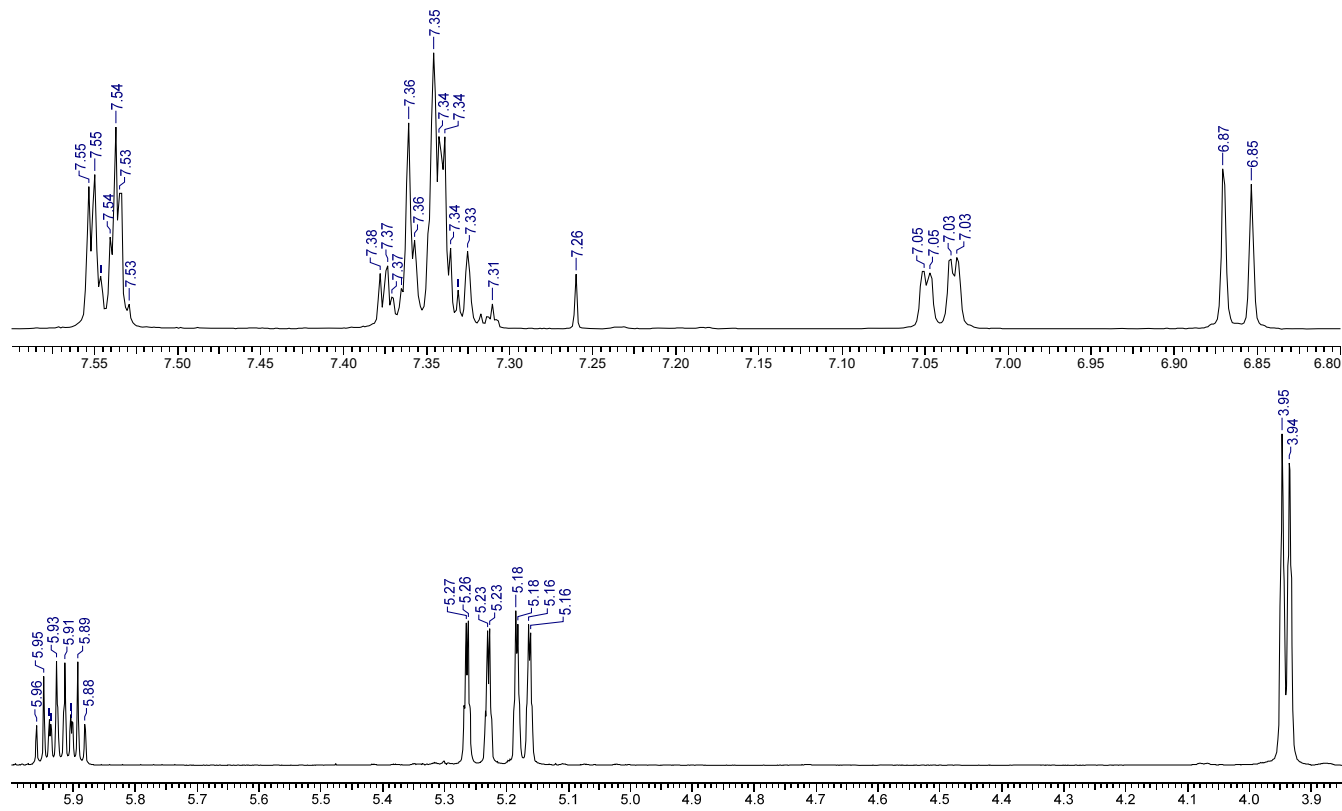

$^{13}\text{C}$  NMR (125 MHz,  $\text{CDCl}_3$ ) of **1k**

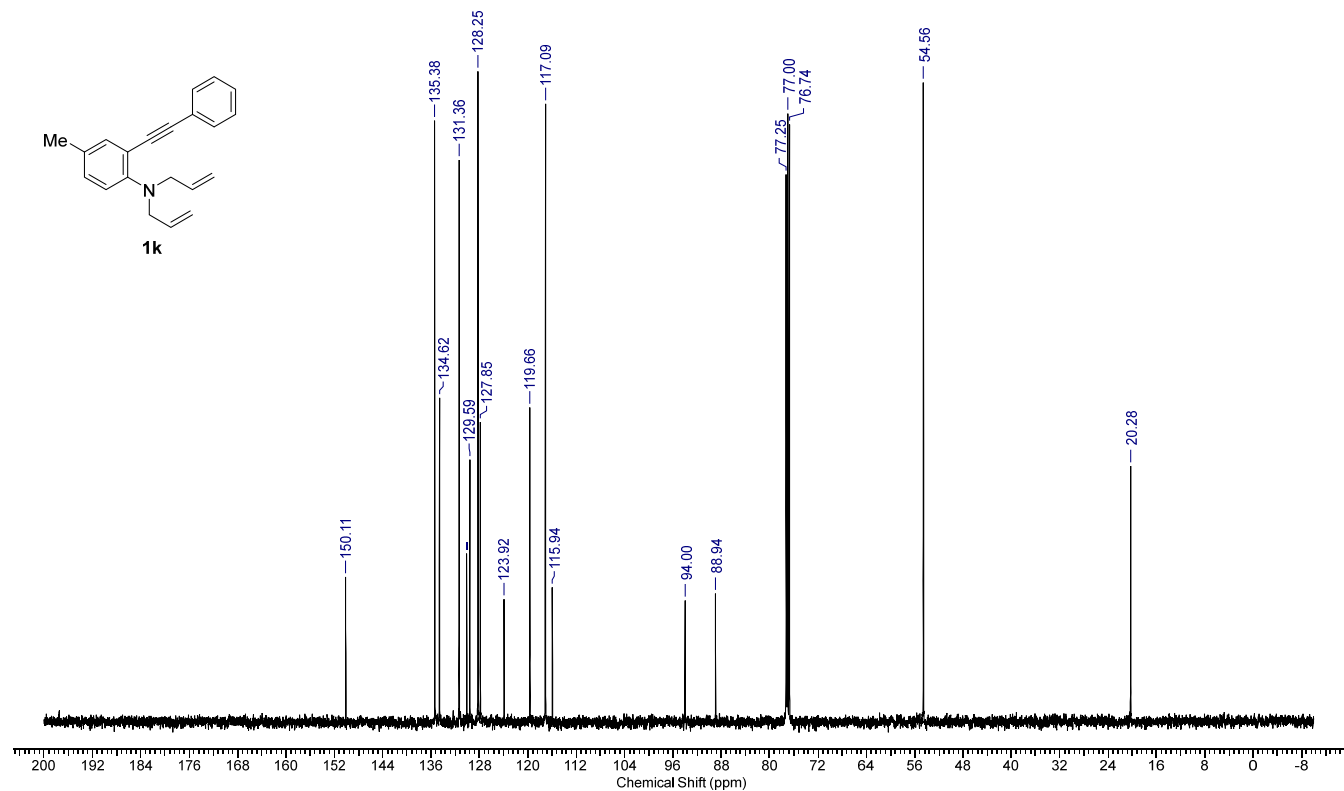

Enlarged view

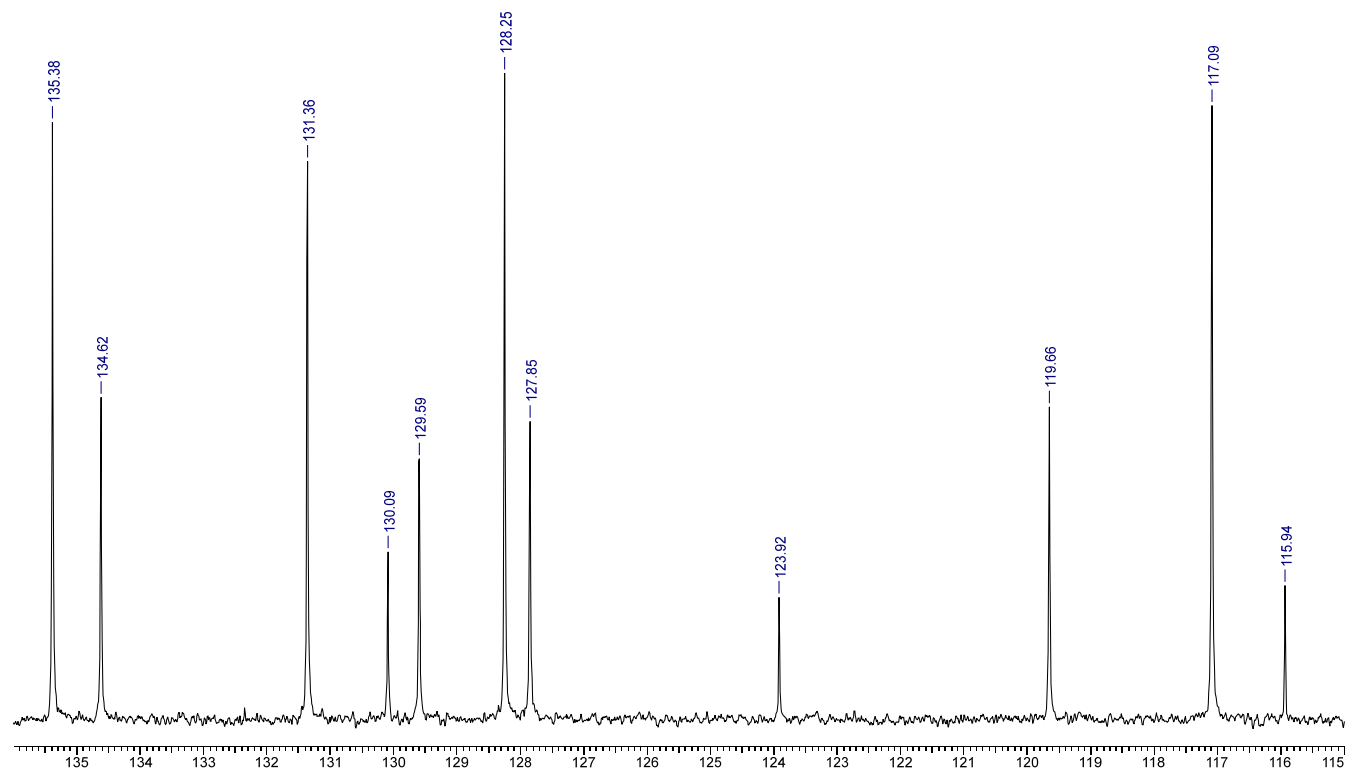

<sup>1</sup>H NMR (500 MHz, CDCl<sub>3</sub>) of **11**

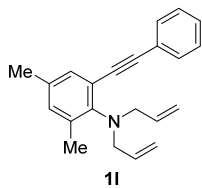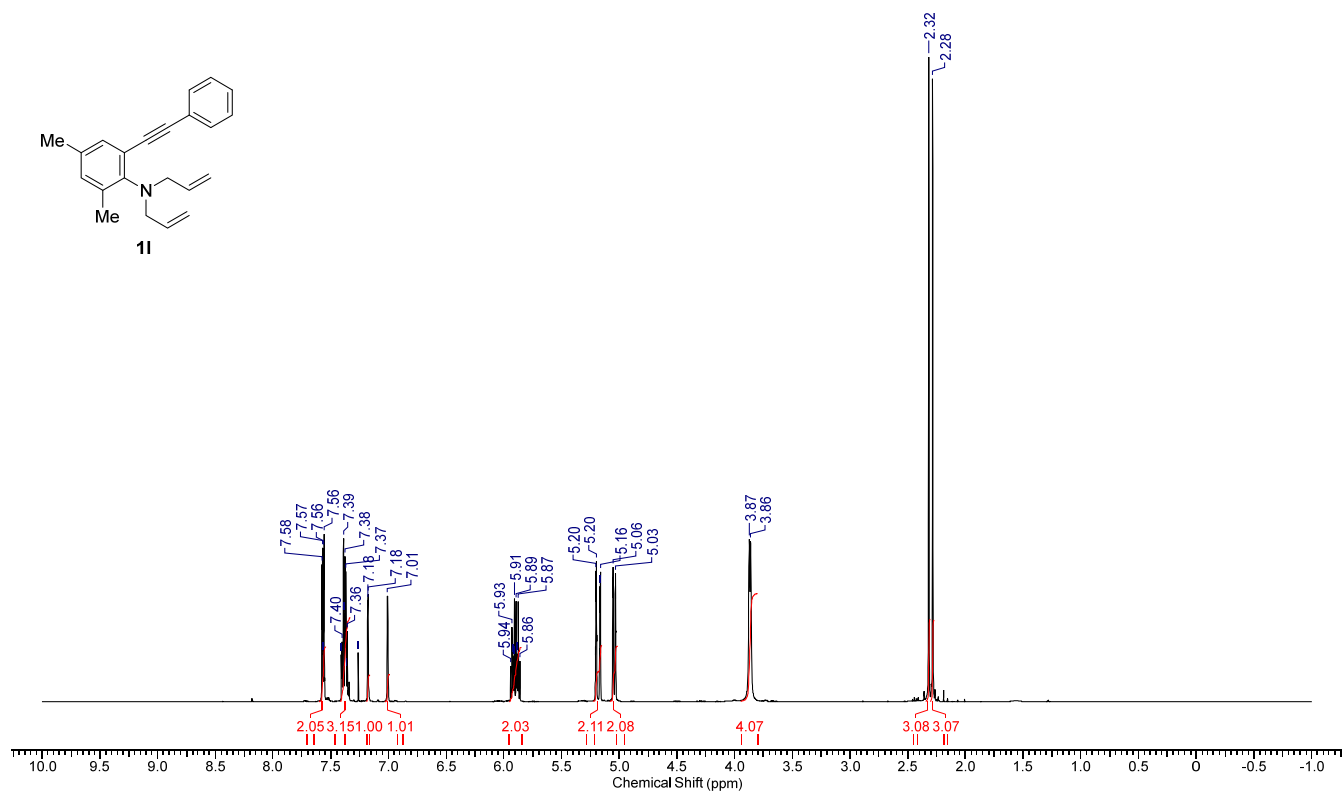

Enlarged view

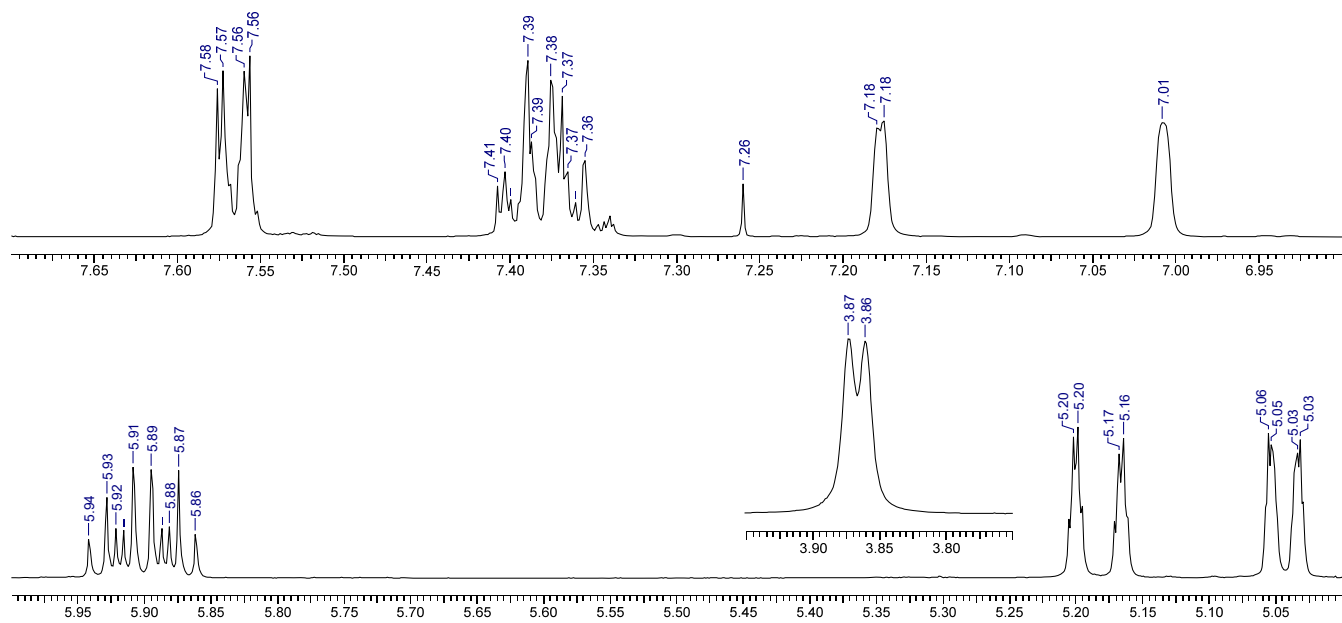

<sup>13</sup>C NMR (125 MHz, CDCl<sub>3</sub>) of **11**

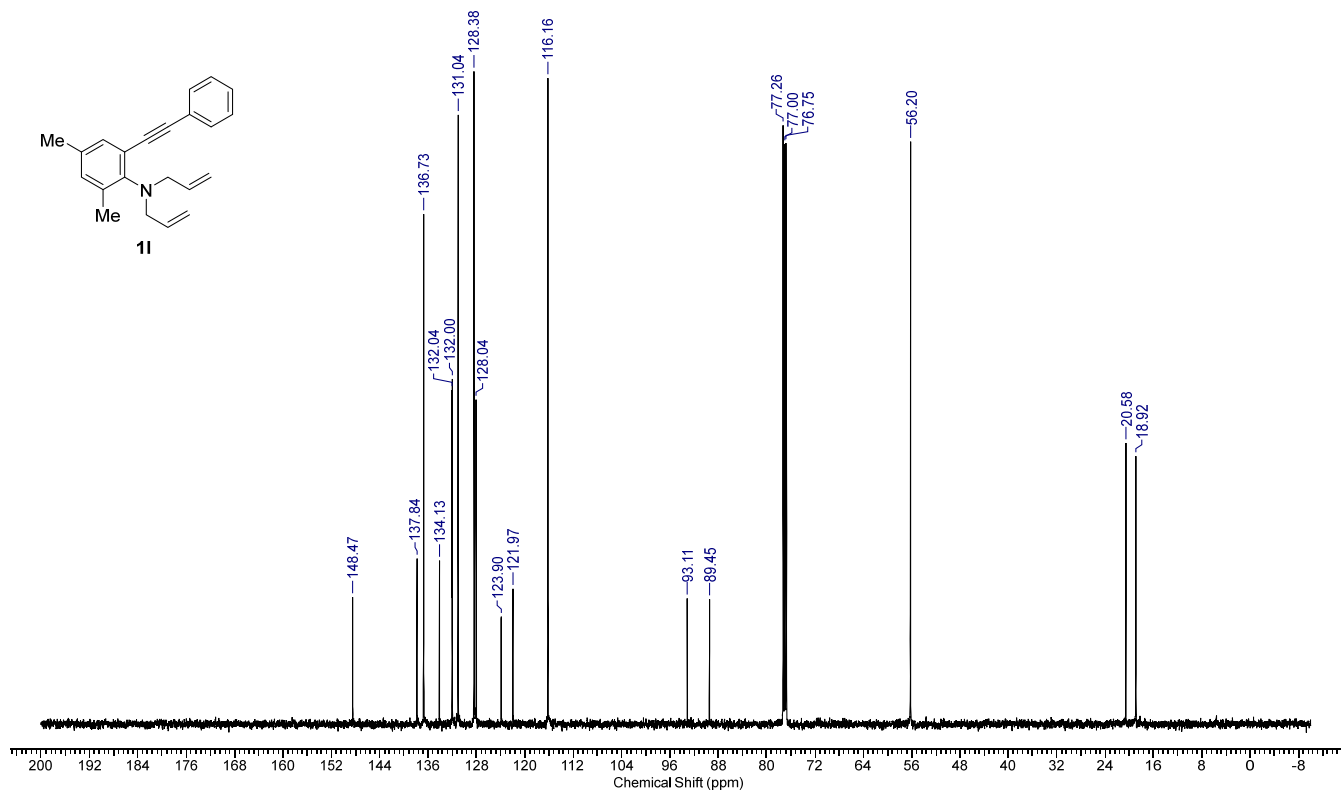

Enlarged view

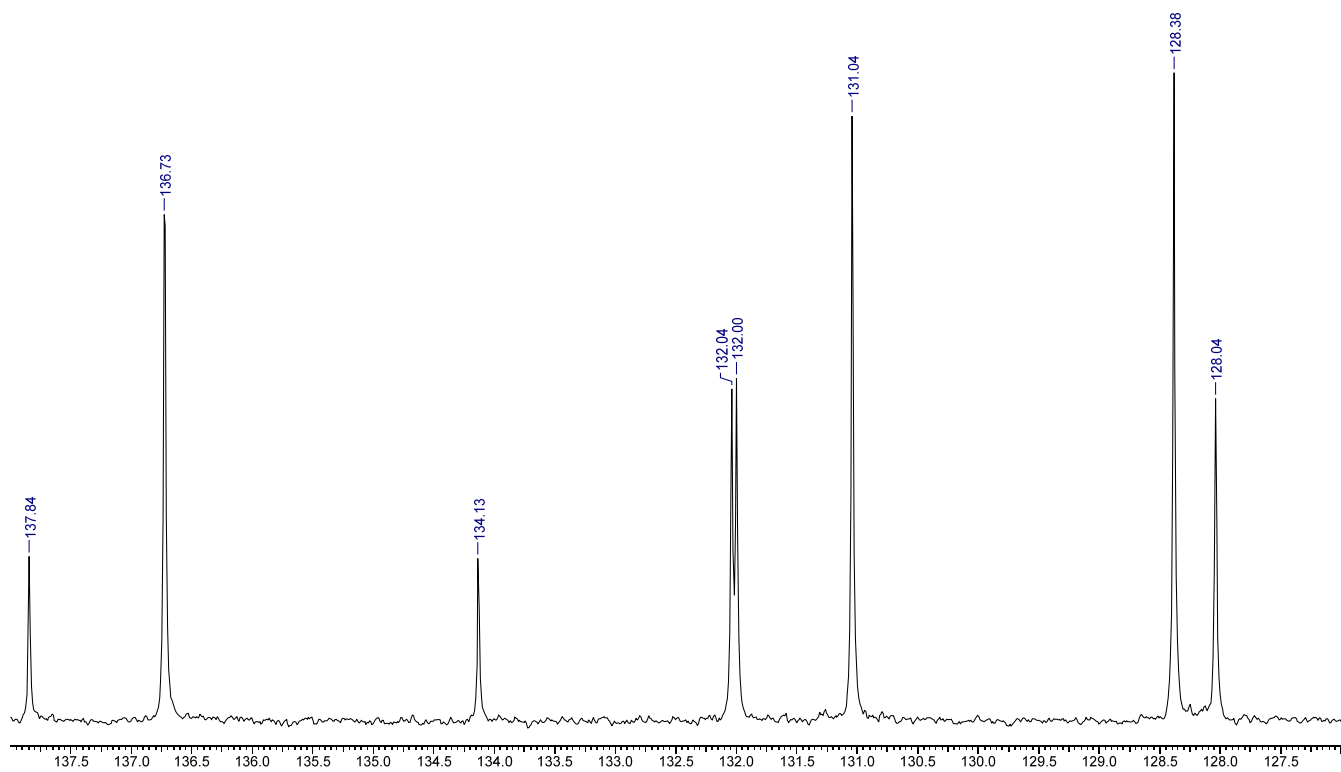



<sup>1</sup>H NMR (500 MHz, CDCl<sub>3</sub>) of **1m**

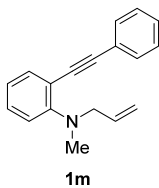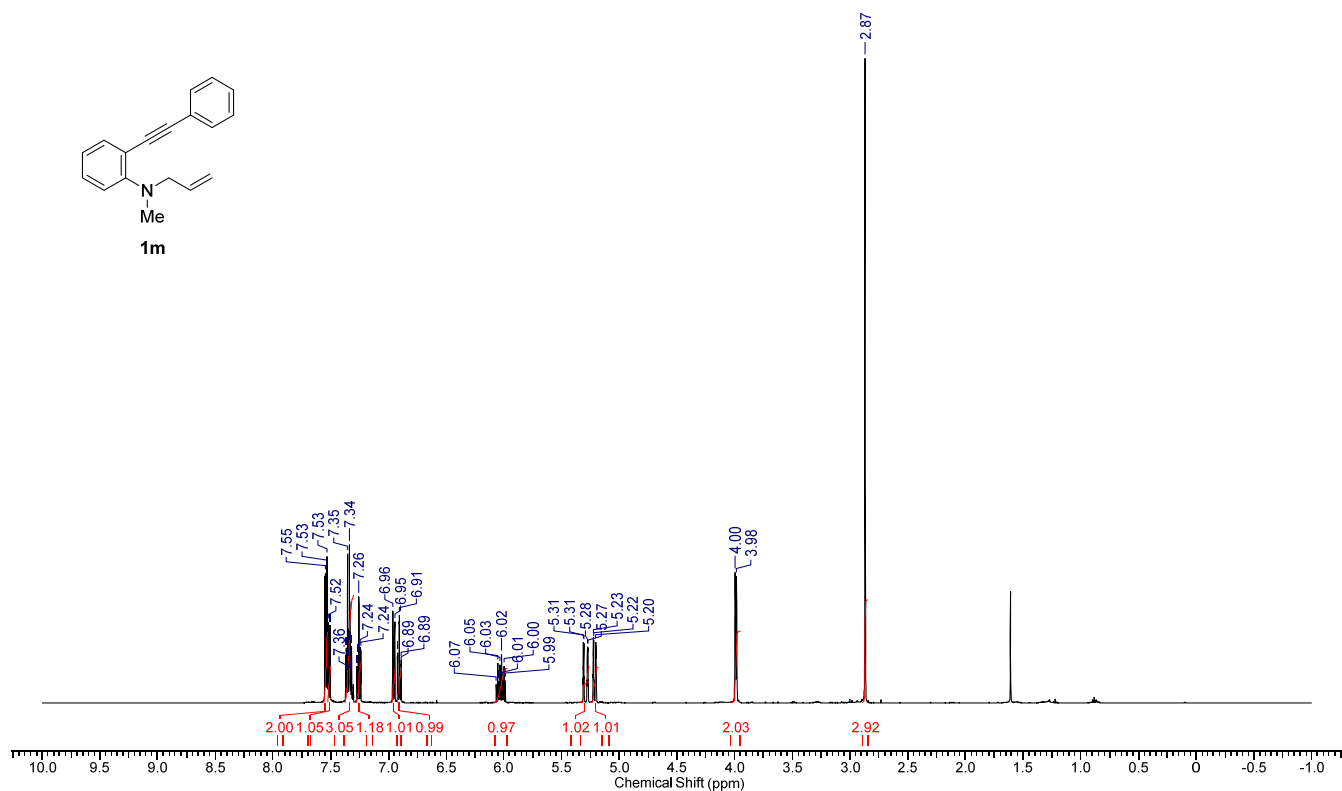

Enlarged view

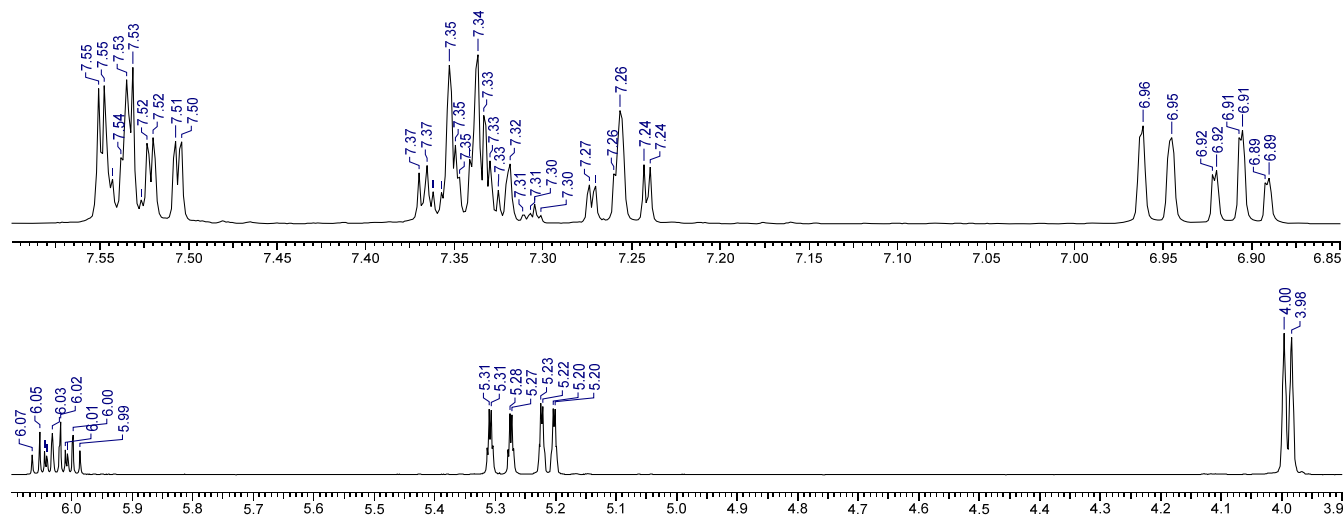

$^{13}\text{C}$  NMR (125 MHz,  $\text{CDCl}_3$ ) of **1m**

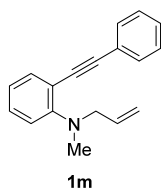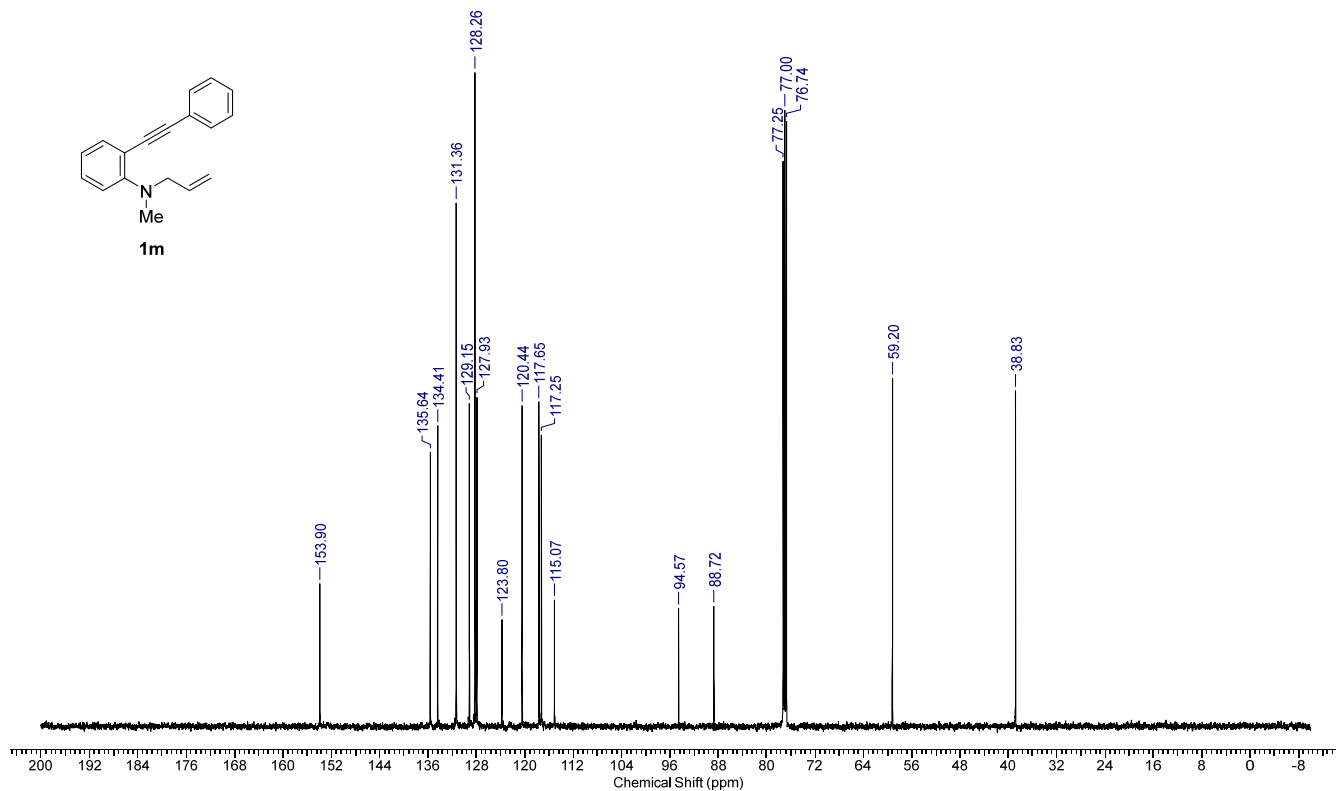

Enlarged view

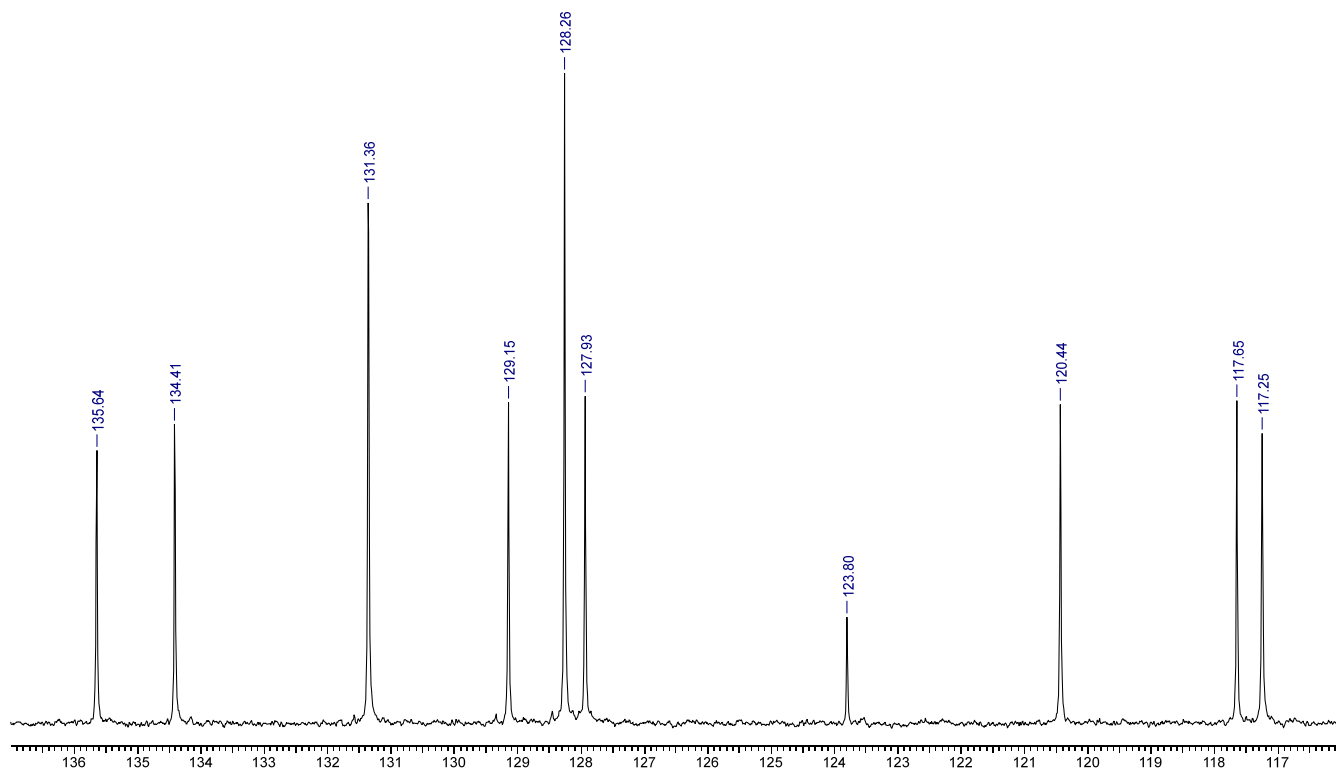

$^1\text{H}$  NMR (500 MHz,  $\text{CDCl}_3$ ) of **1n**

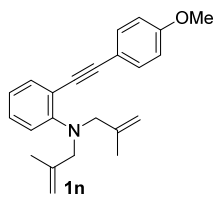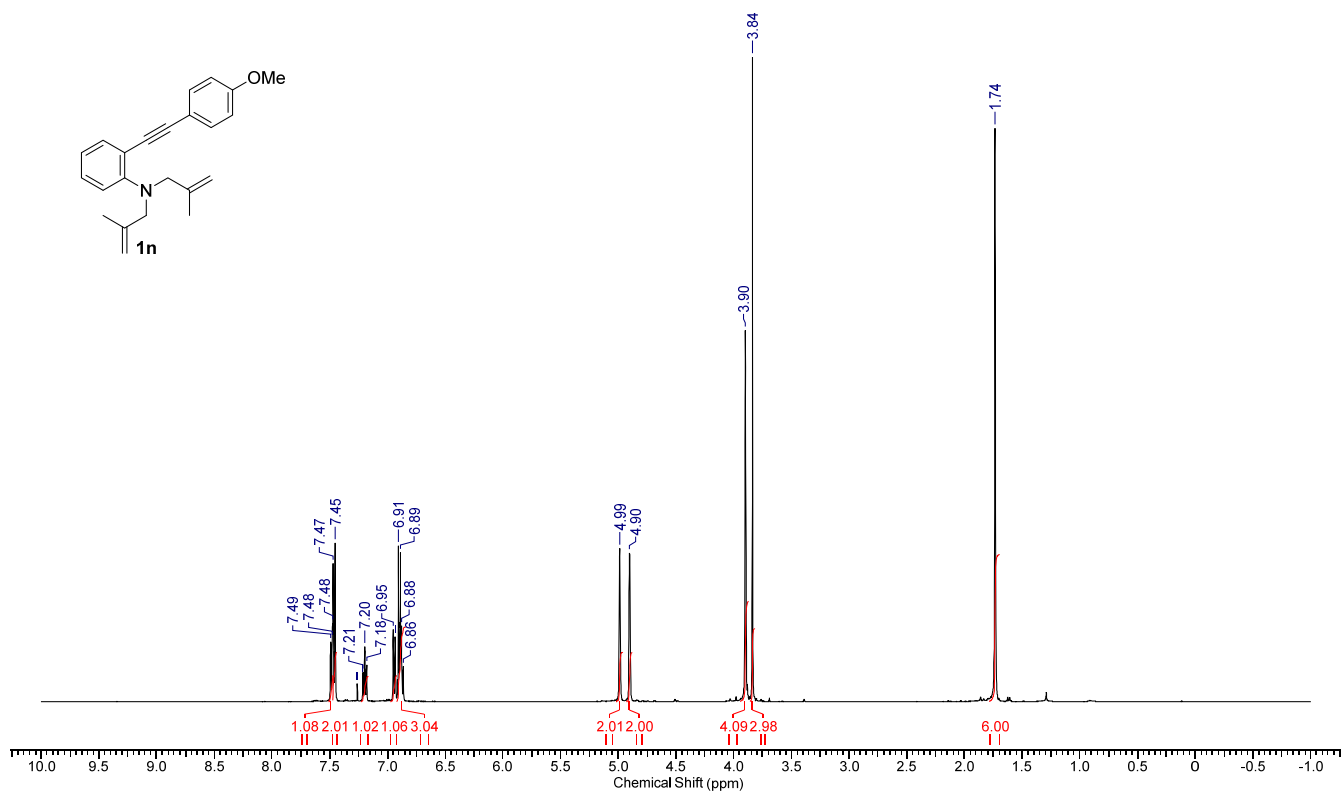

Enlarged view

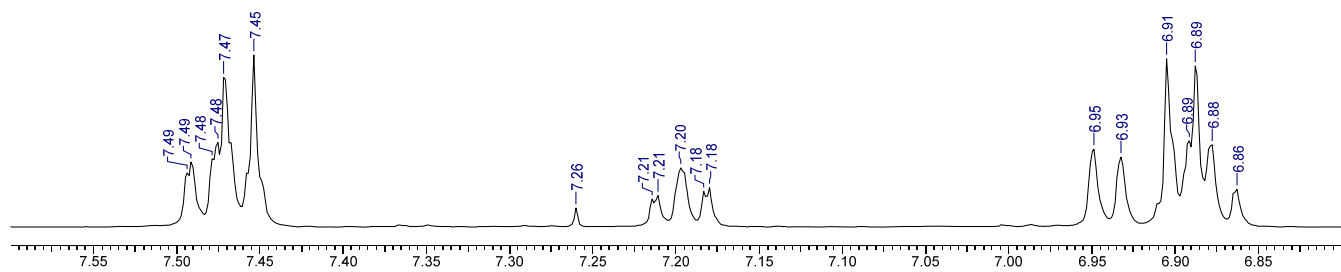

$^{13}\text{C}$  NMR (125 MHz,  $\text{CDCl}_3$ ) of **1n**

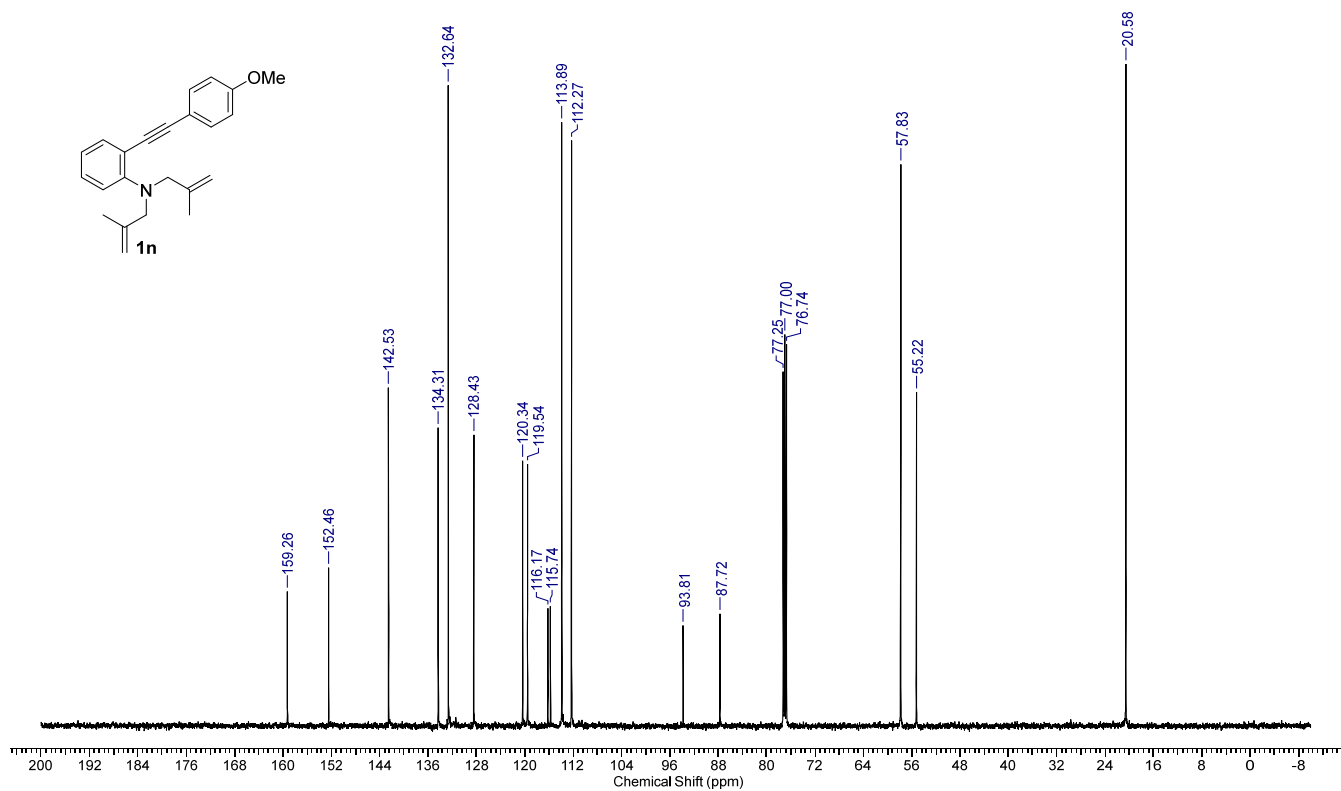

Enlarged view

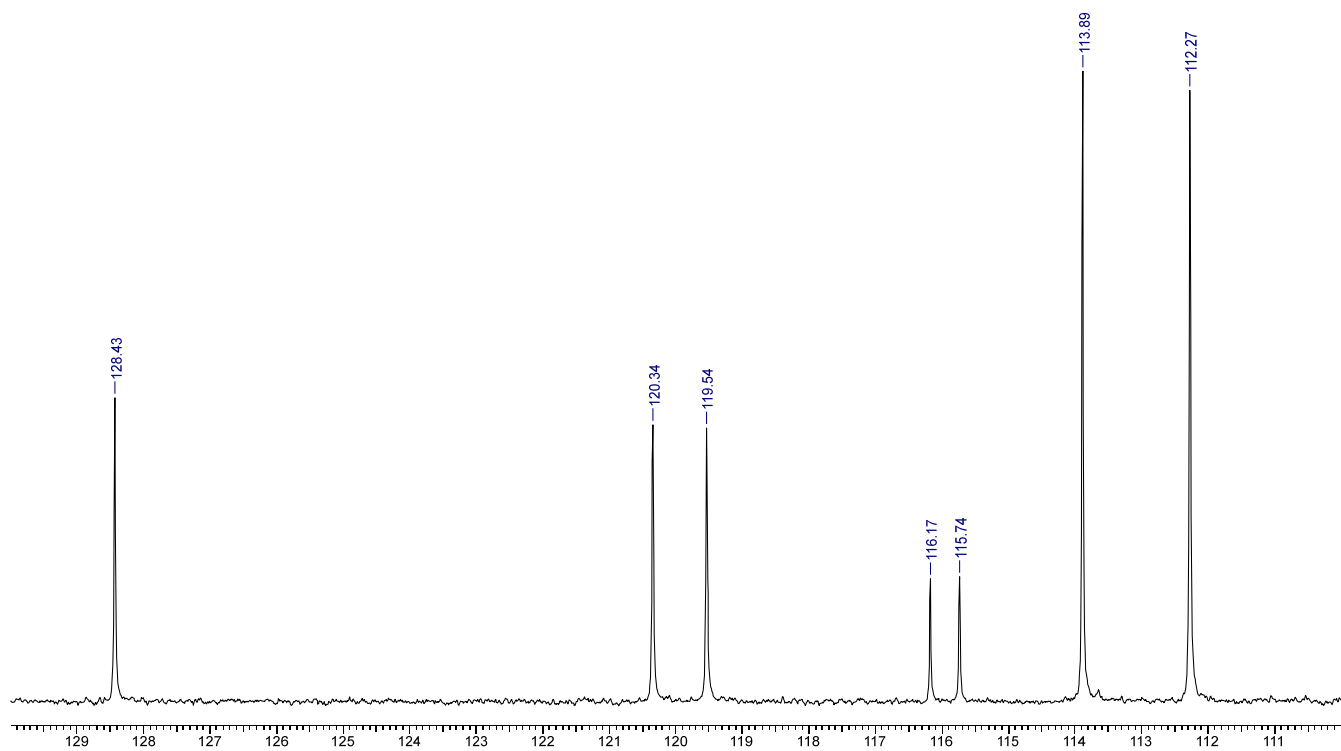

<sup>1</sup>H NMR (500 MHz, CDCl<sub>3</sub>) of **1o**

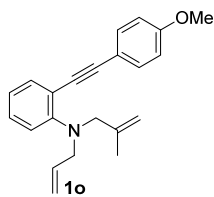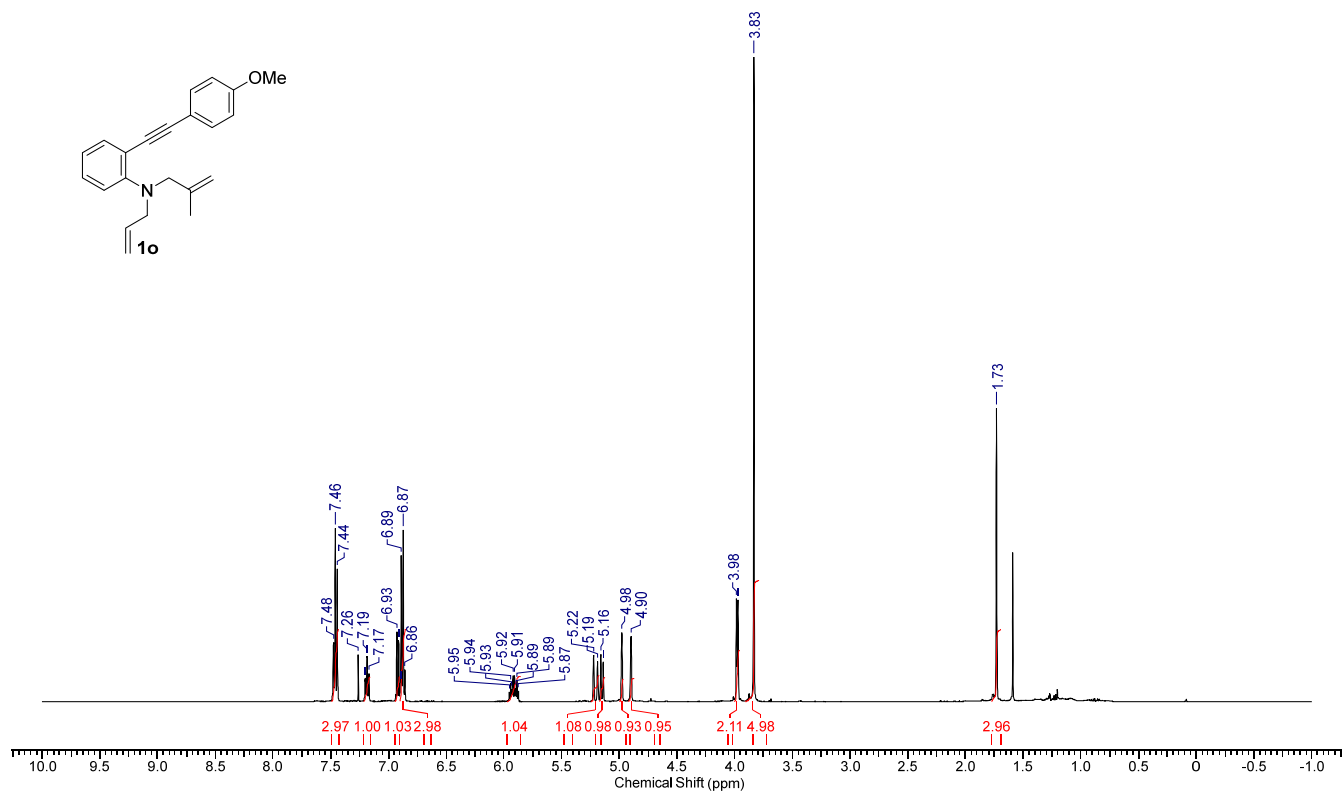

Enlarged view

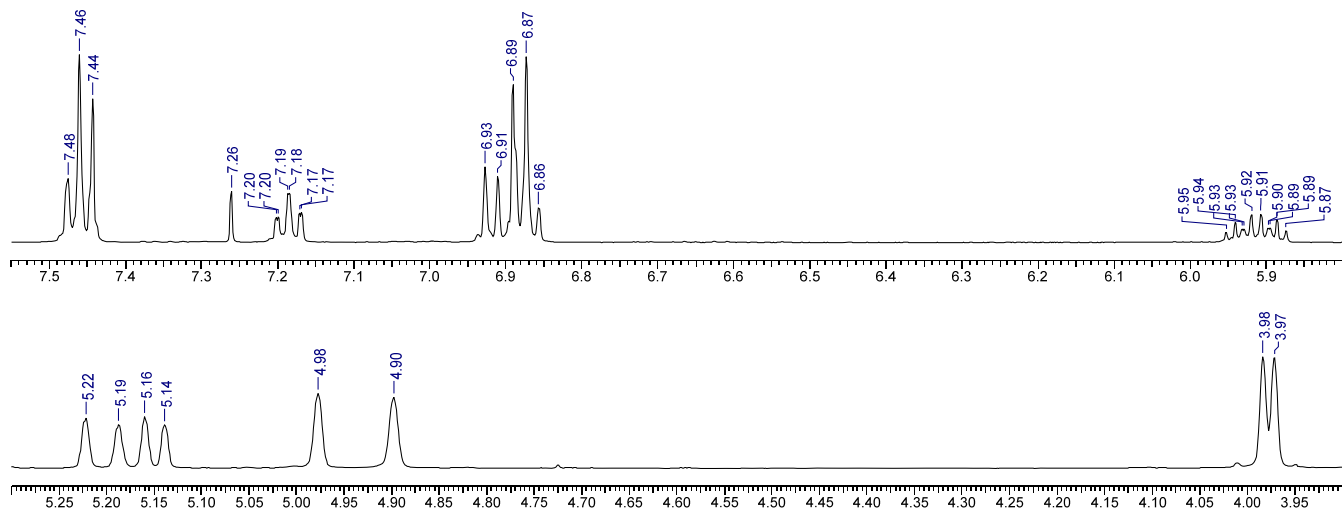

$^{13}\text{C}$  NMR (125 MHz,  $\text{CDCl}_3$ ) of **1o**

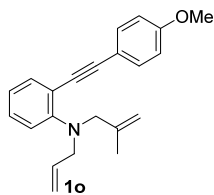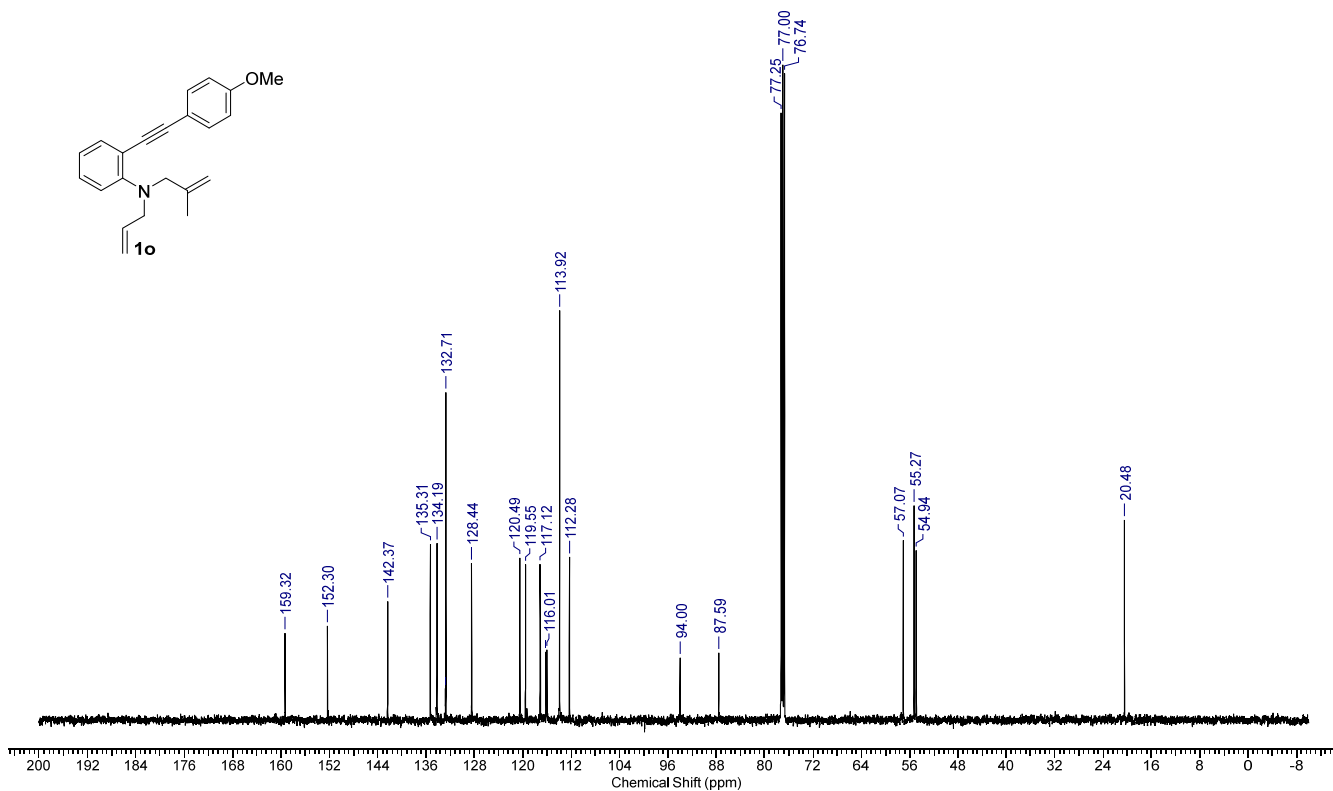

Enlarged view

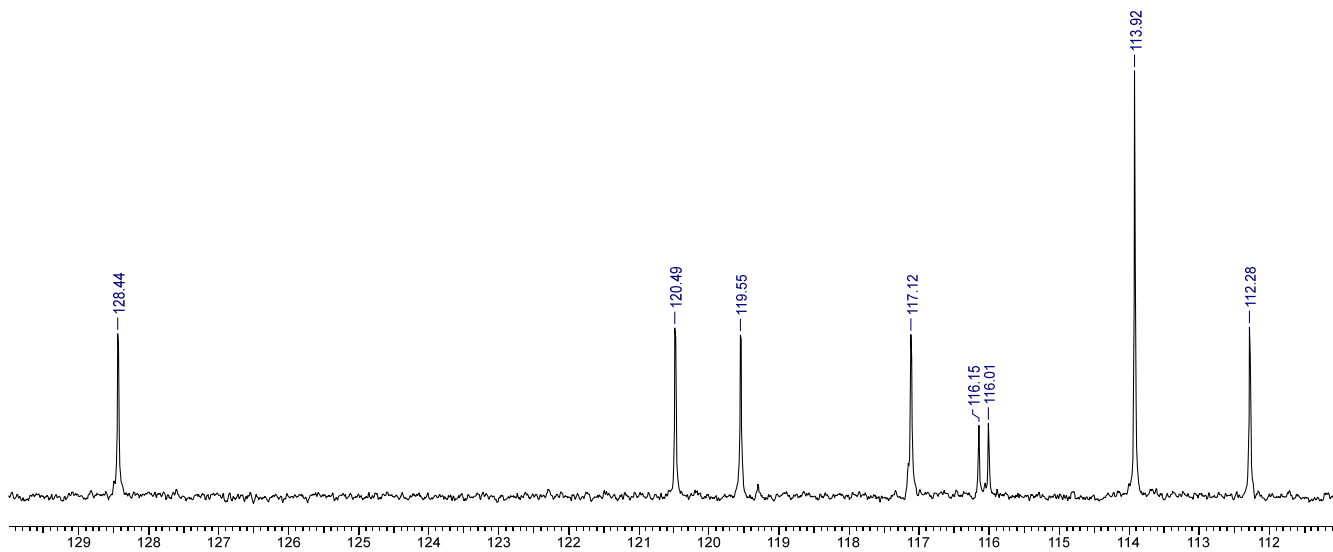

$^1\text{H}$  NMR (500 MHz,  $\text{CDCl}_3$ ) of **1p** (83:17 mixture of geometrical isomers)

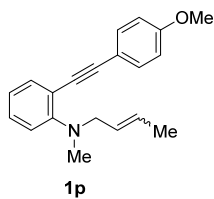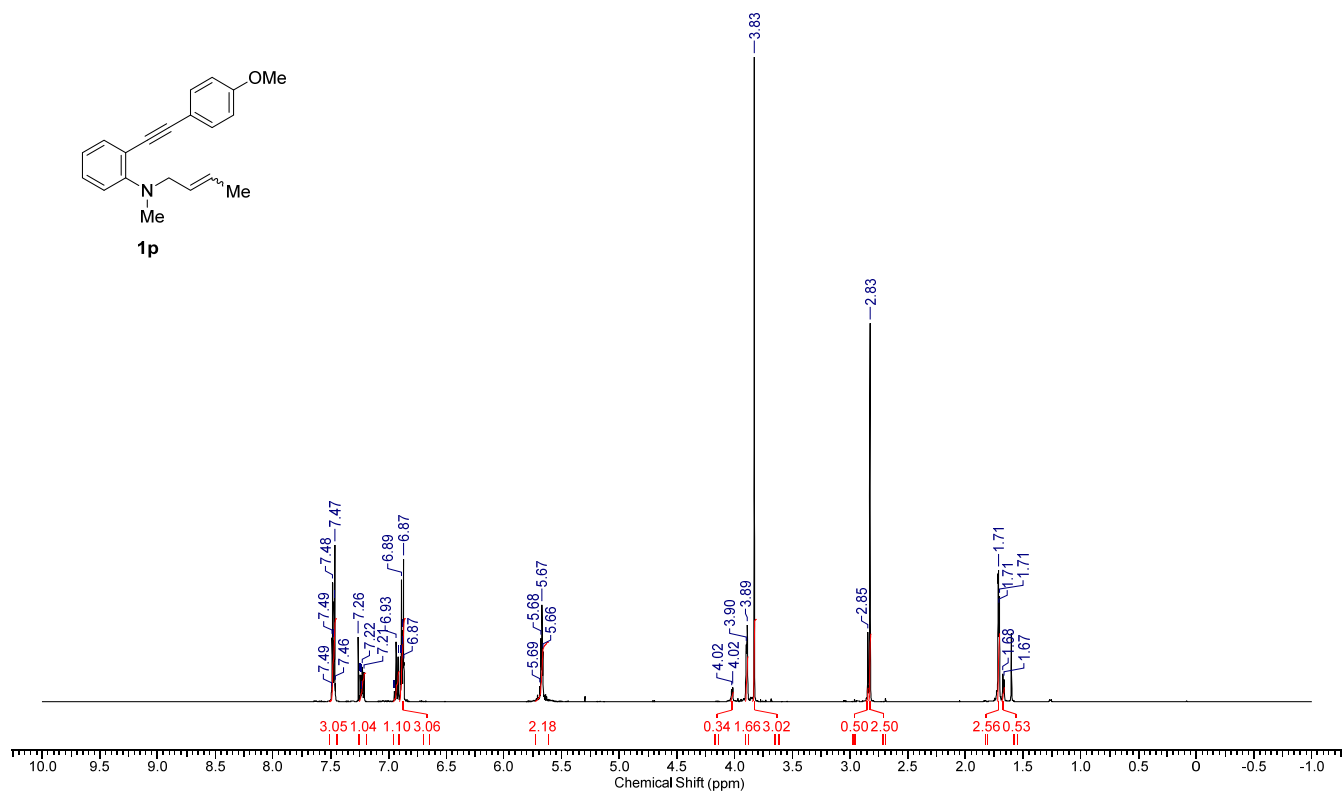

Enlarged view

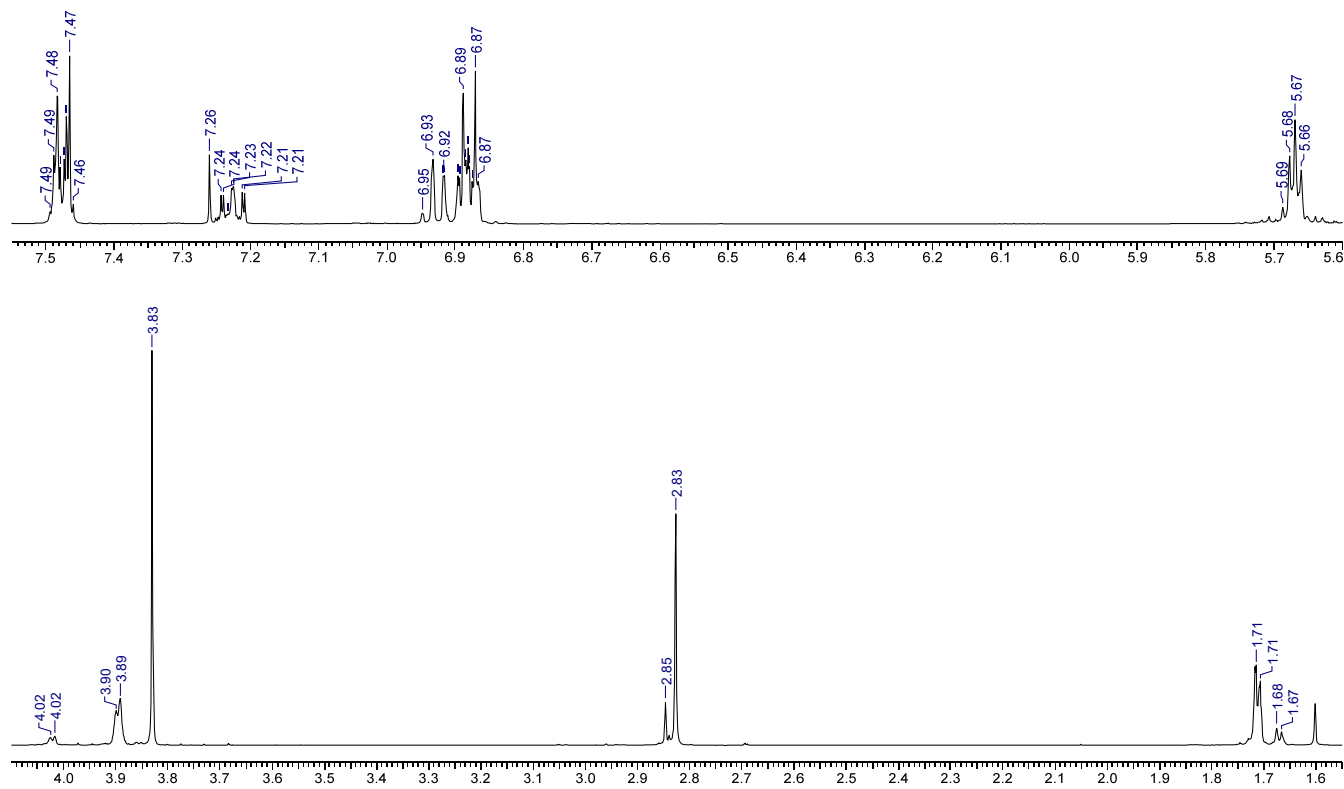

$^{13}\text{C}$  NMR (125 MHz,  $\text{CDCl}_3$ ) of **1p** (83:17 mixture of geometrical isomers)

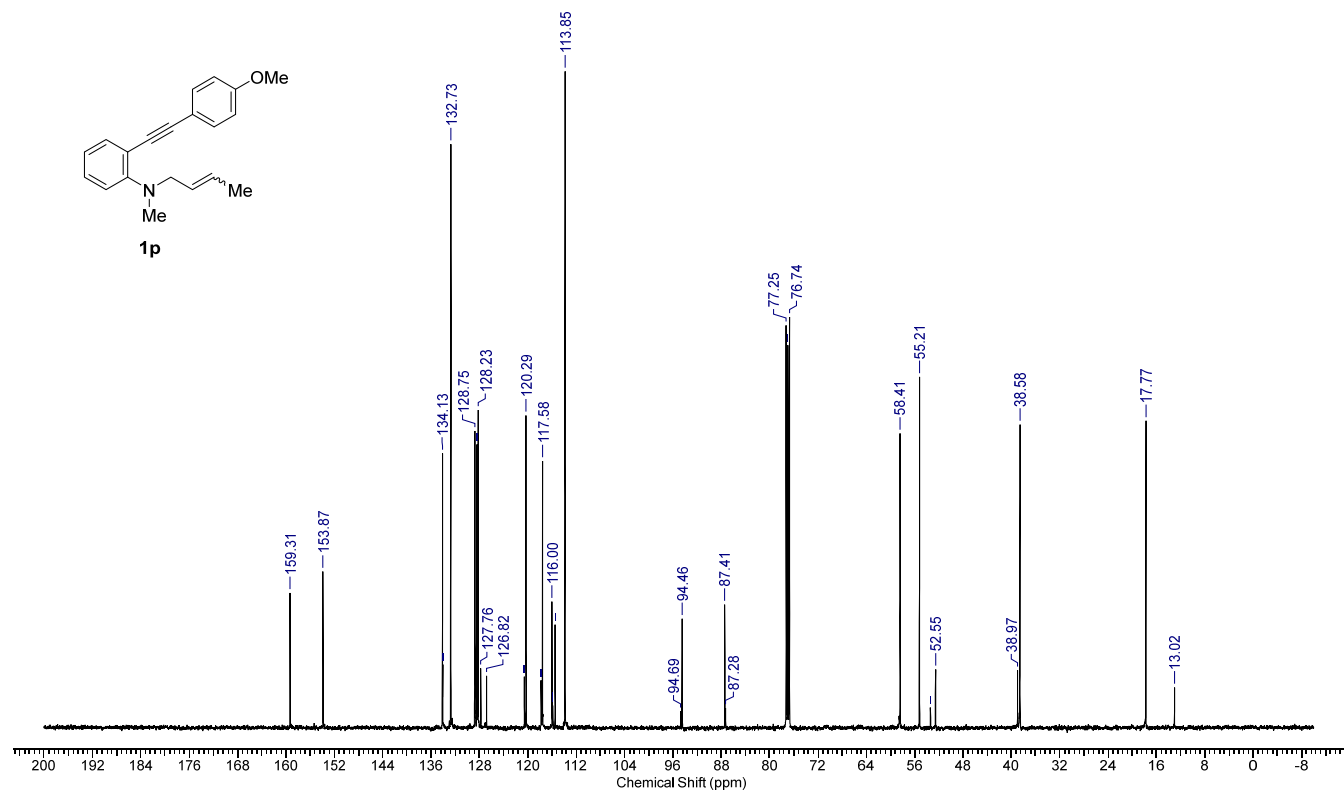

Enlarged view

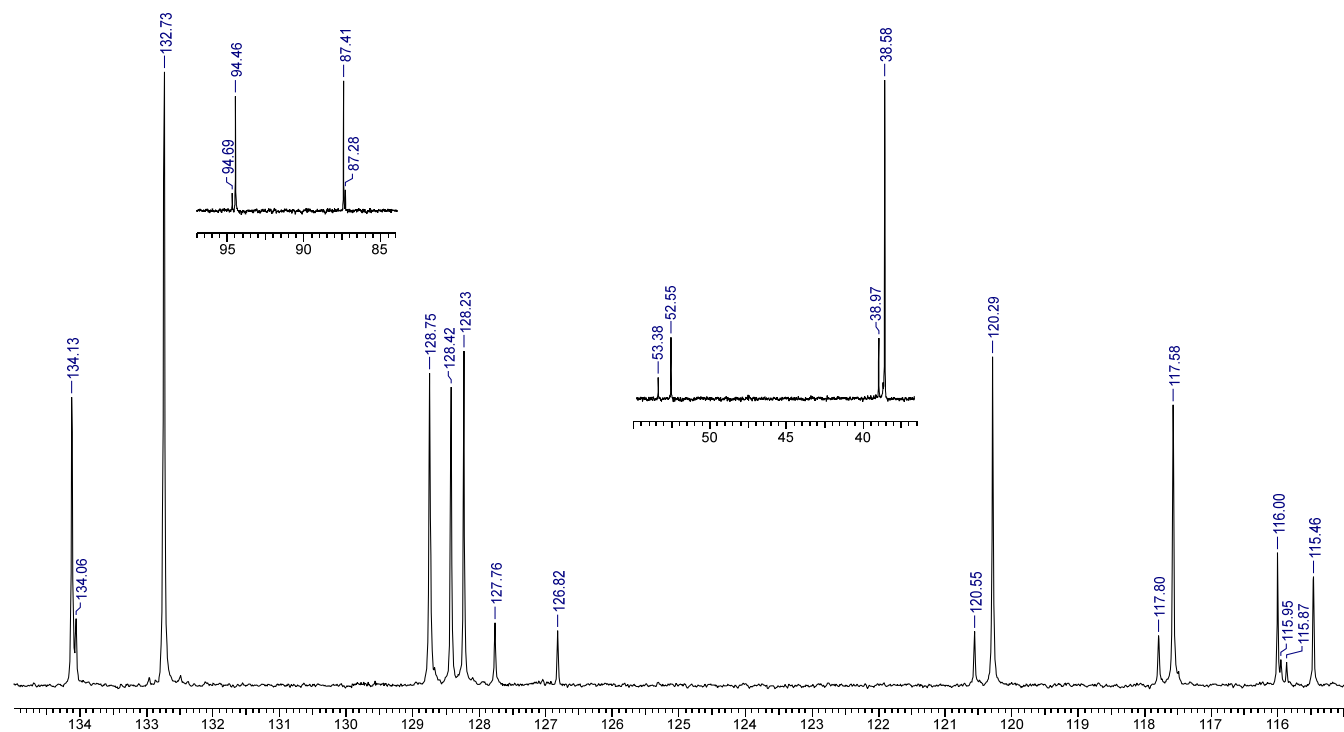



<sup>1</sup>H NMR (500 MHz, CDCl<sub>3</sub>) of **1q**

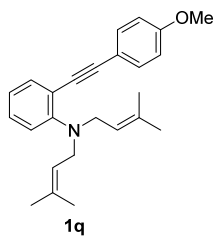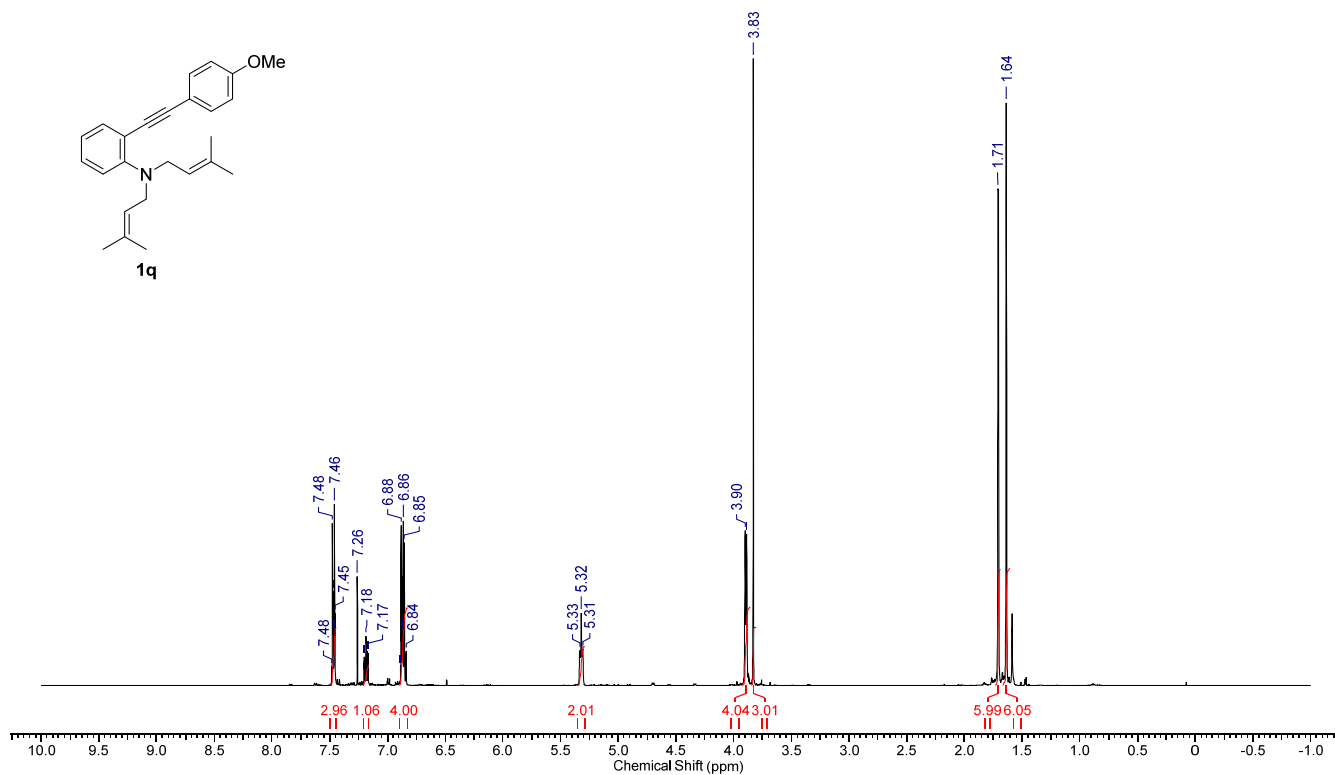

Enlarged view

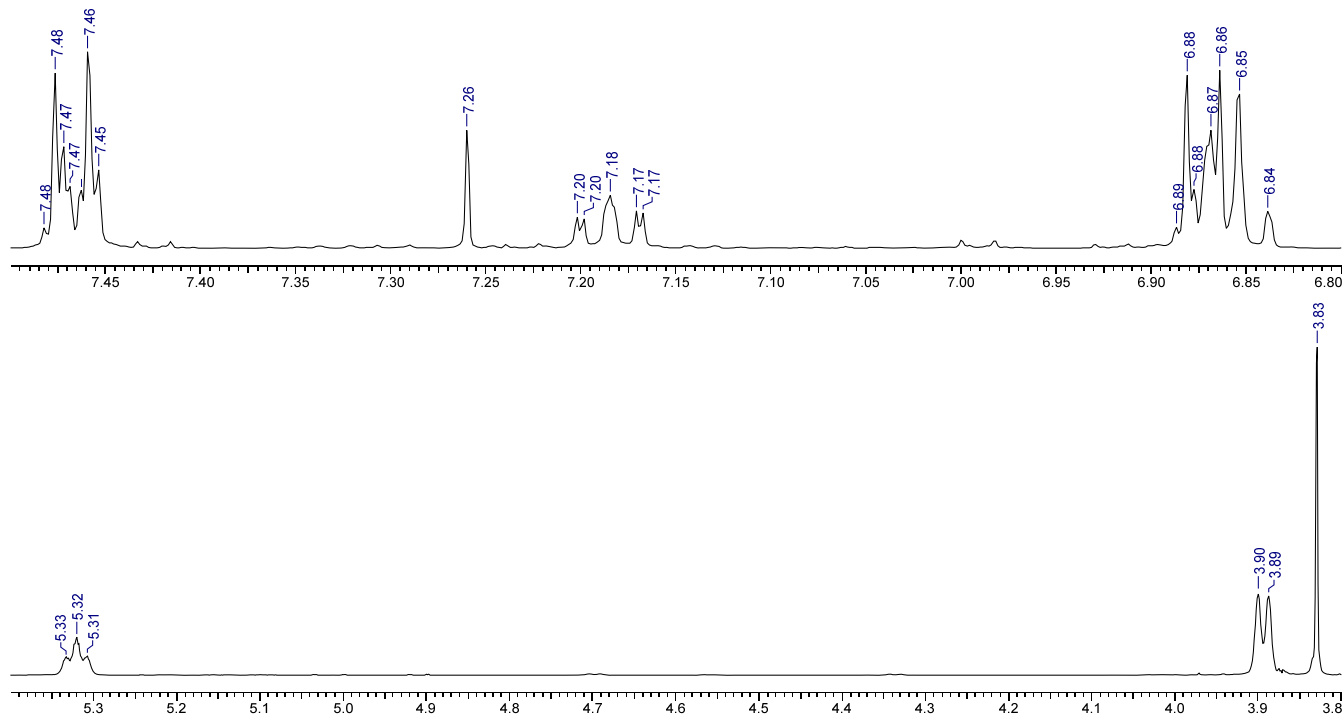

$^{13}\text{C}$  NMR (125 MHz,  $\text{CDCl}_3$ ) of **1q**

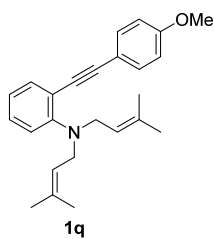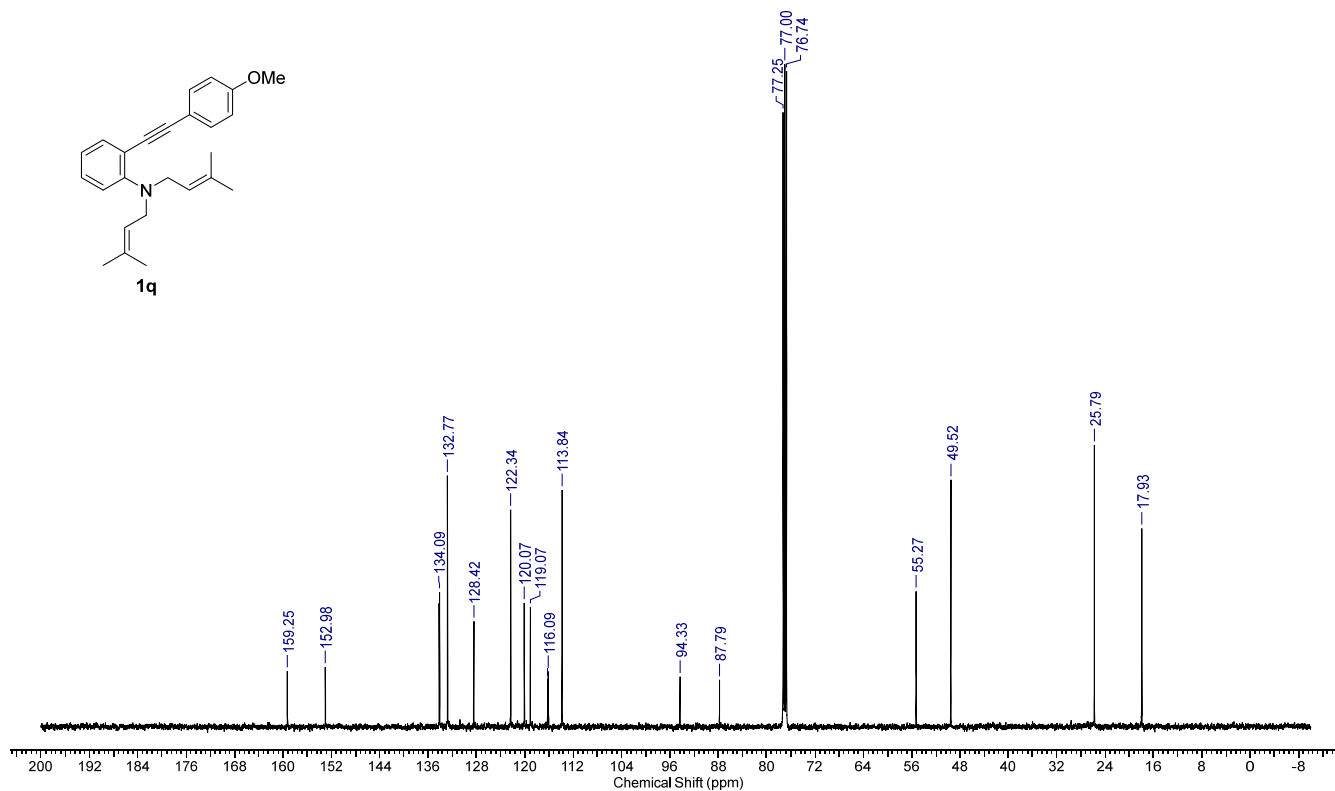

Enlarged view

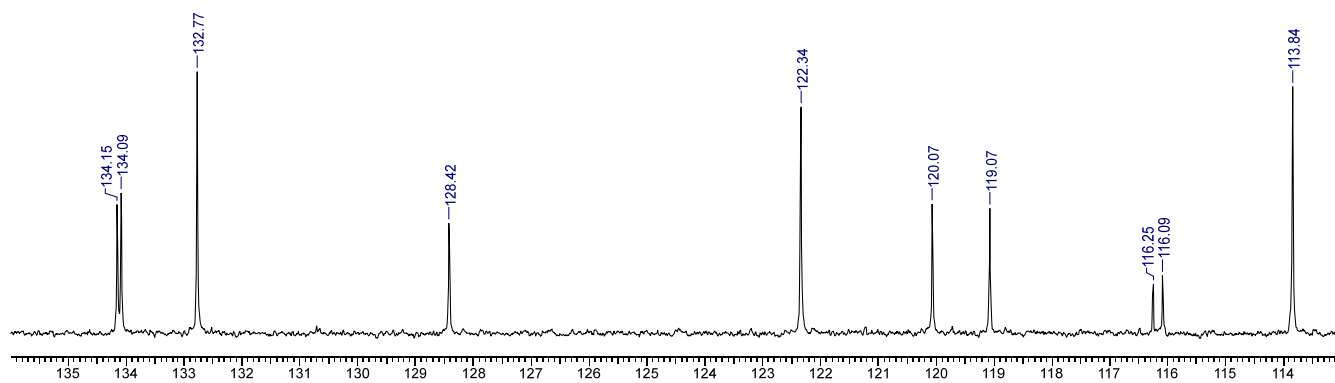

<sup>1</sup>H NMR (500 MHz, CDCl<sub>3</sub>) of **2a**

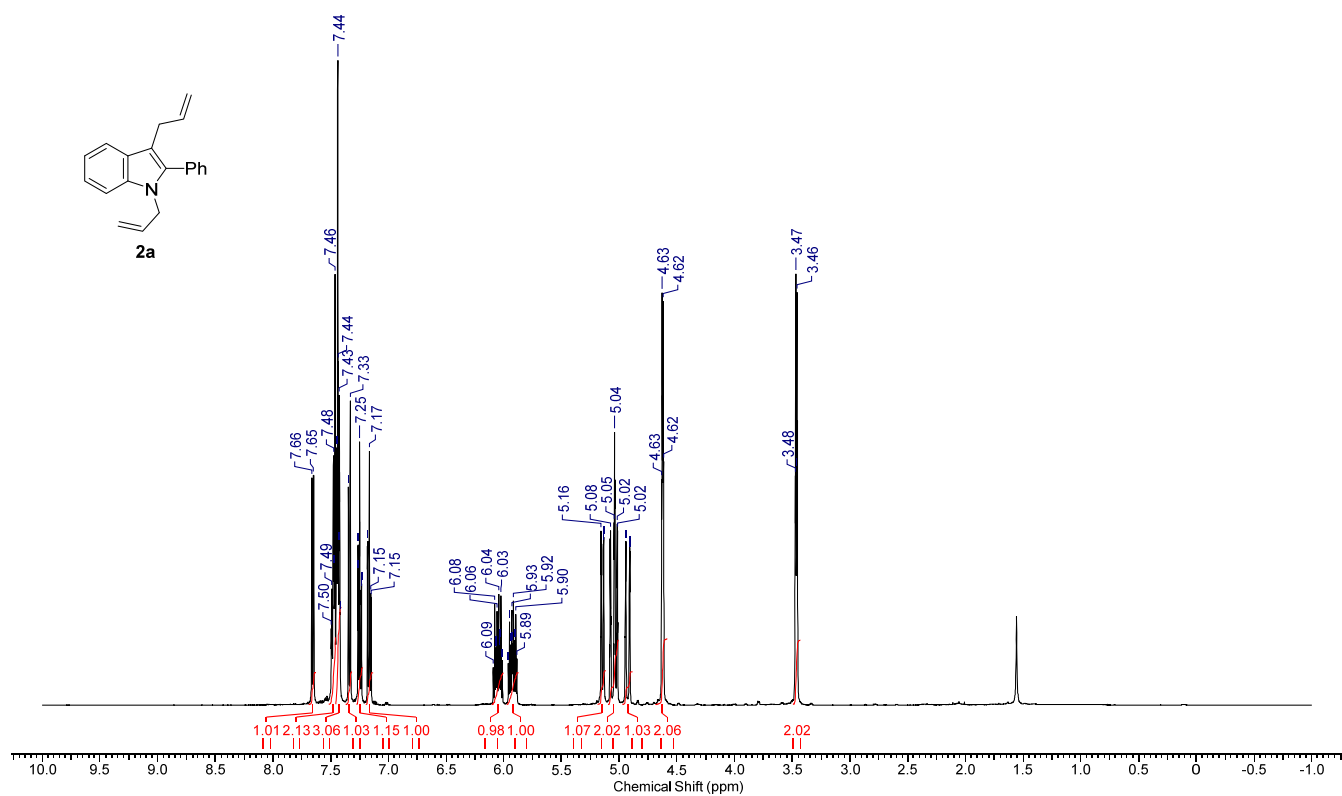

Enlarged view

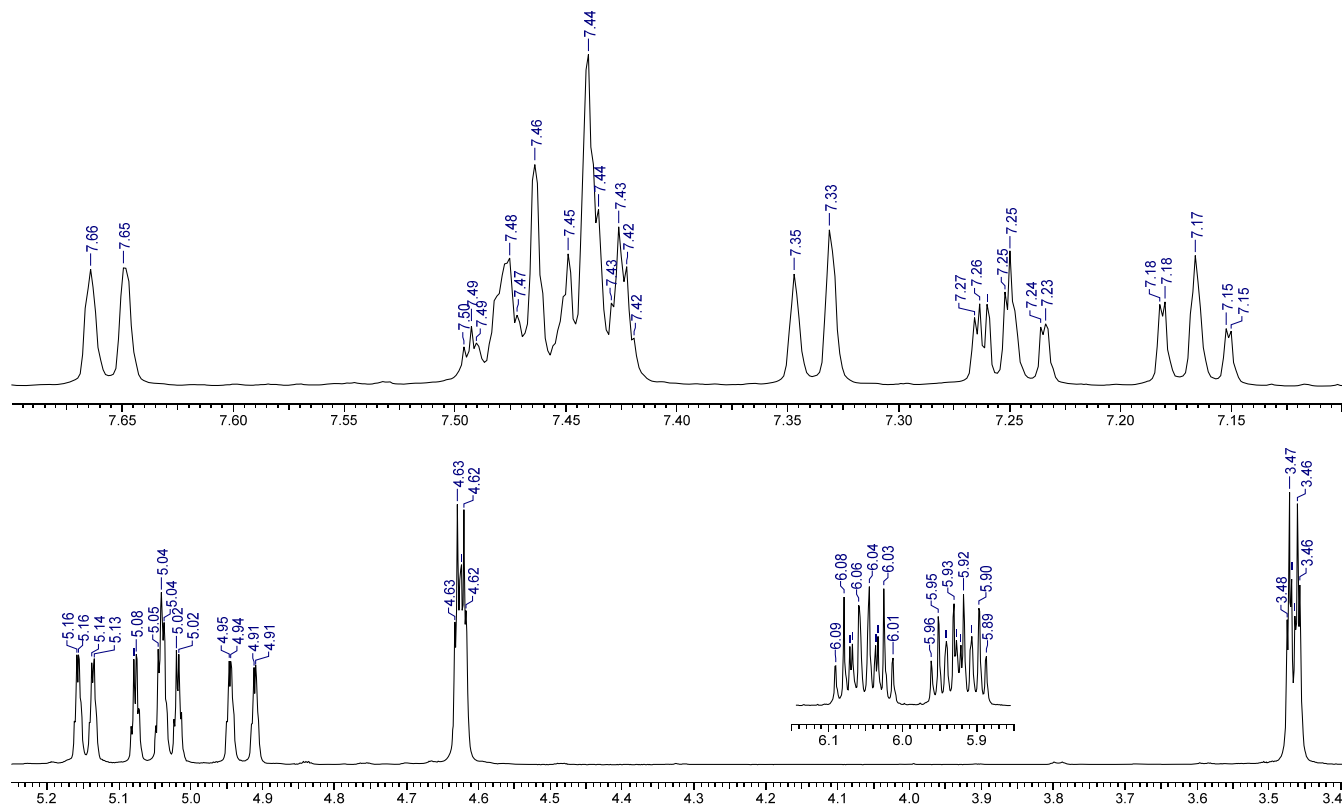

$^{13}\text{C}$  NMR (125 MHz,  $\text{CDCl}_3$ ) of **2a**

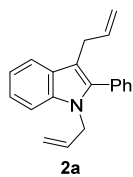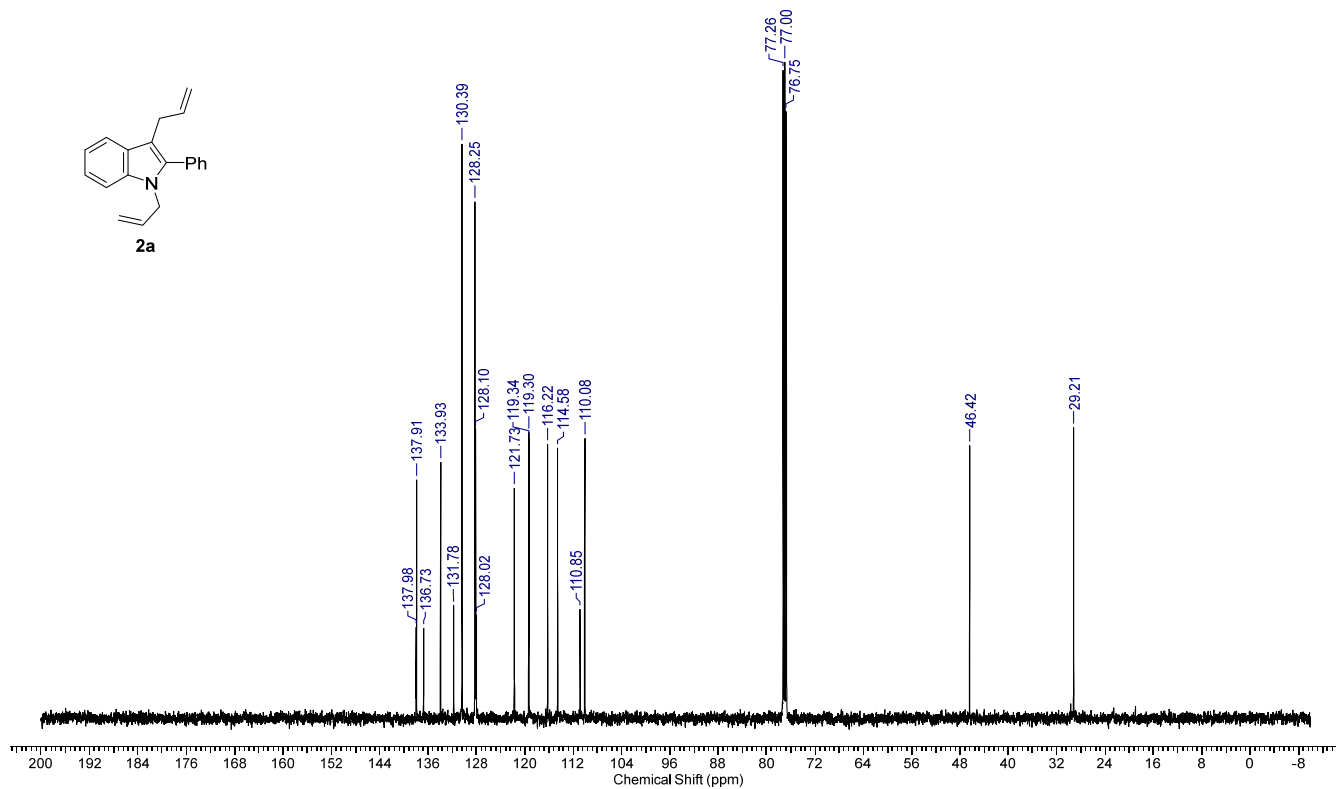

Enlarged view

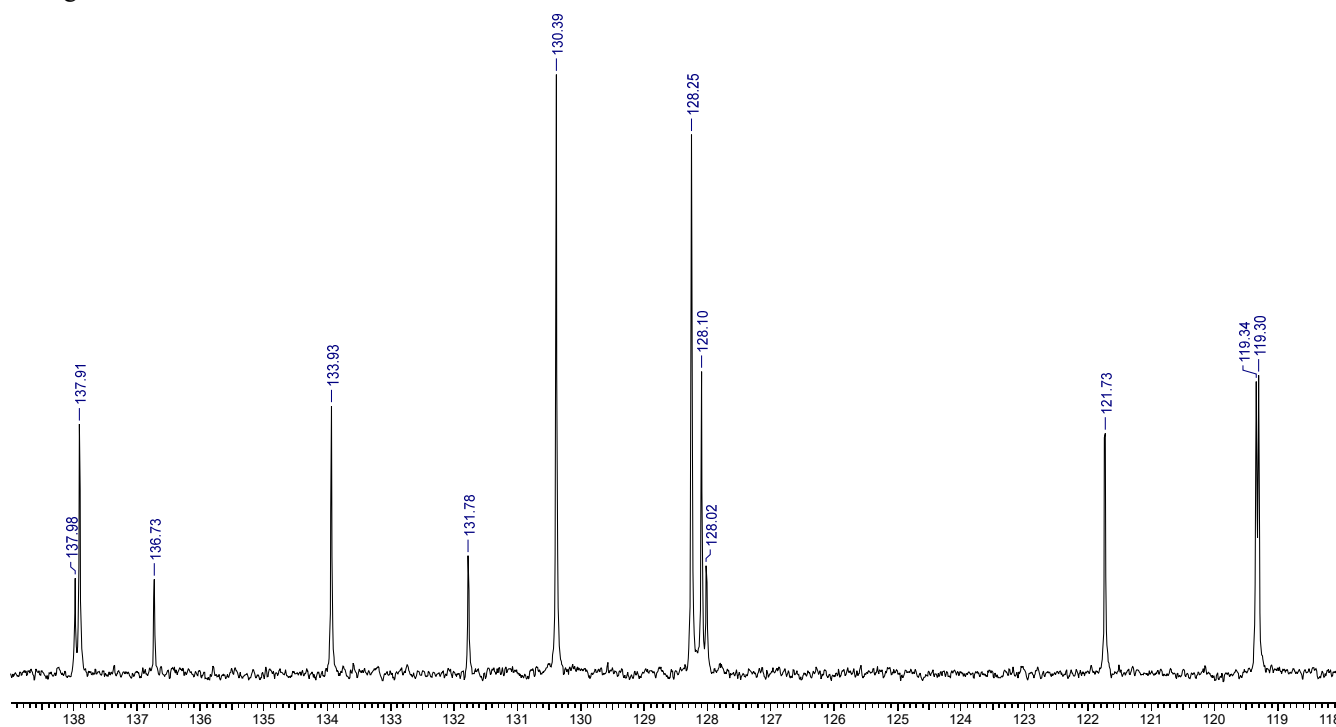

<sup>1</sup>H NMR (500 MHz, CDCl<sub>3</sub>) of **2b**

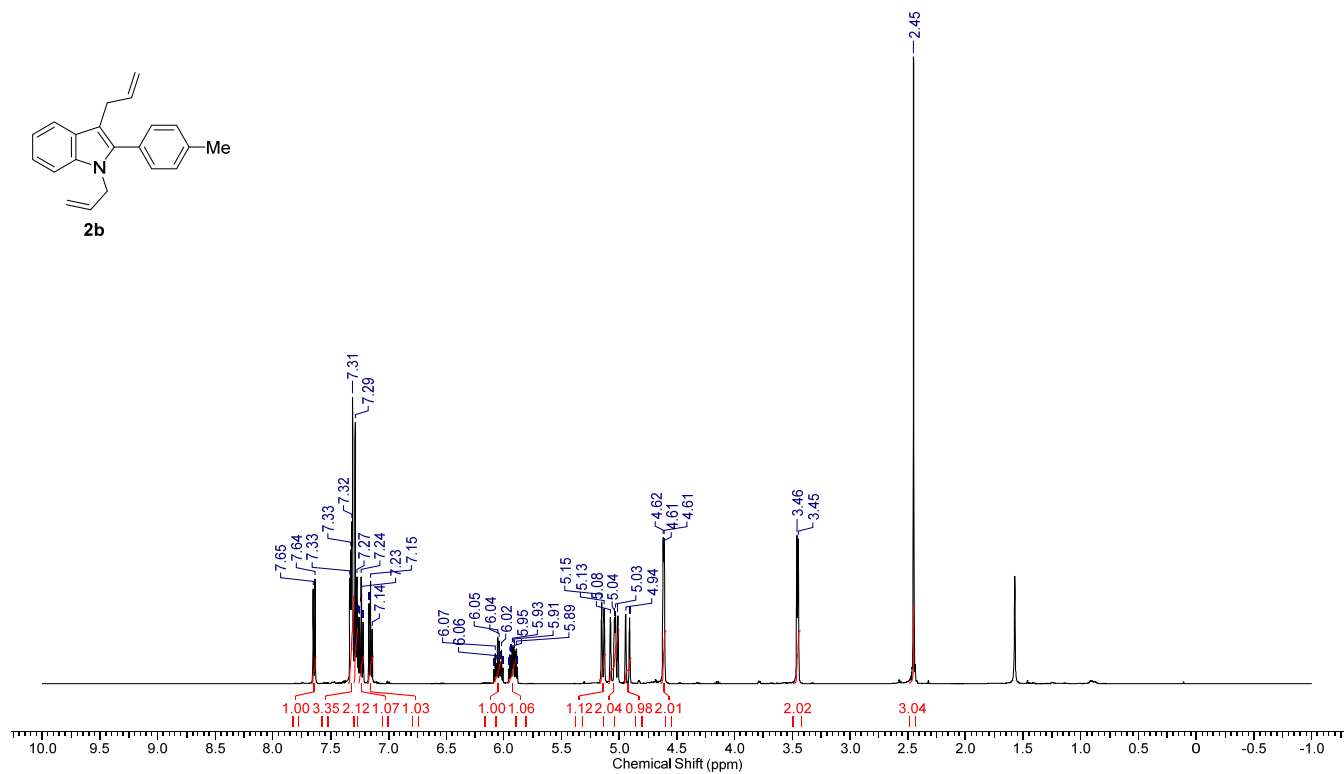

Enlarged view

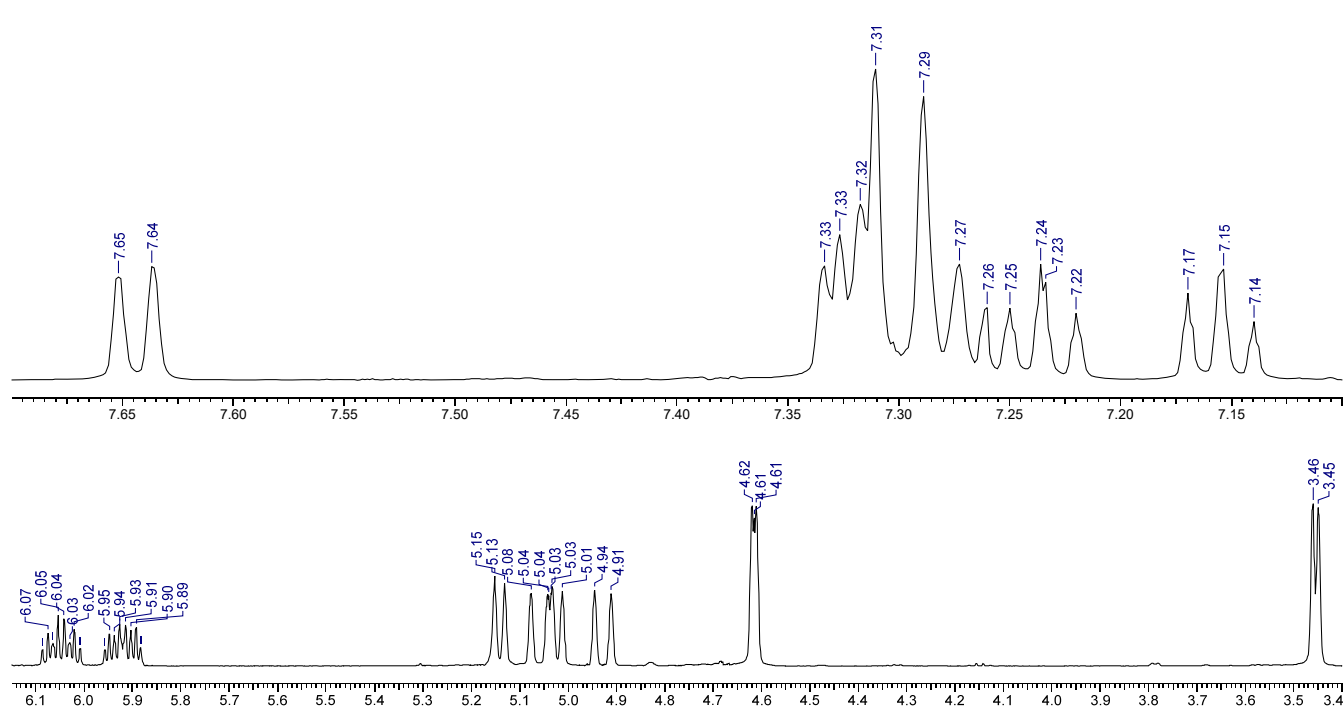

$^{13}\text{C}$  NMR (125 MHz,  $\text{CDCl}_3$ ) of **2b**

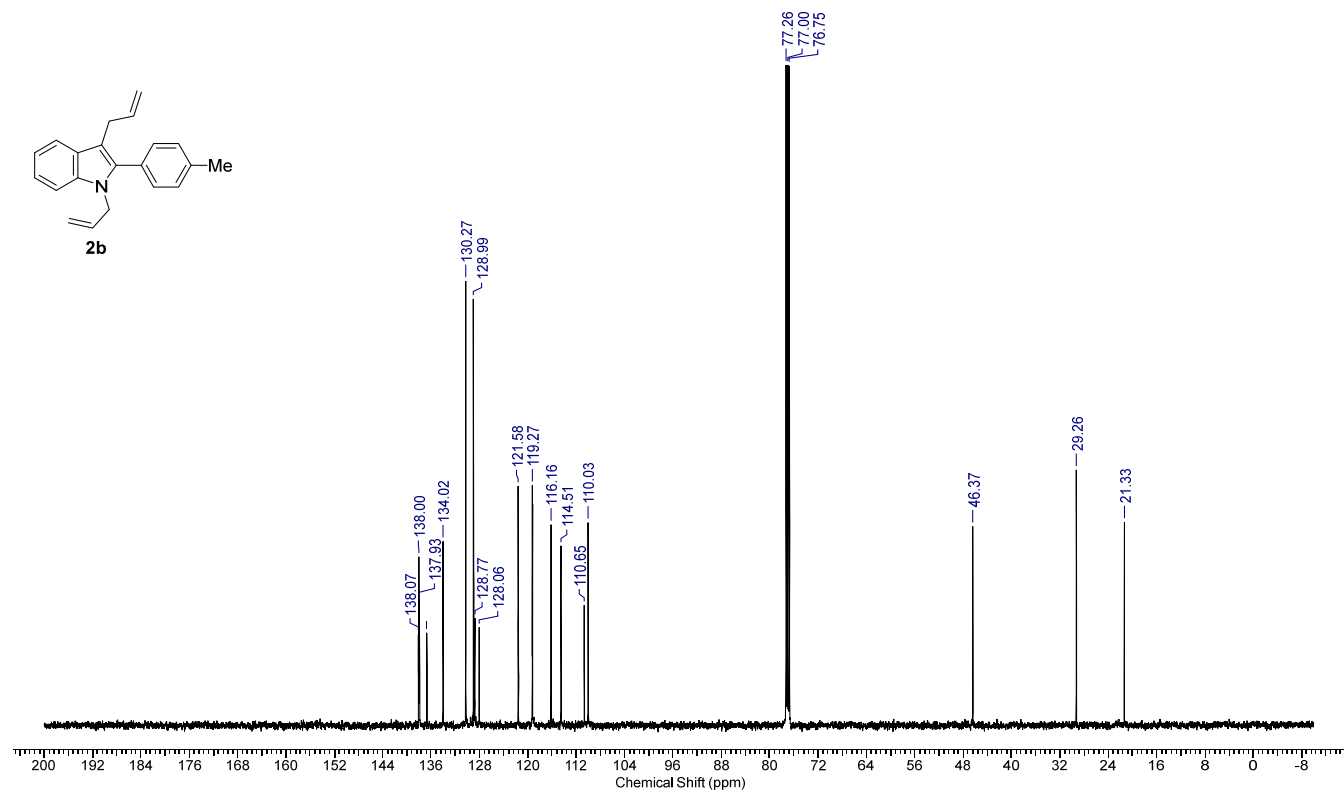

Enlarged view

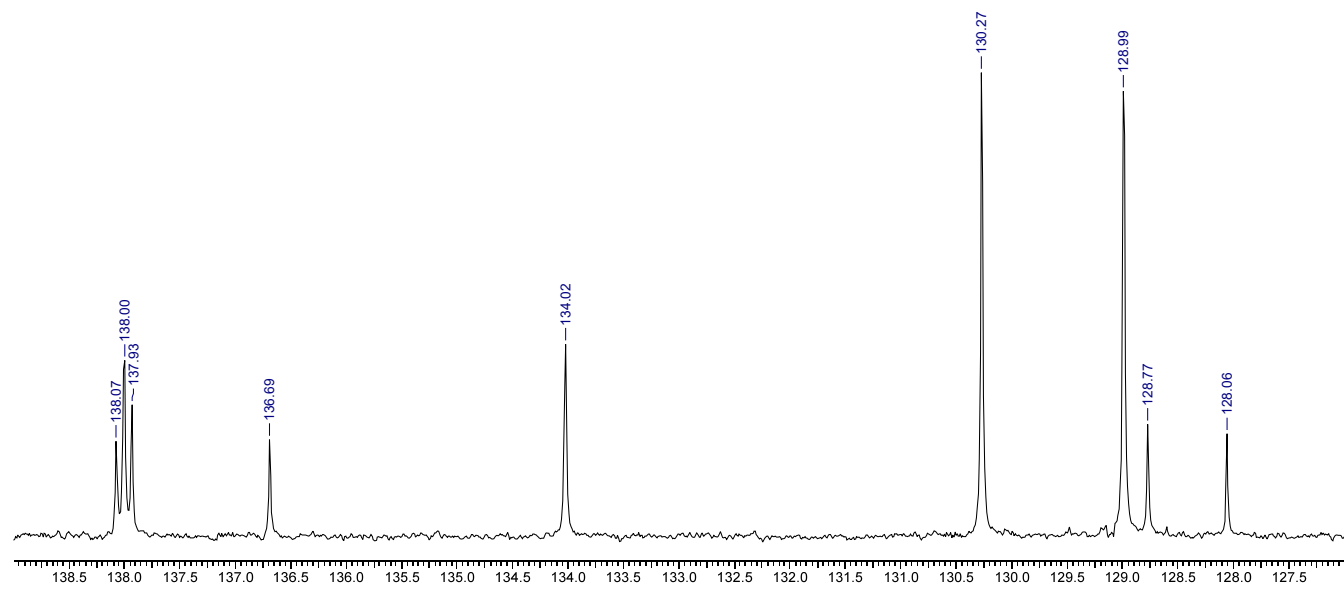

<sup>1</sup>H NMR (500 MHz, CDCl<sub>3</sub>) of **2c**

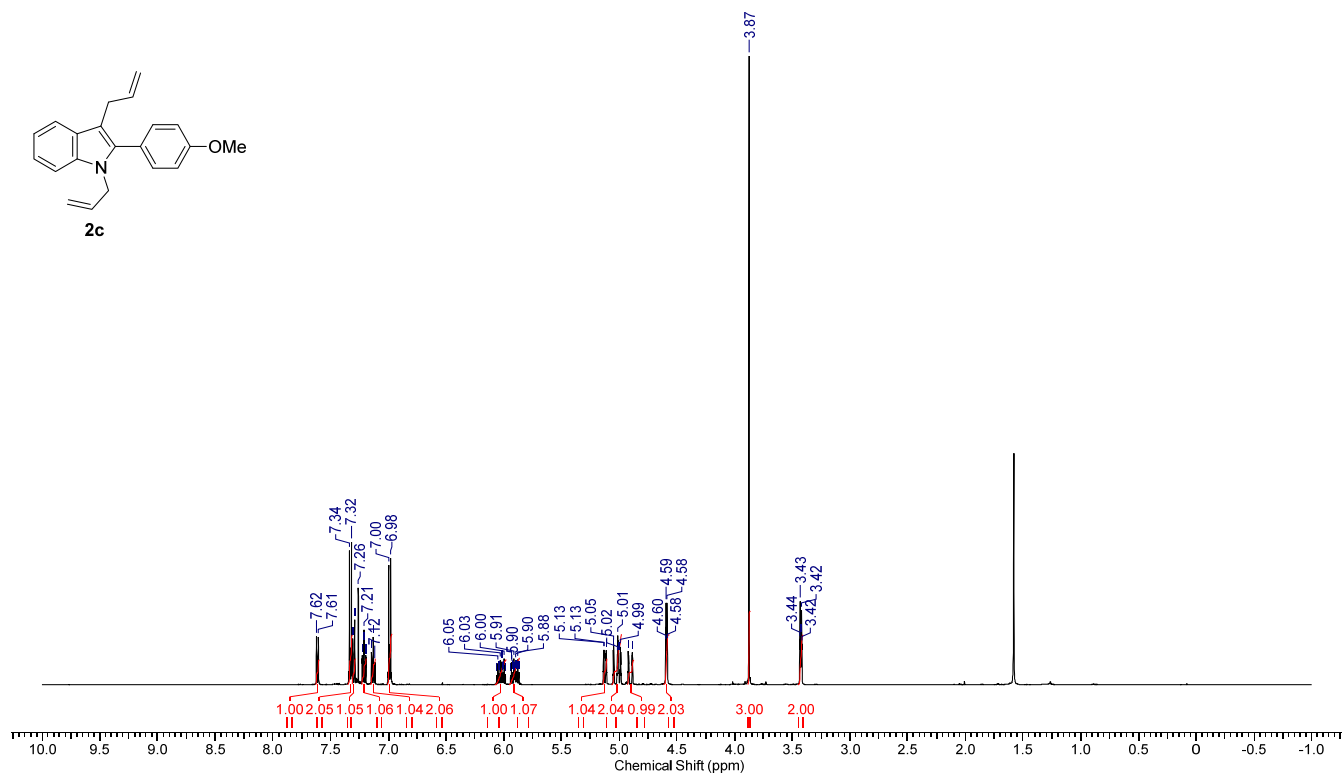

Enlarged view

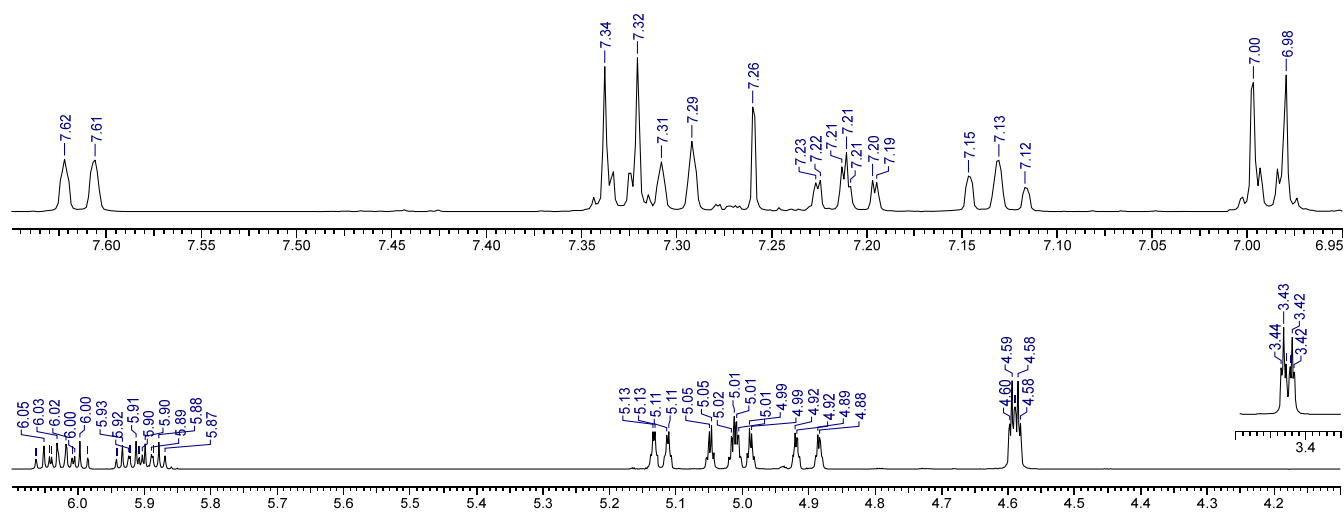

$^{13}\text{C}$  NMR (125 MHz,  $\text{CDCl}_3$ ) of **2c**

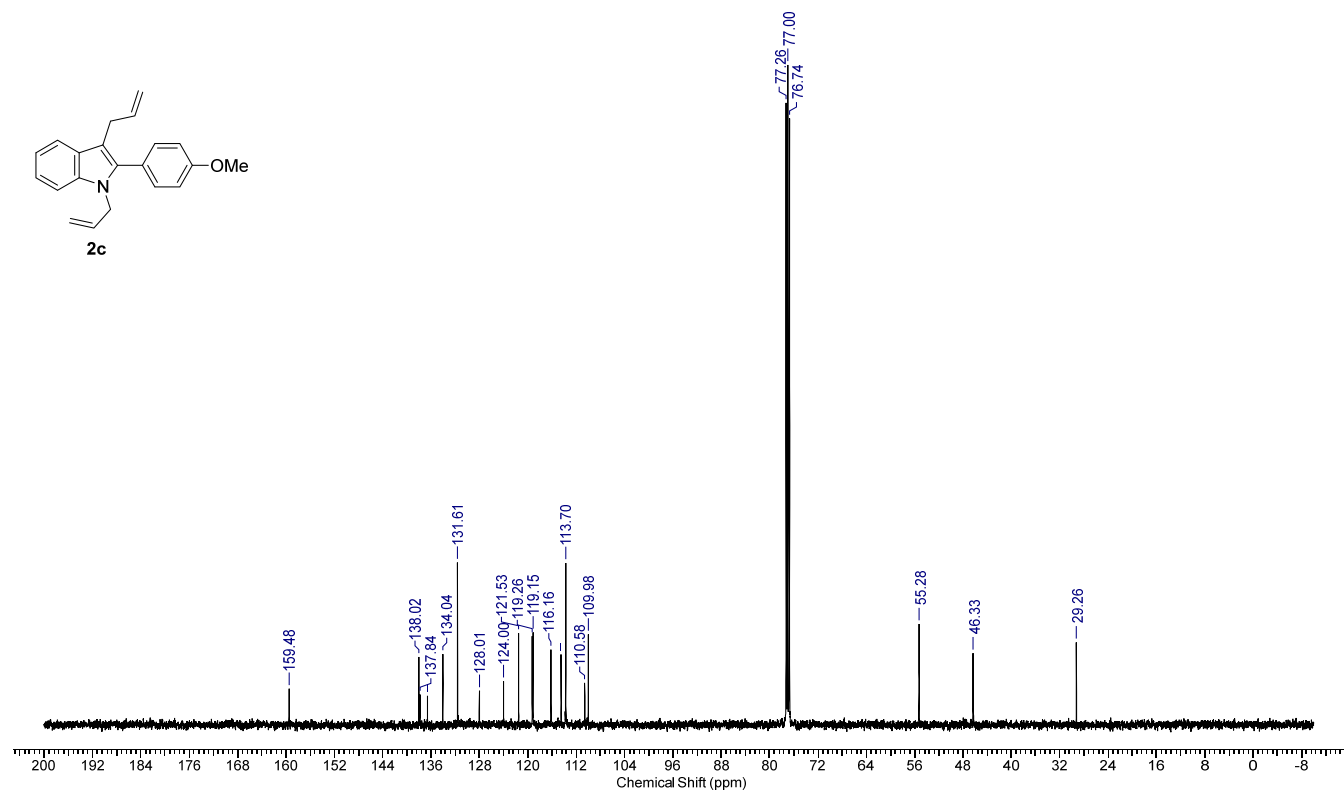

Enlarged view

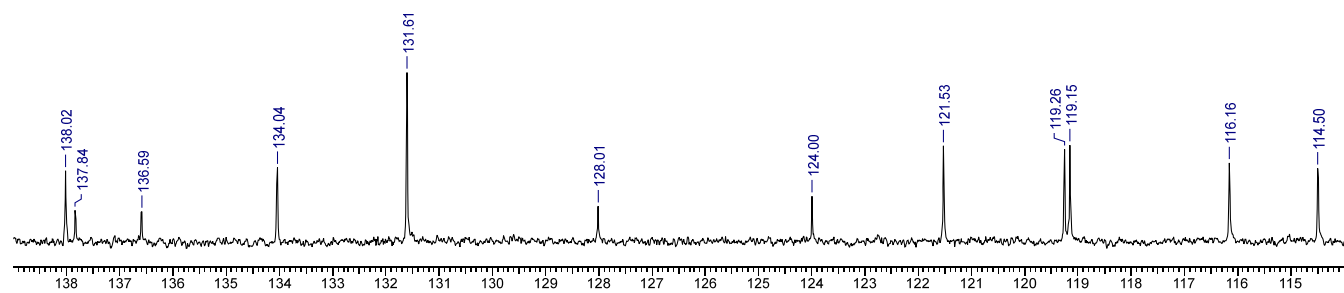



<sup>1</sup>H NMR (500 MHz, CDCl<sub>3</sub>) of **2d**

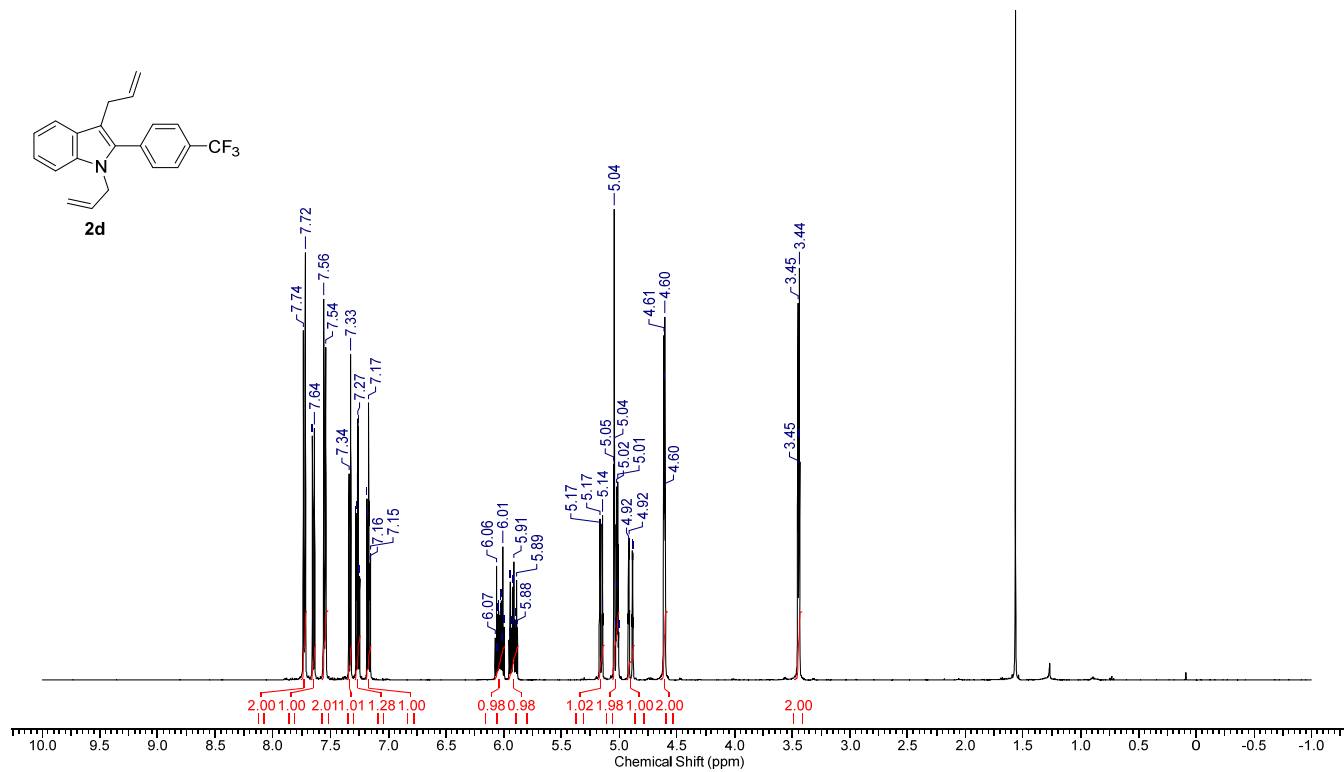

Enlarged view

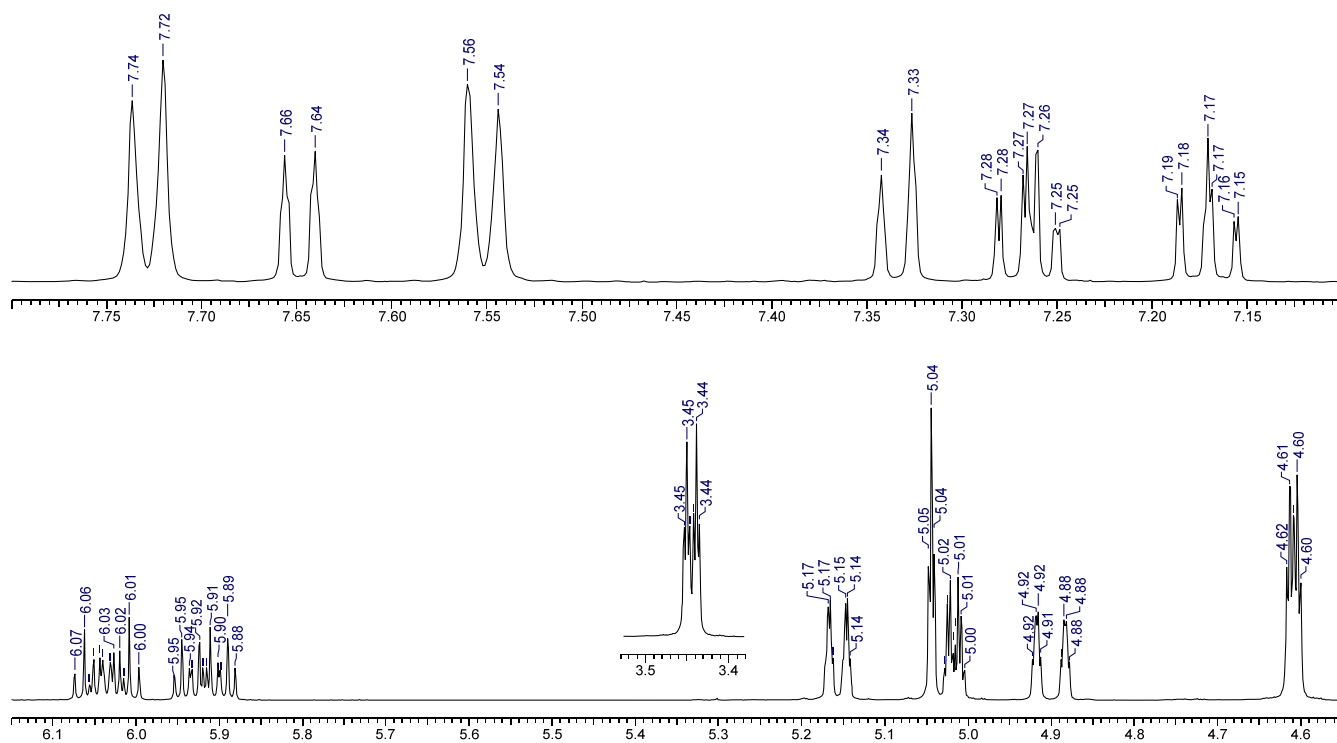

$^{13}\text{C}$  NMR (125 MHz,  $\text{CDCl}_3$ ) of **2d**

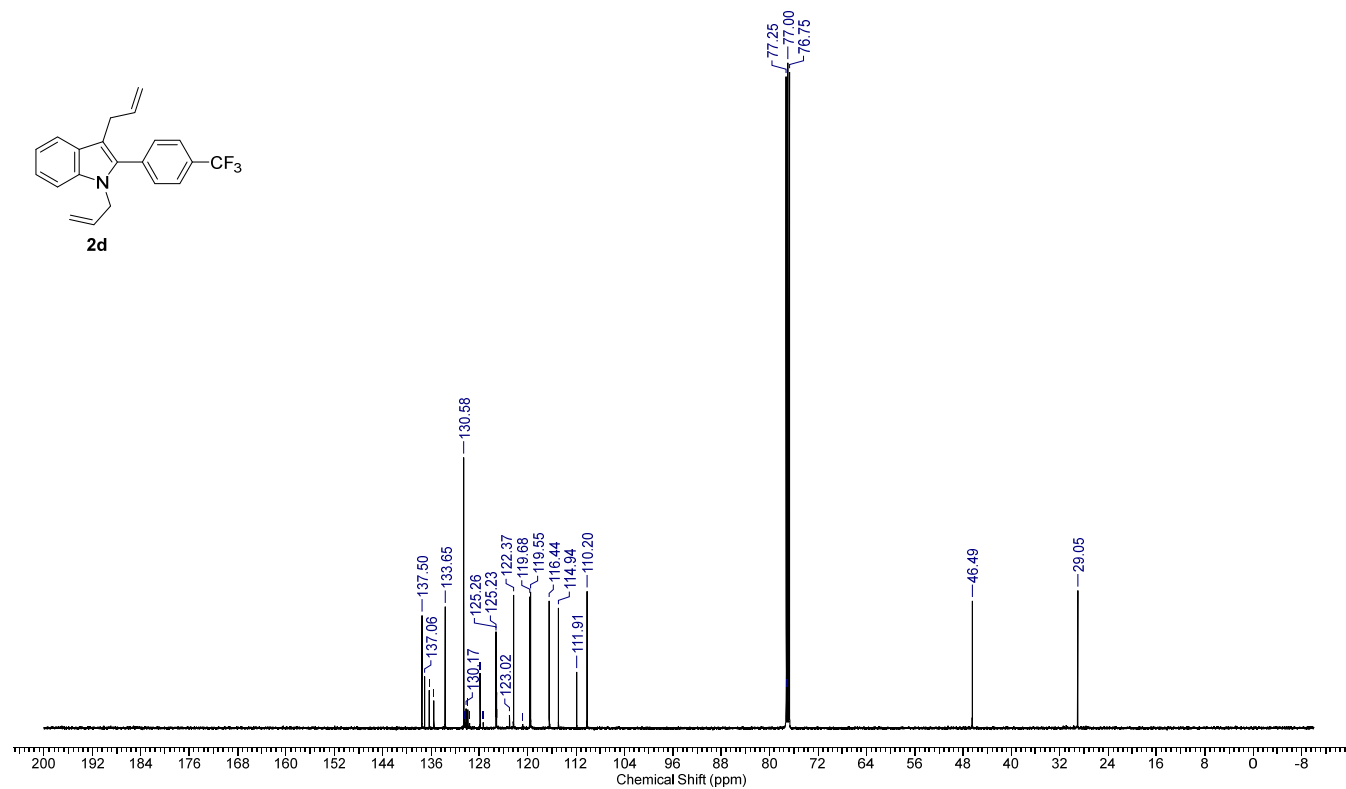

Enlarged view

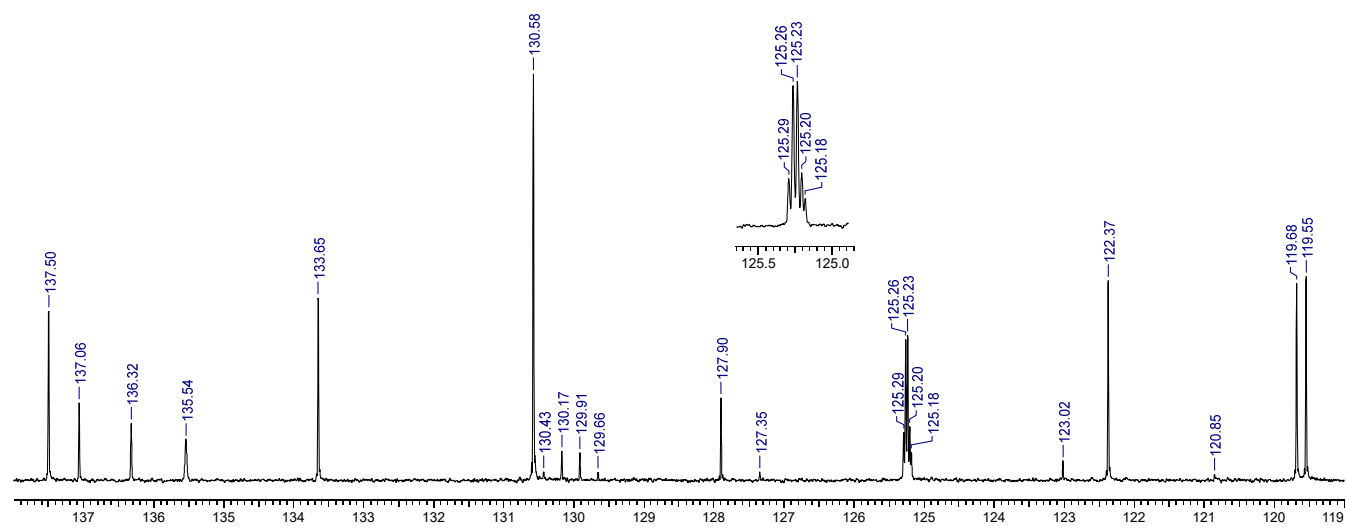

<sup>1</sup>H NMR (500 MHz, CDCl<sub>3</sub>) of **2e**

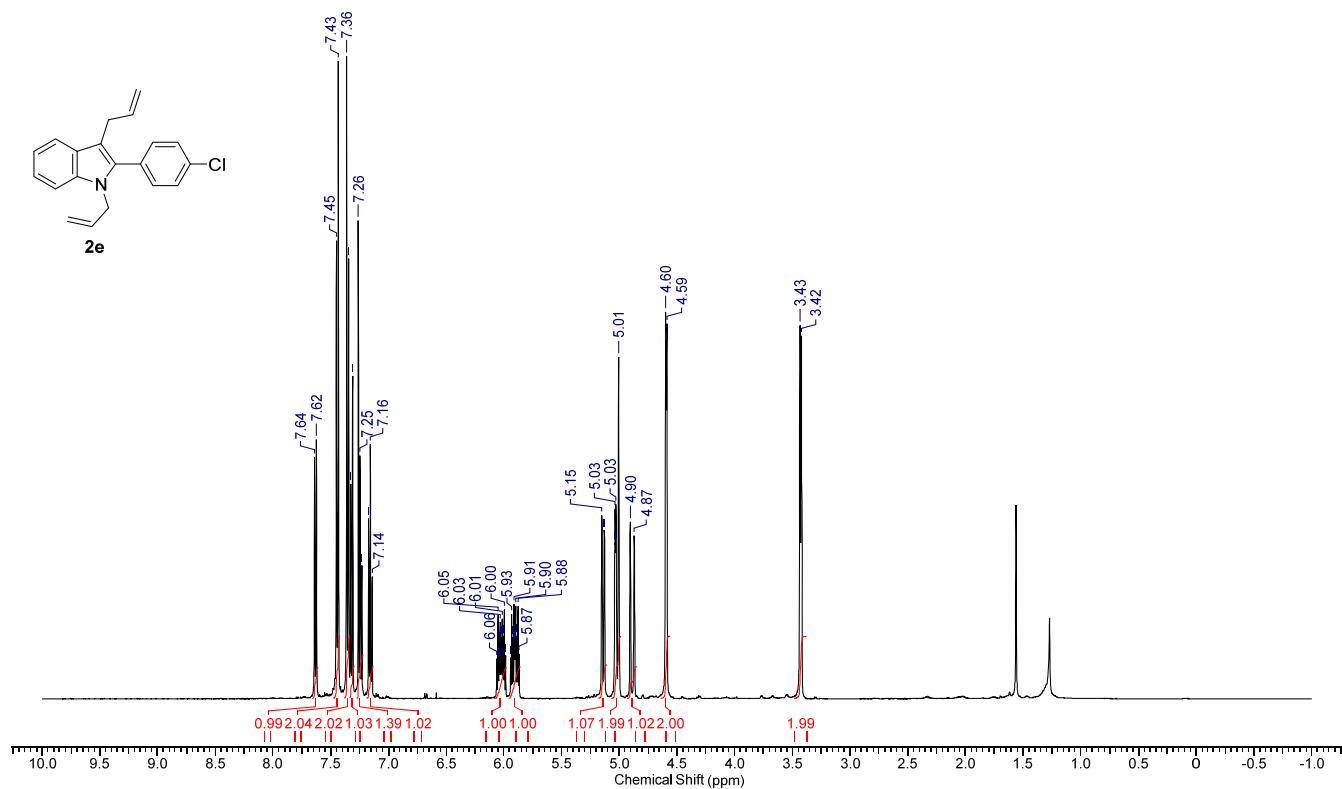

Enlarged view

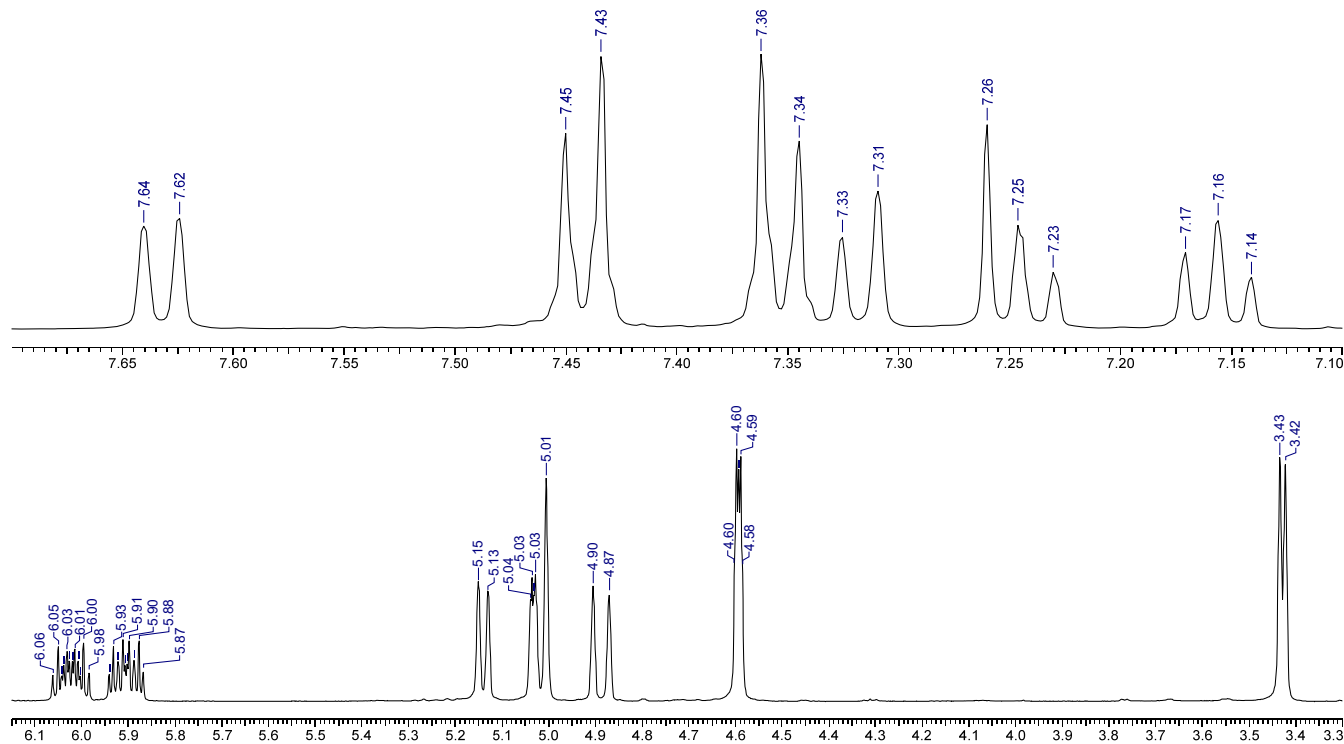

$^{13}\text{C}$  NMR (125 MHz,  $\text{CDCl}_3$ ) of **2e**

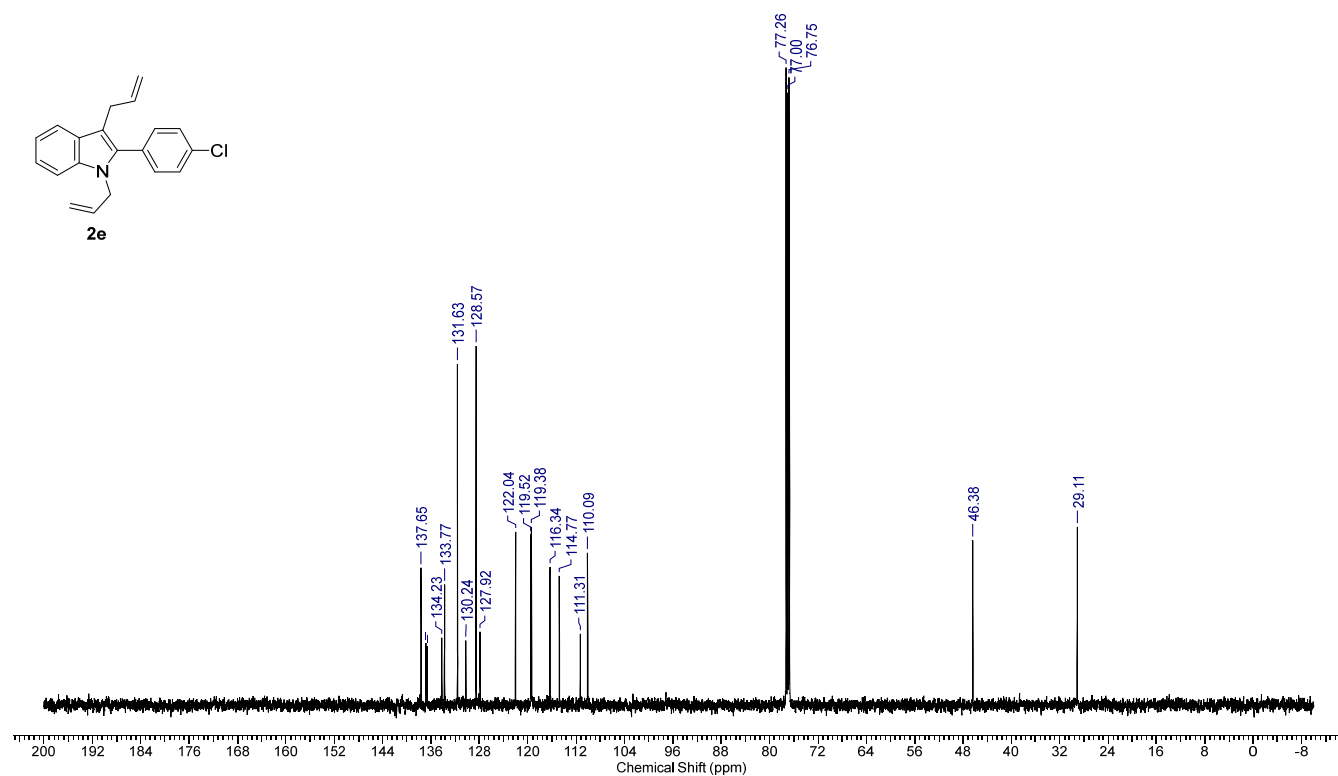

Enlarged view

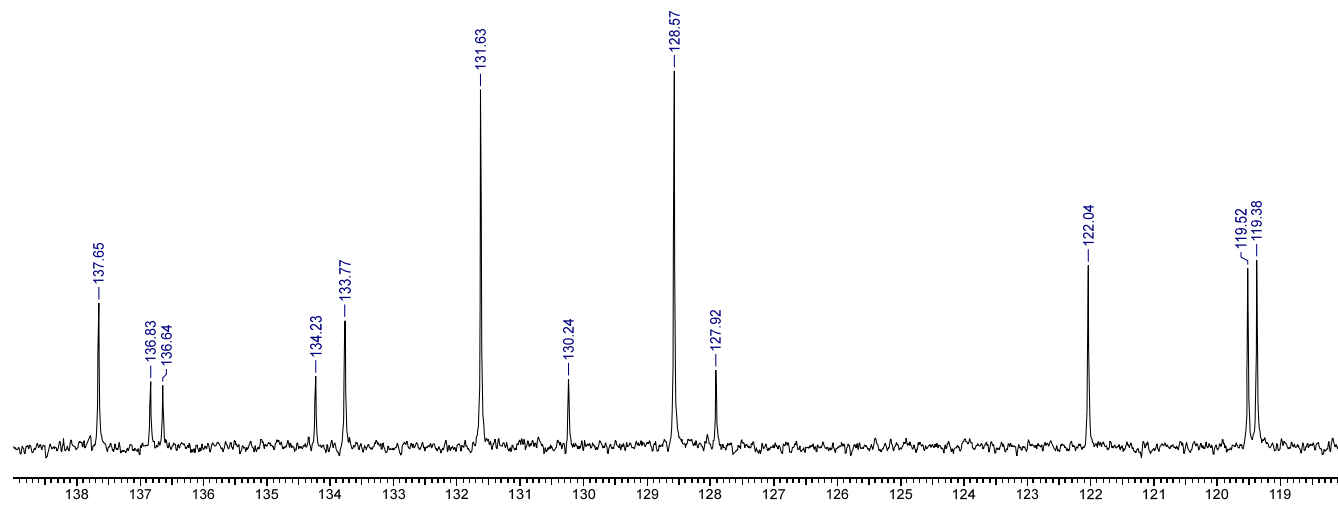

$^1\text{H}$  NMR (500 MHz,  $\text{CDCl}_3$ ) of **2f**

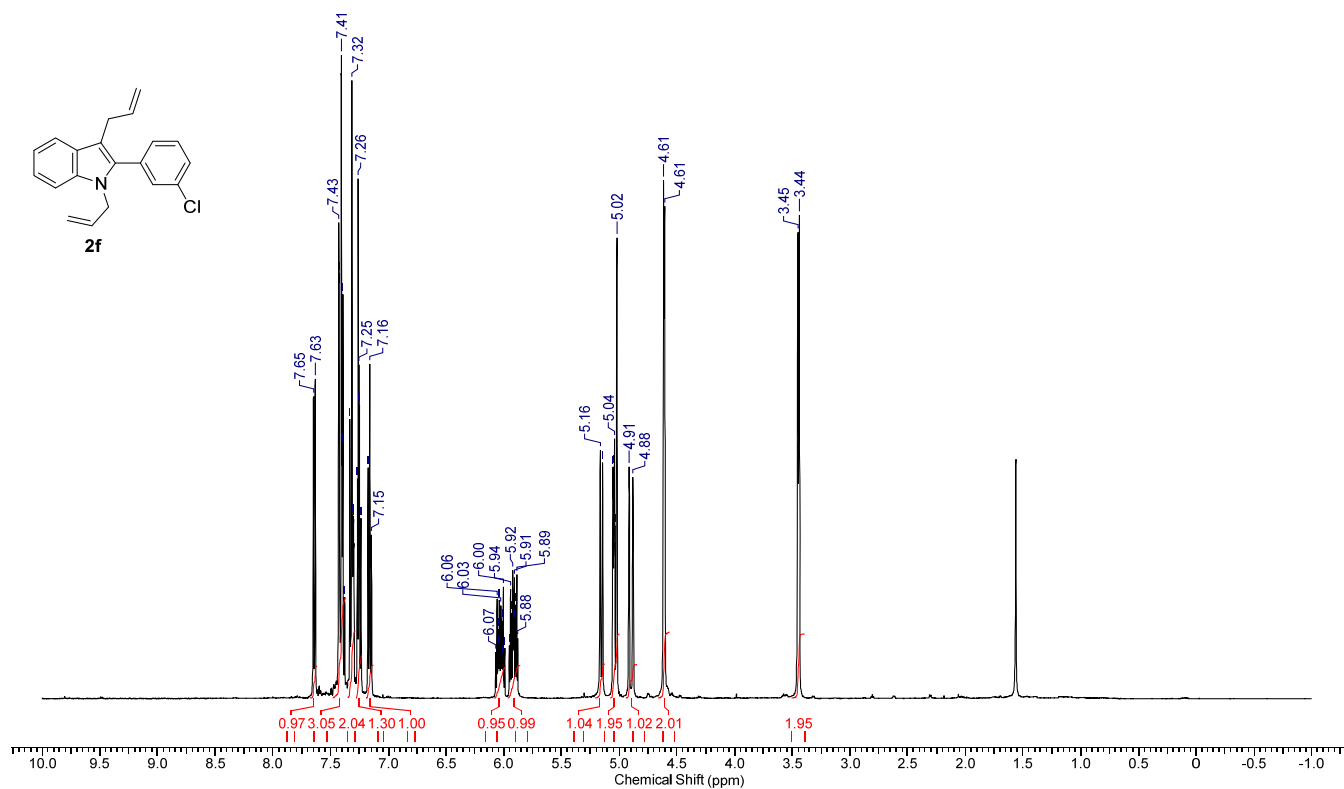

Enlarged view

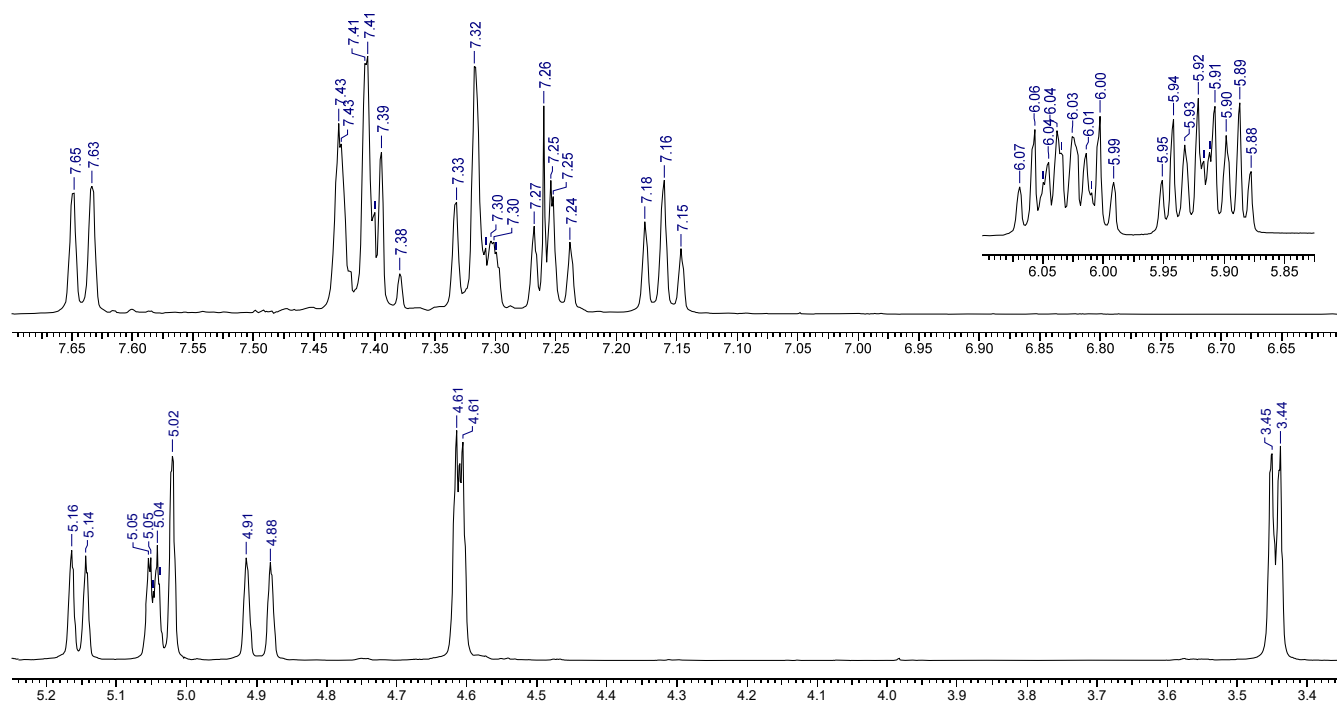

$^{13}\text{C}$  NMR (125 MHz,  $\text{CDCl}_3$ ) of **2f**

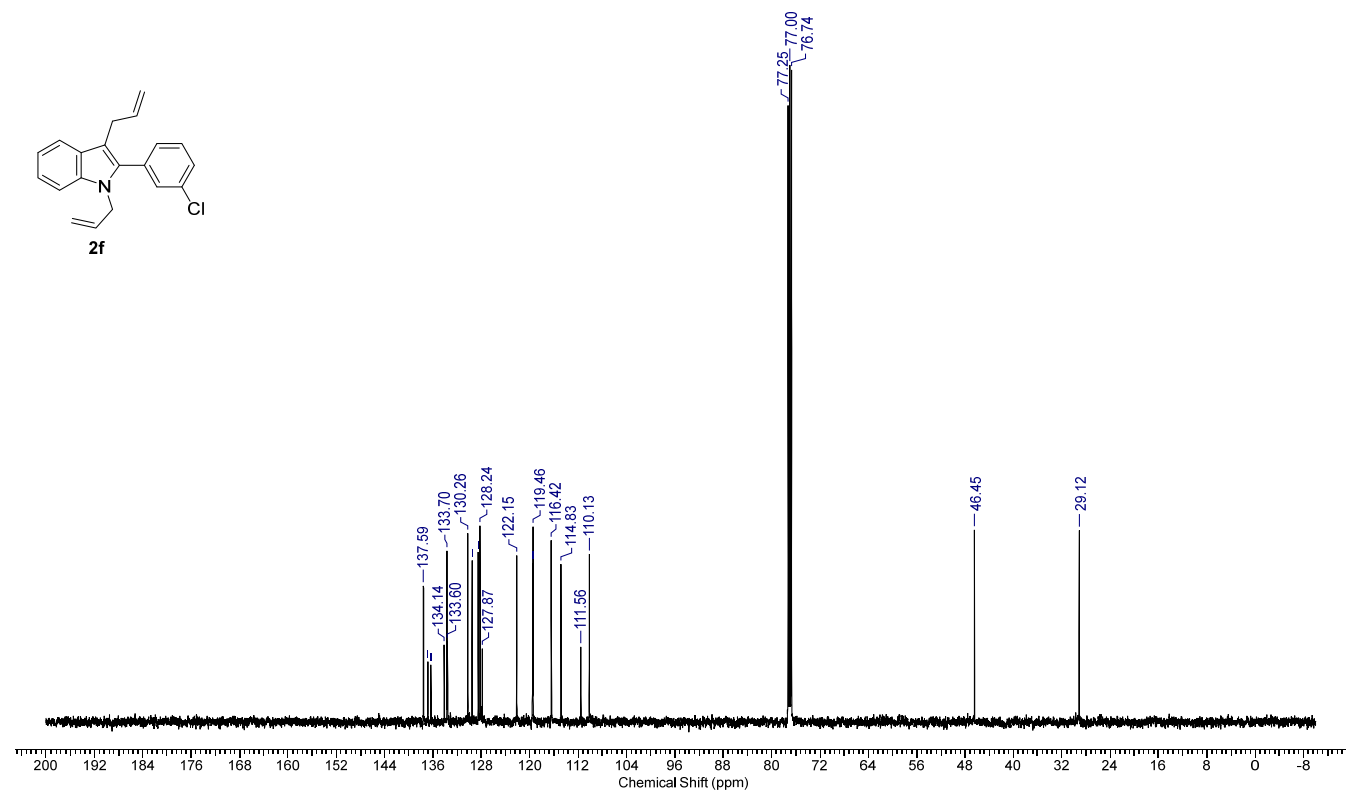

Enlarged view

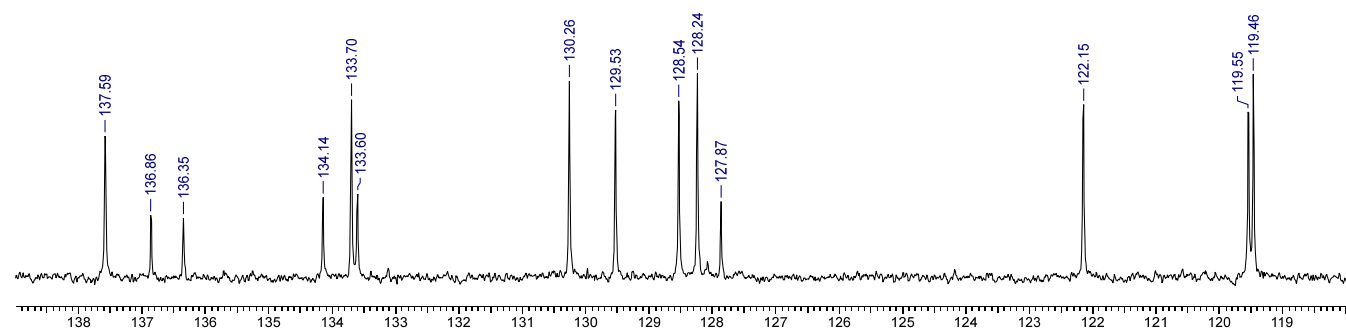

<sup>1</sup>H NMR (500 MHz, CDCl<sub>3</sub>) of **2h**

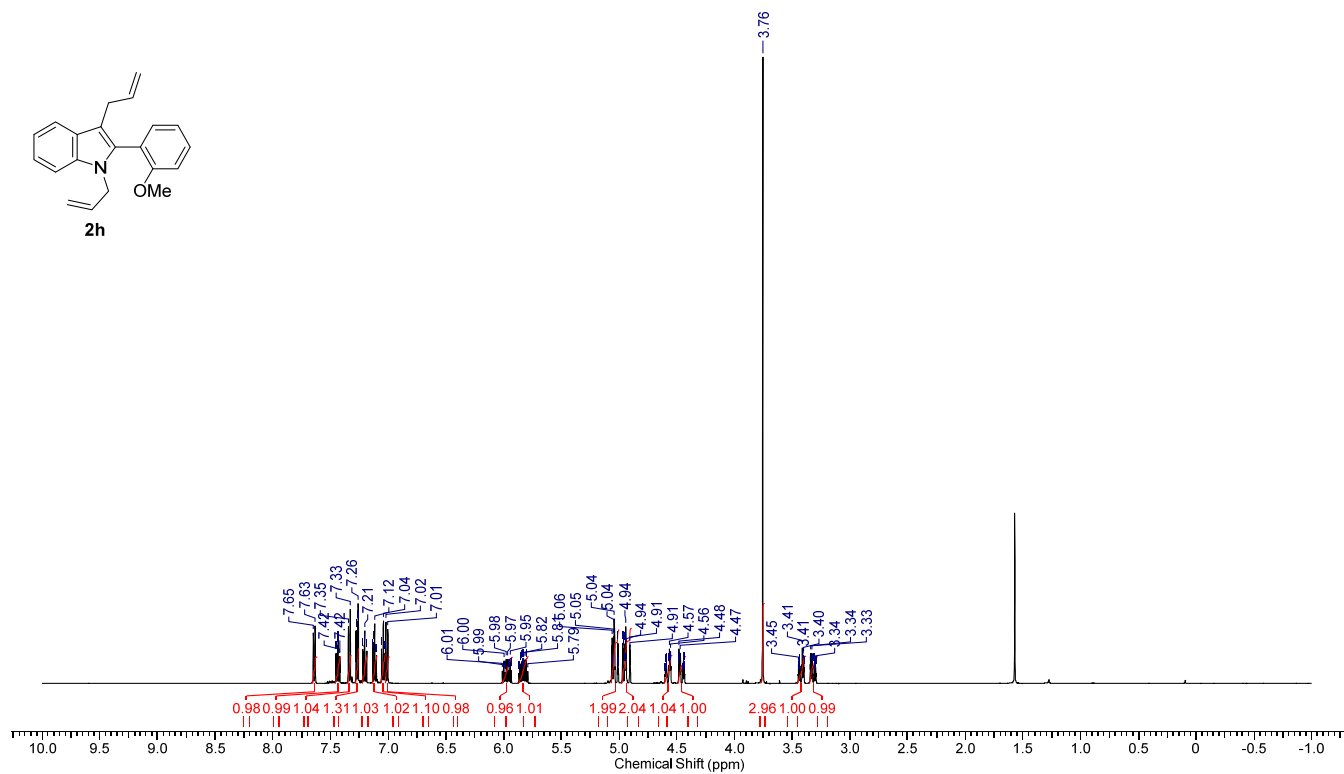

Enlarged view

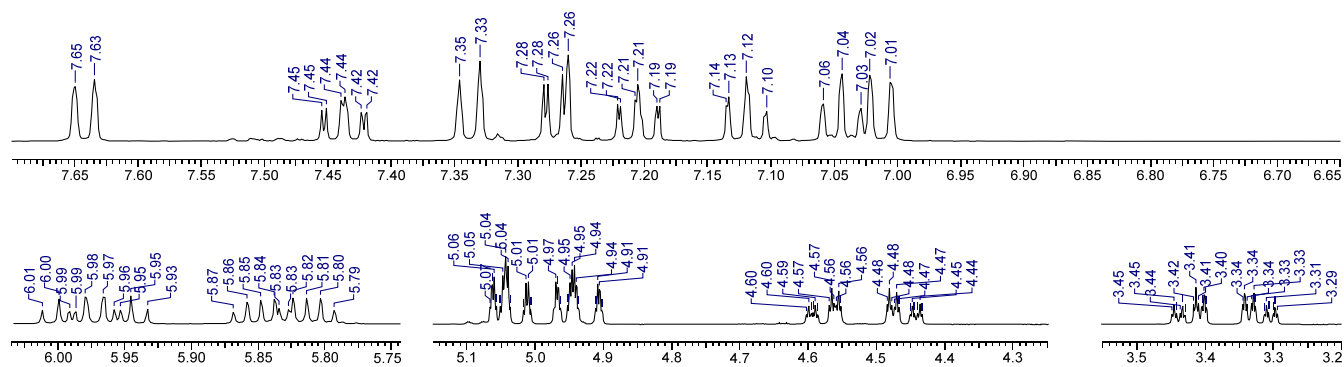

$^{13}\text{C}$  NMR (125 MHz,  $\text{CDCl}_3$ ) of **2h**

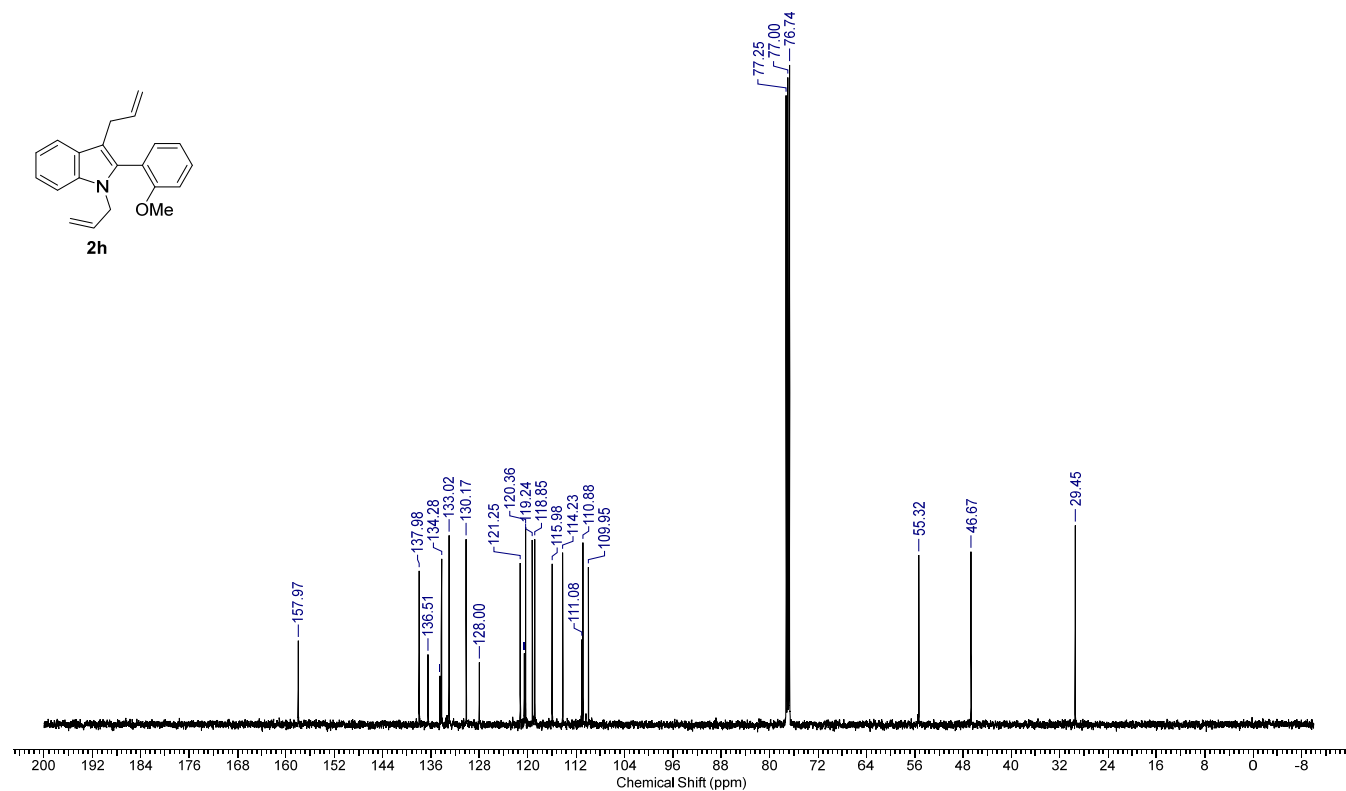

Enlarged view

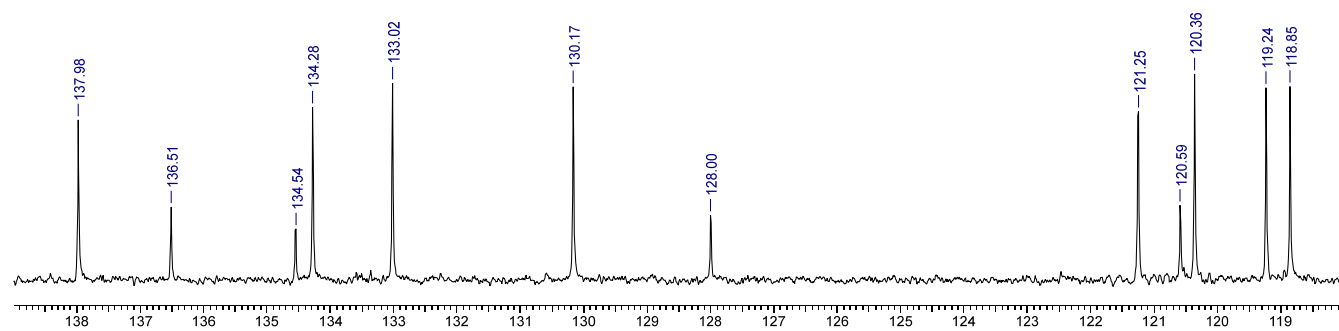



$^1\text{H}$  NMR (500 MHz,  $\text{CDCl}_3$ ) of **2i**

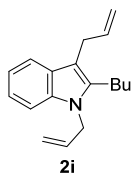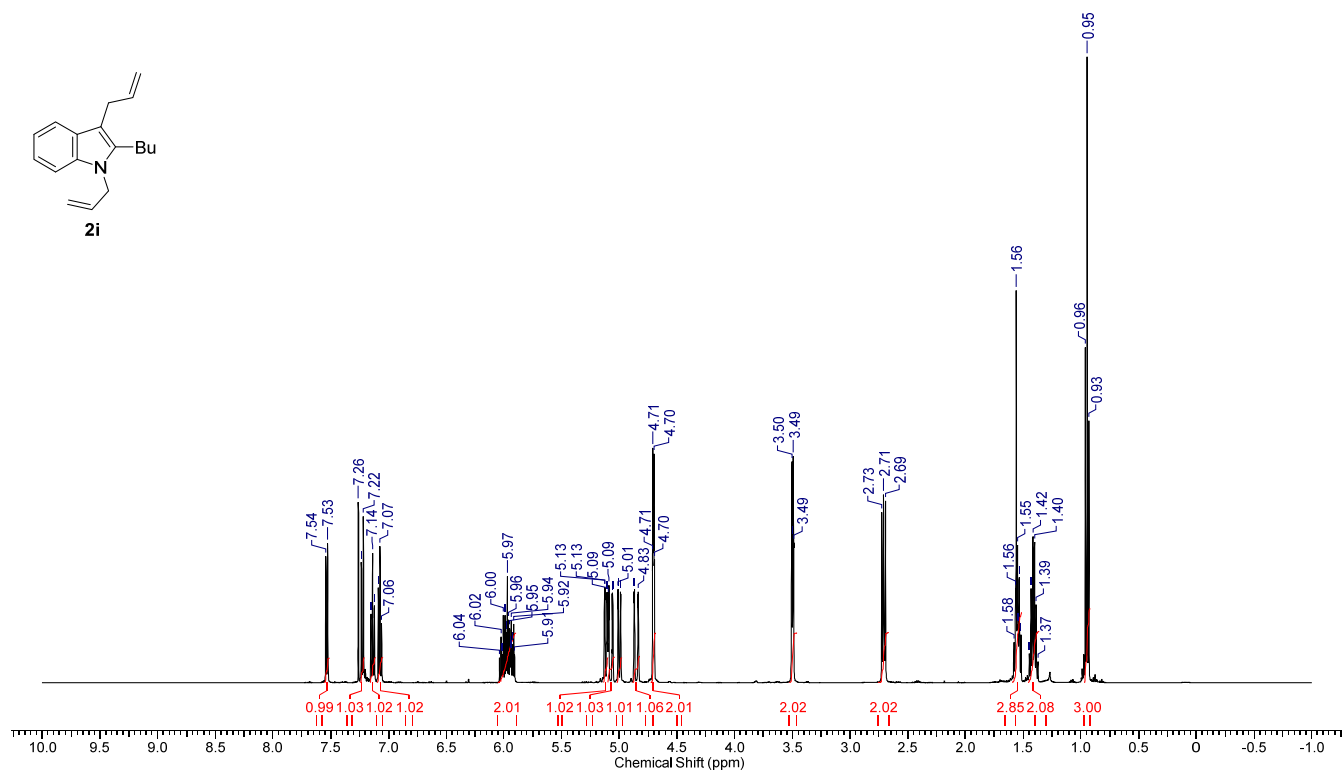

Enlarged view

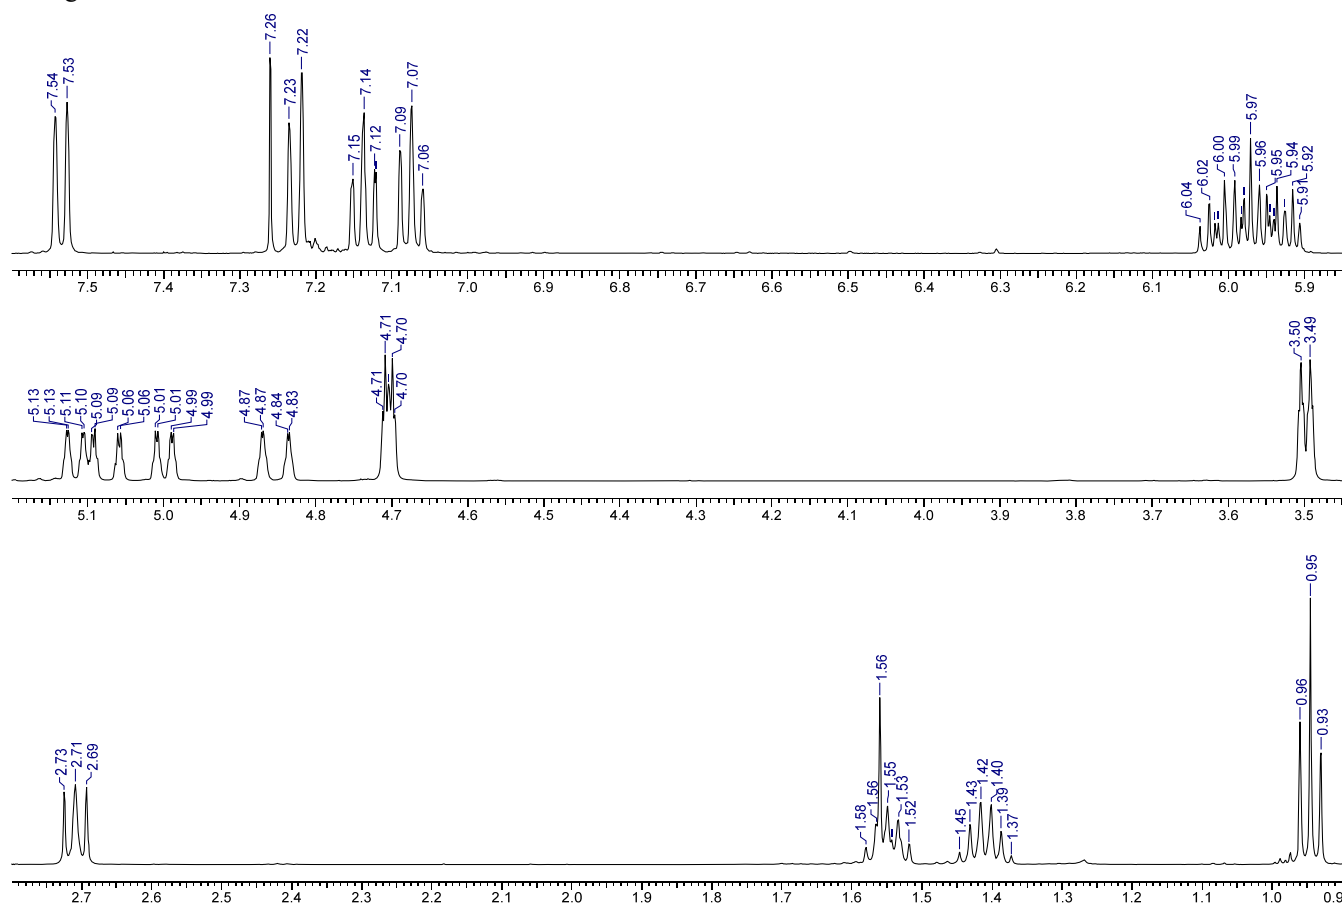

$^{13}\text{C}$  NMR (125 MHz,  $\text{CDCl}_3$ ) of **2i**

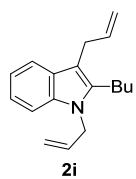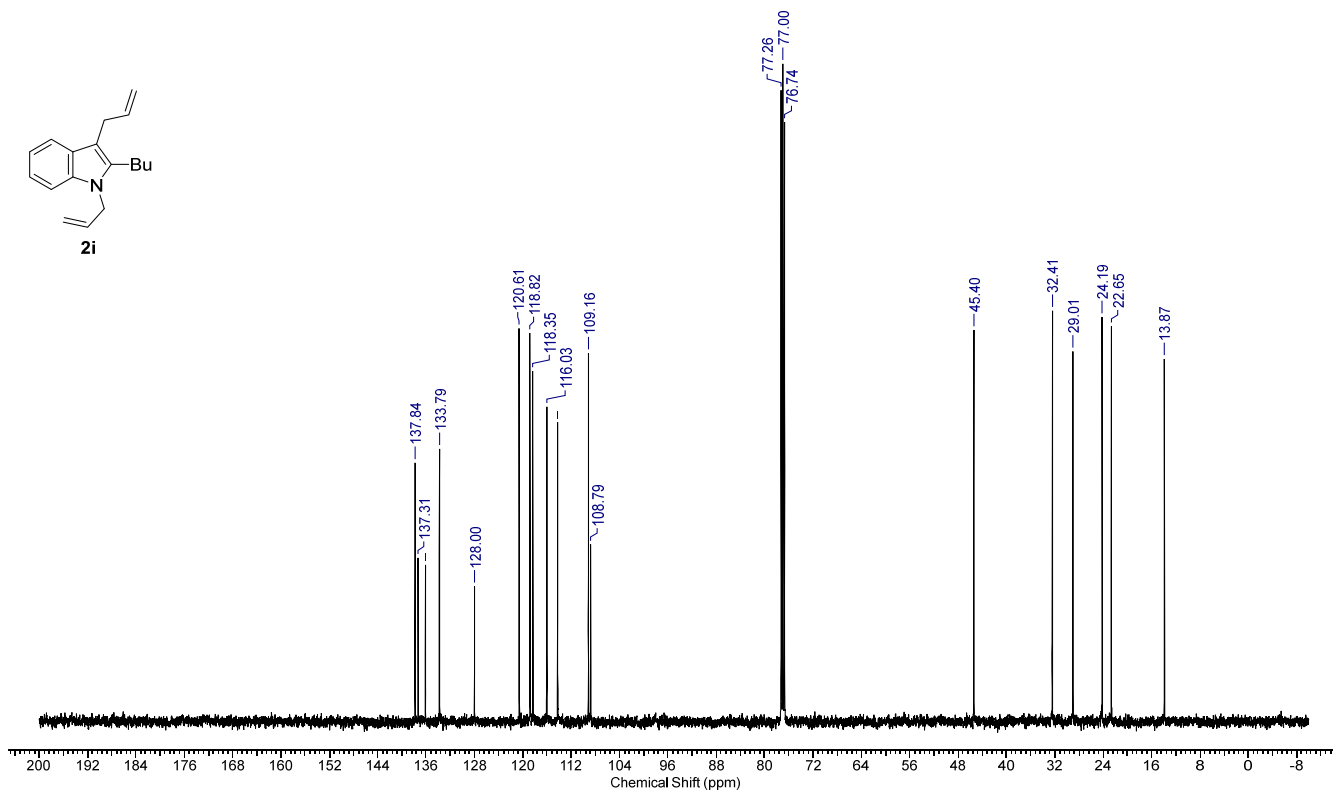

Enlarged view

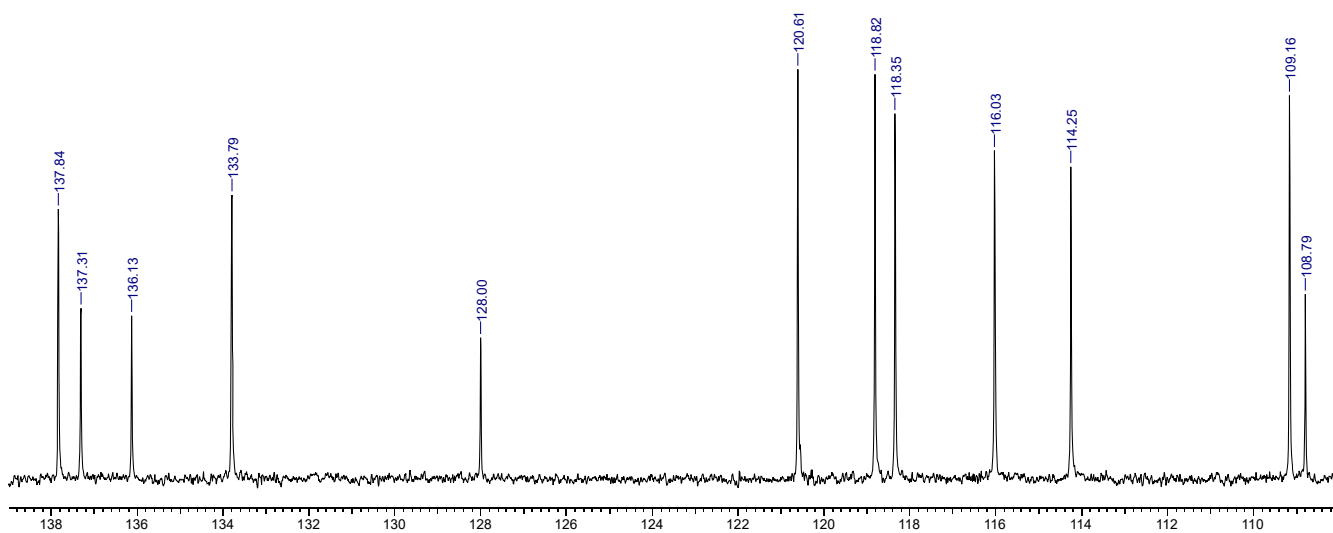

<sup>1</sup>H NMR (500 MHz, CDCl<sub>3</sub>) of **2j**

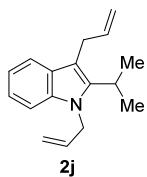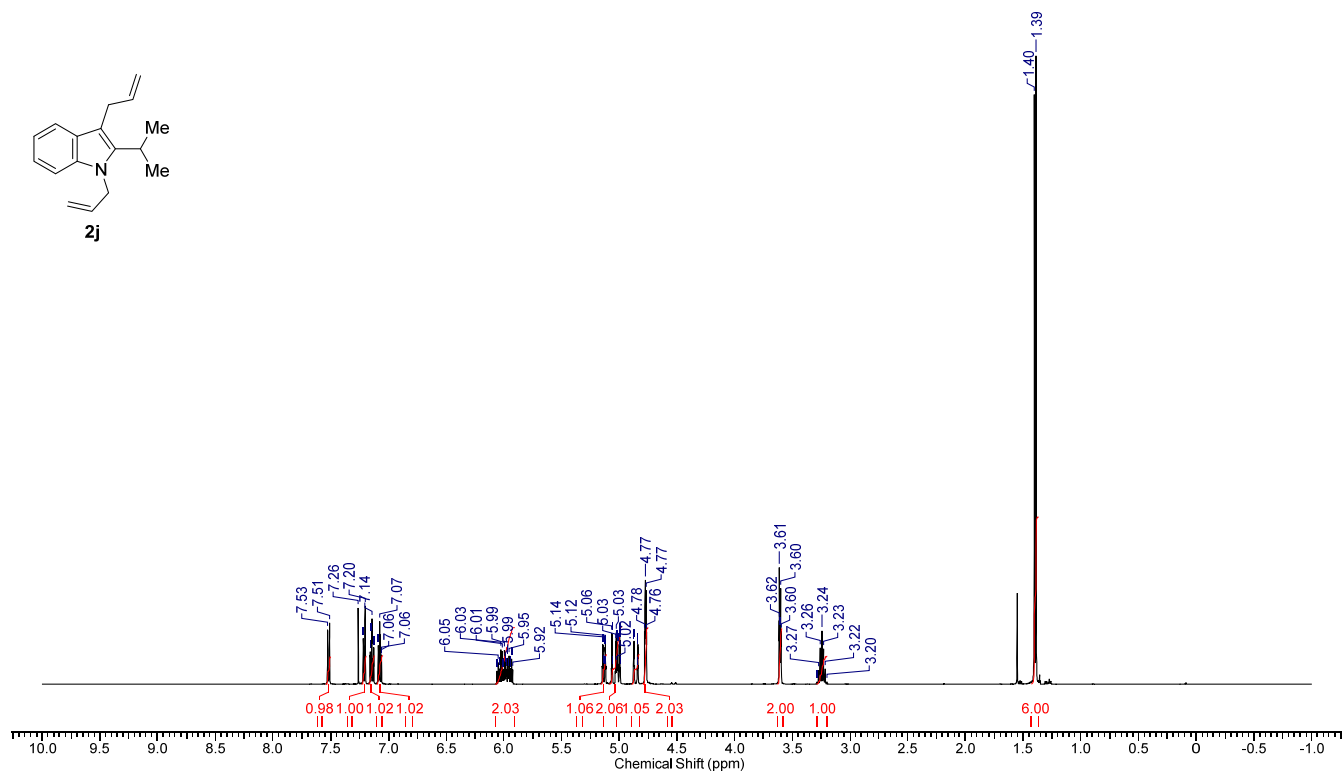

Enlarged view

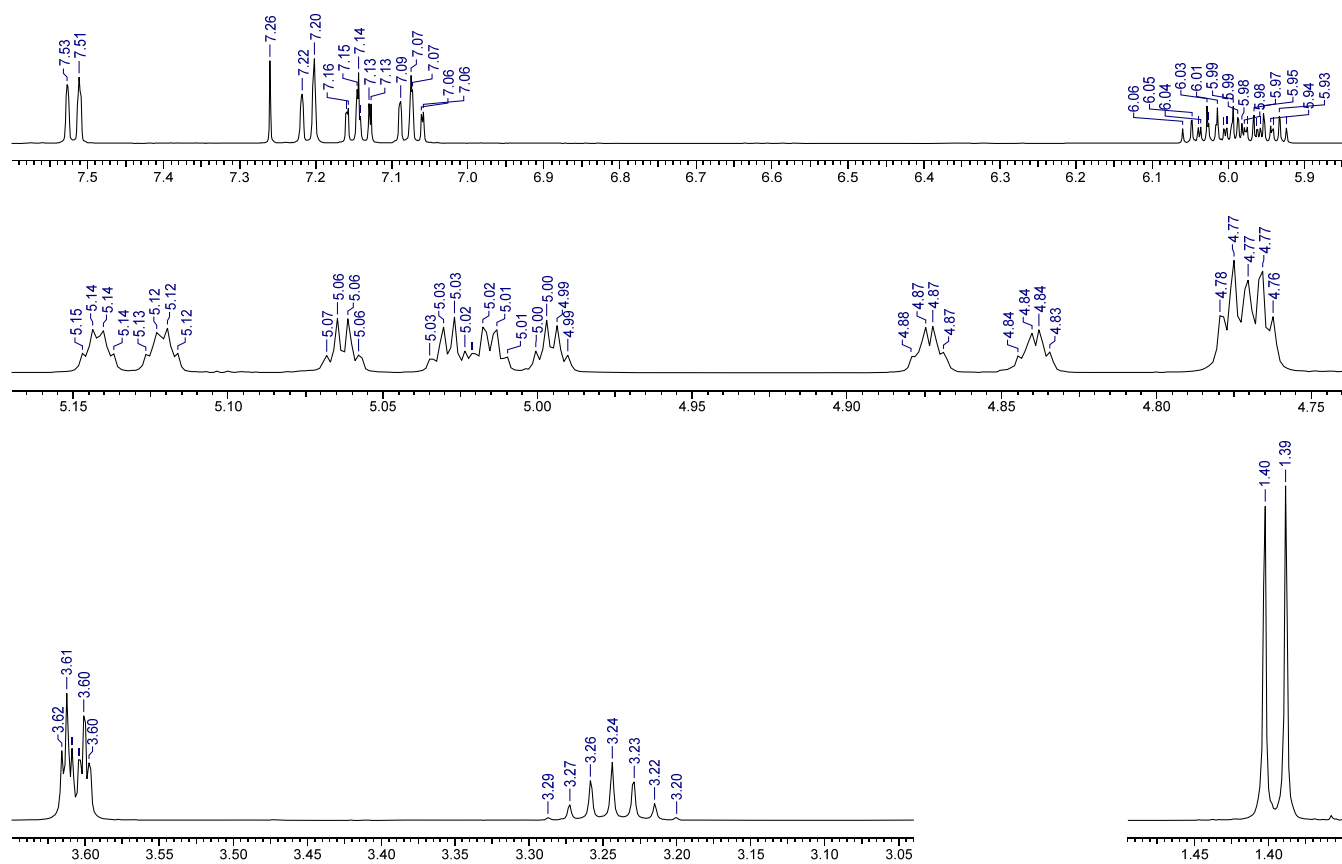

$^{13}\text{C}$  NMR (125 MHz,  $\text{CDCl}_3$ ) of **2j**

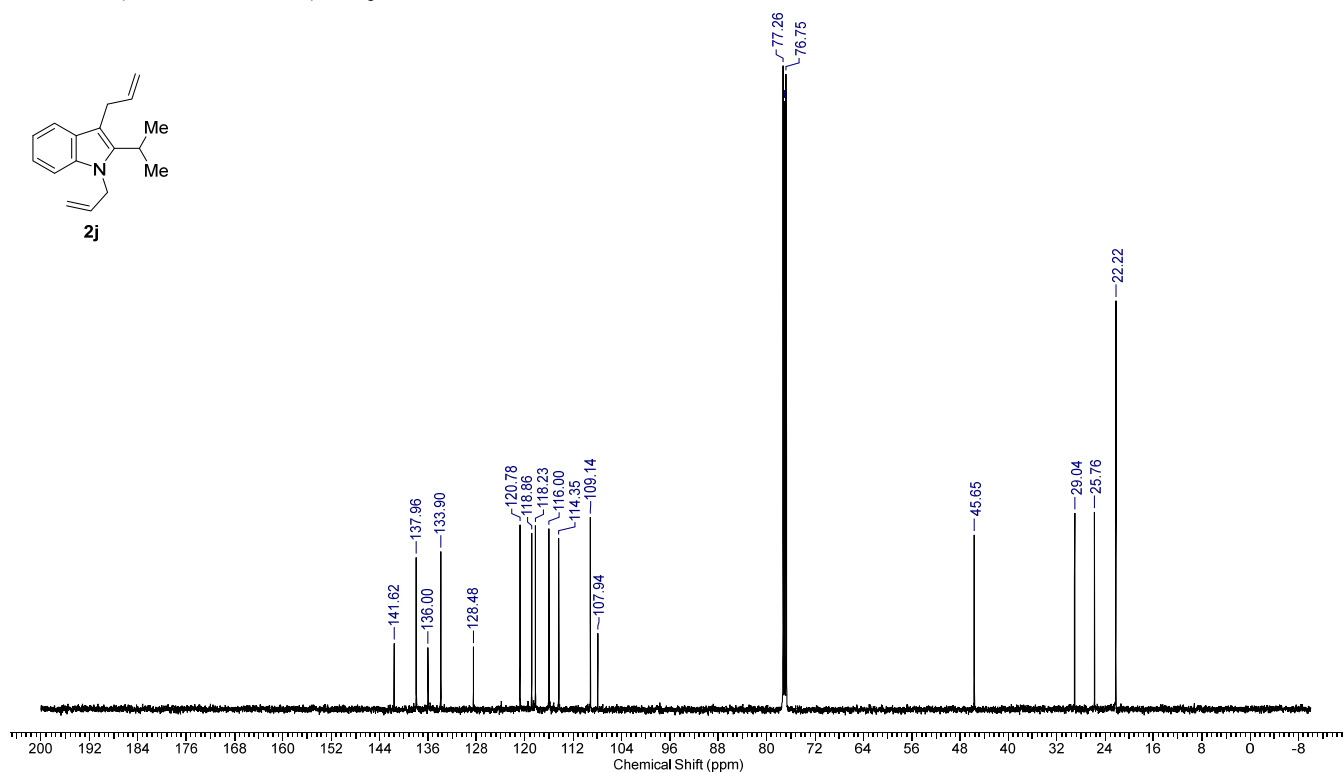

Enlarged view

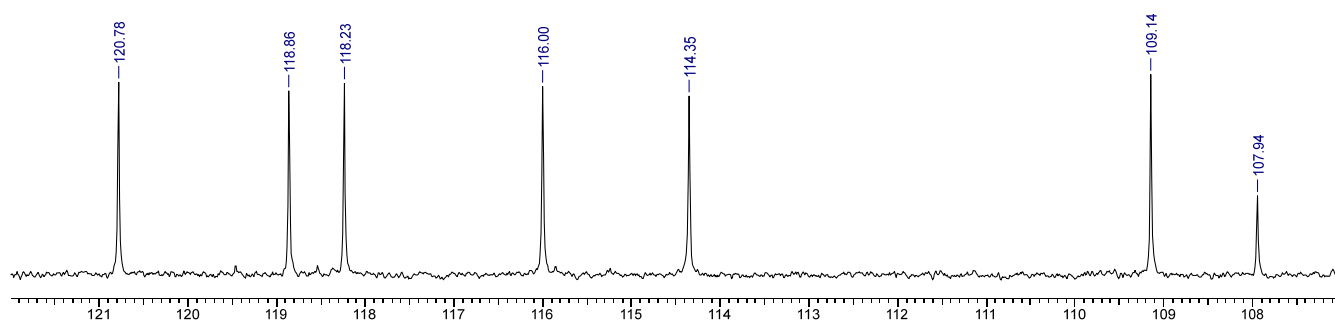

<sup>1</sup>H NMR (500 MHz, CDCl<sub>3</sub>) of **2k**

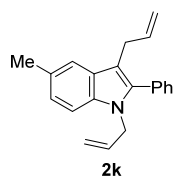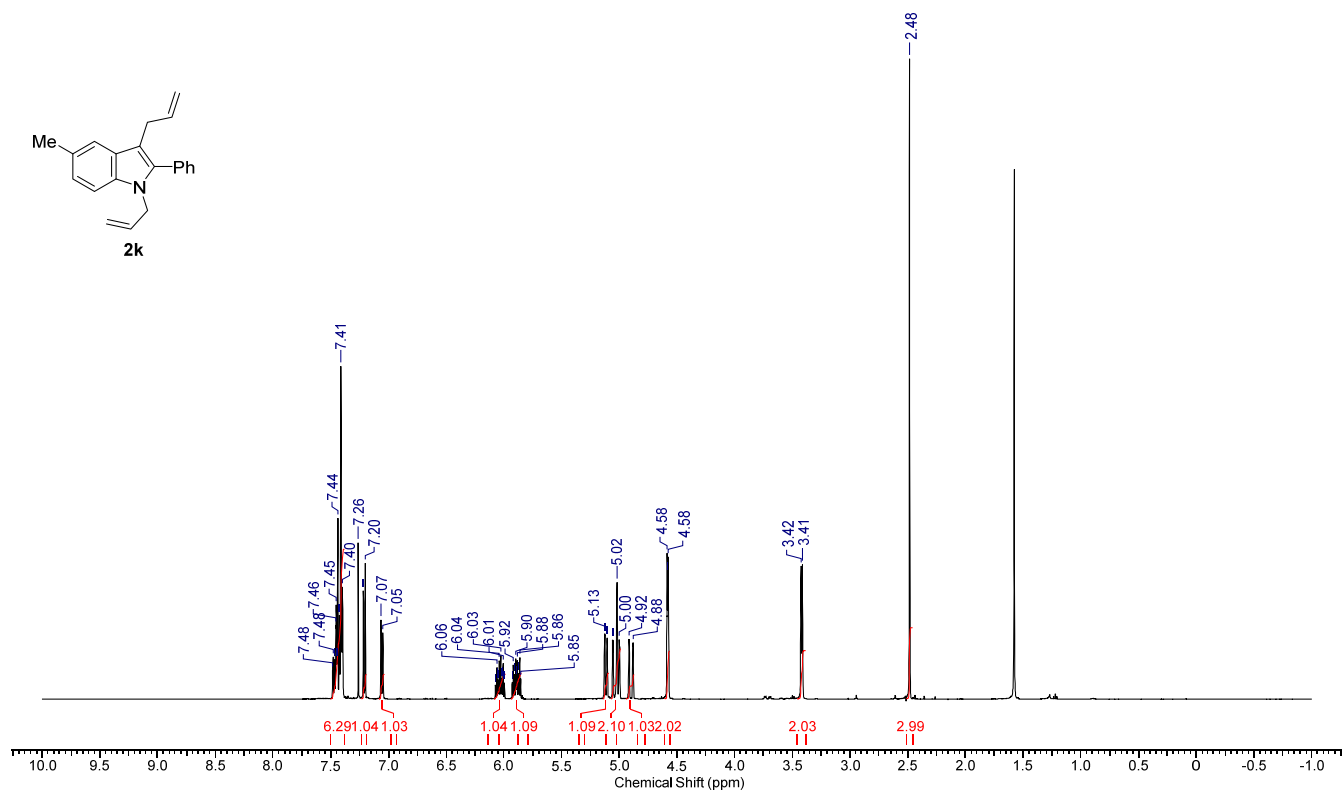

Enlarged view

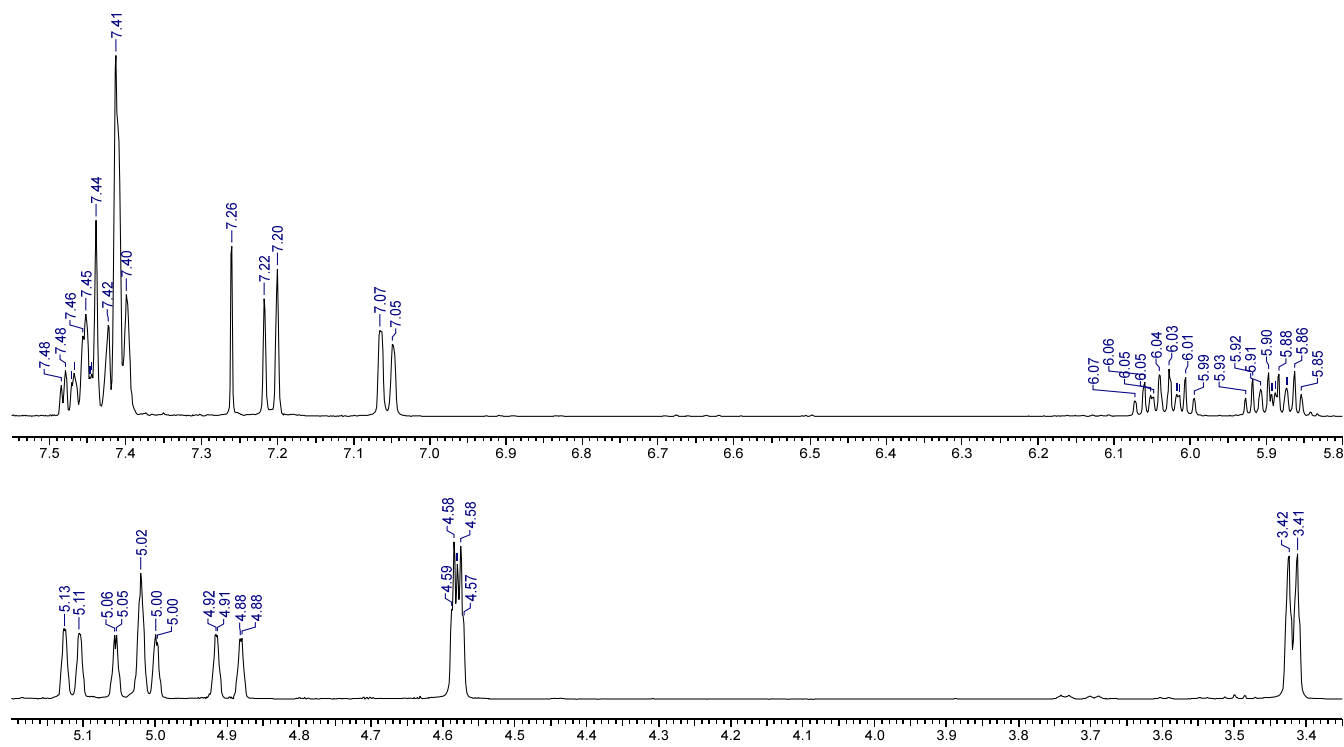

$^{13}\text{C}$  NMR (125 MHz,  $\text{CDCl}_3$ ) of **2k**

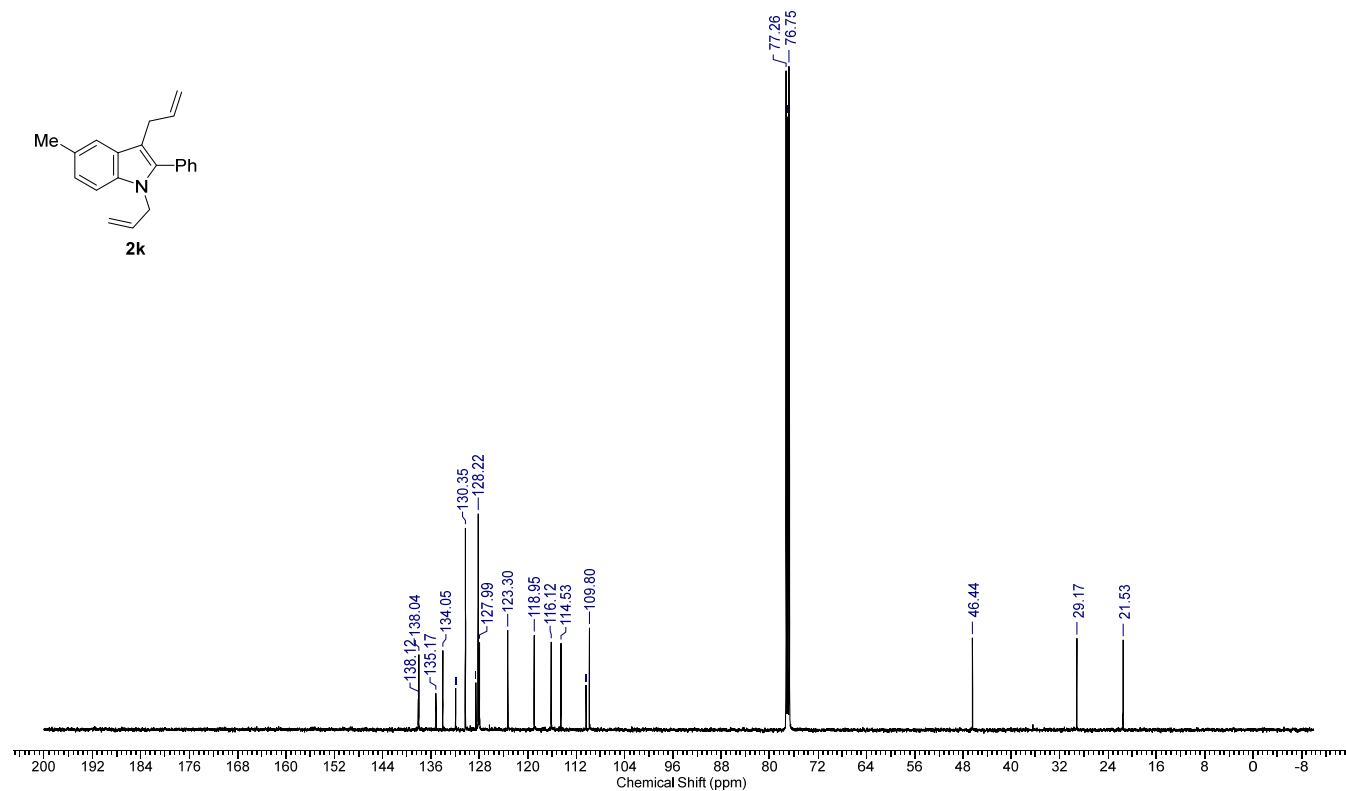

Enlarged view

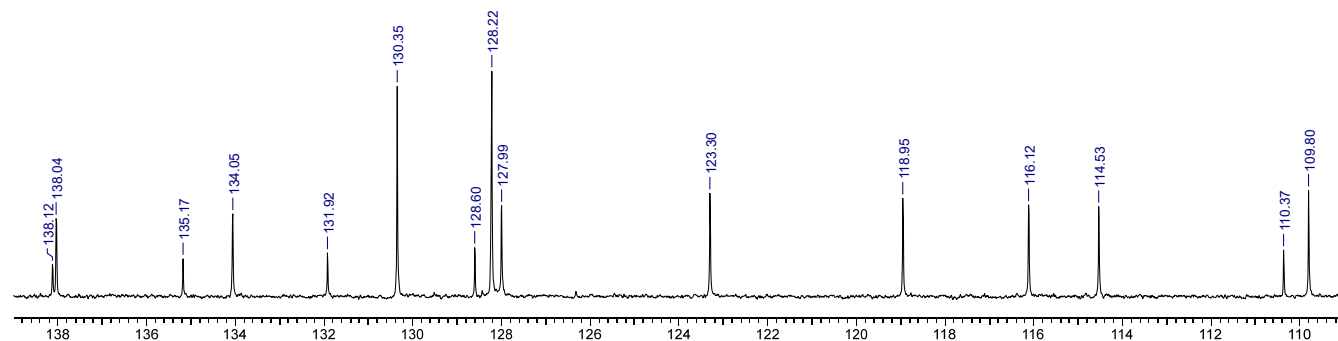

<sup>1</sup>H NMR (500 MHz, CDCl<sub>3</sub>) of **21**

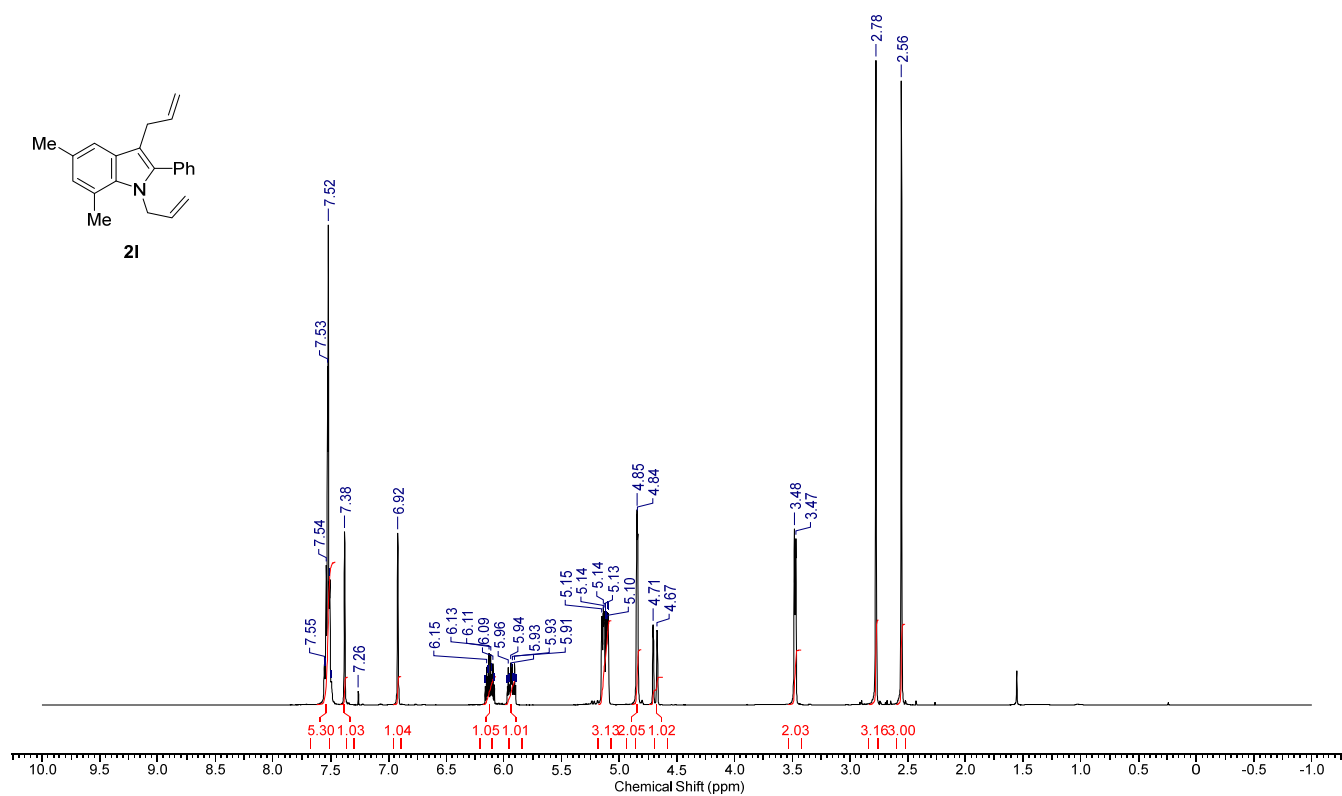

Enlarged view

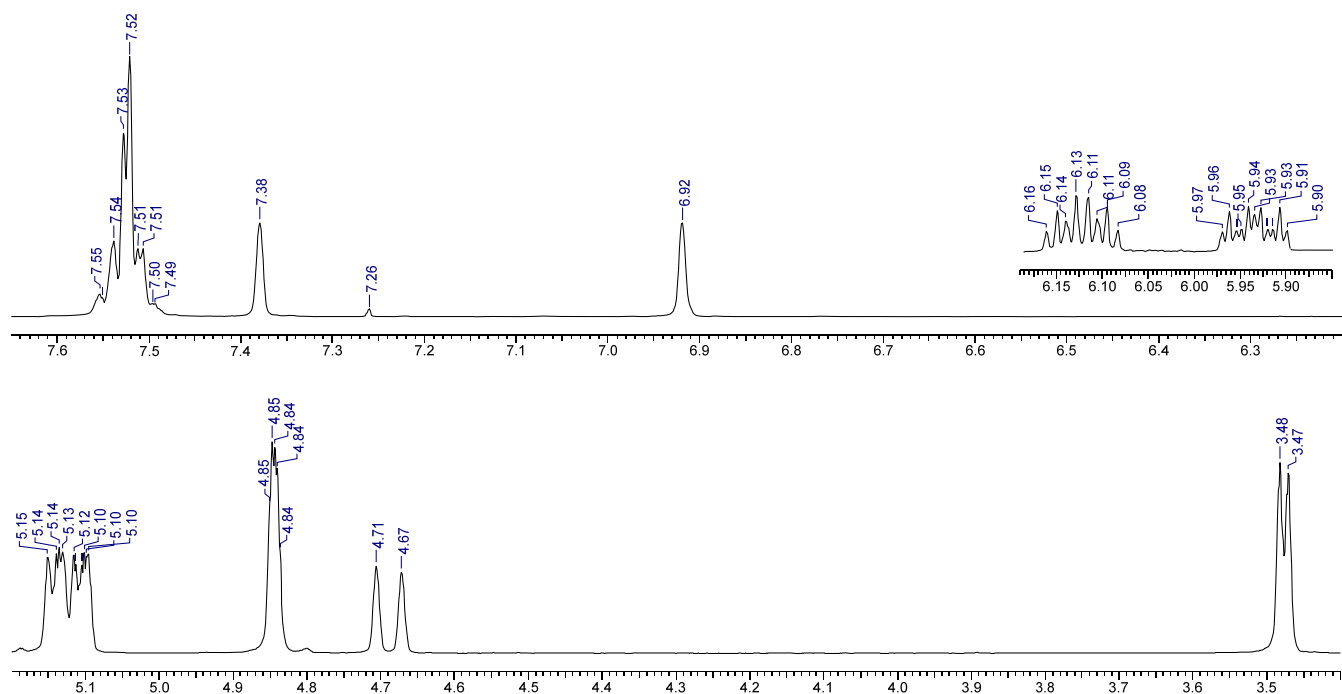

<sup>13</sup>C NMR (125 MHz, CDCl<sub>3</sub>) of **21**

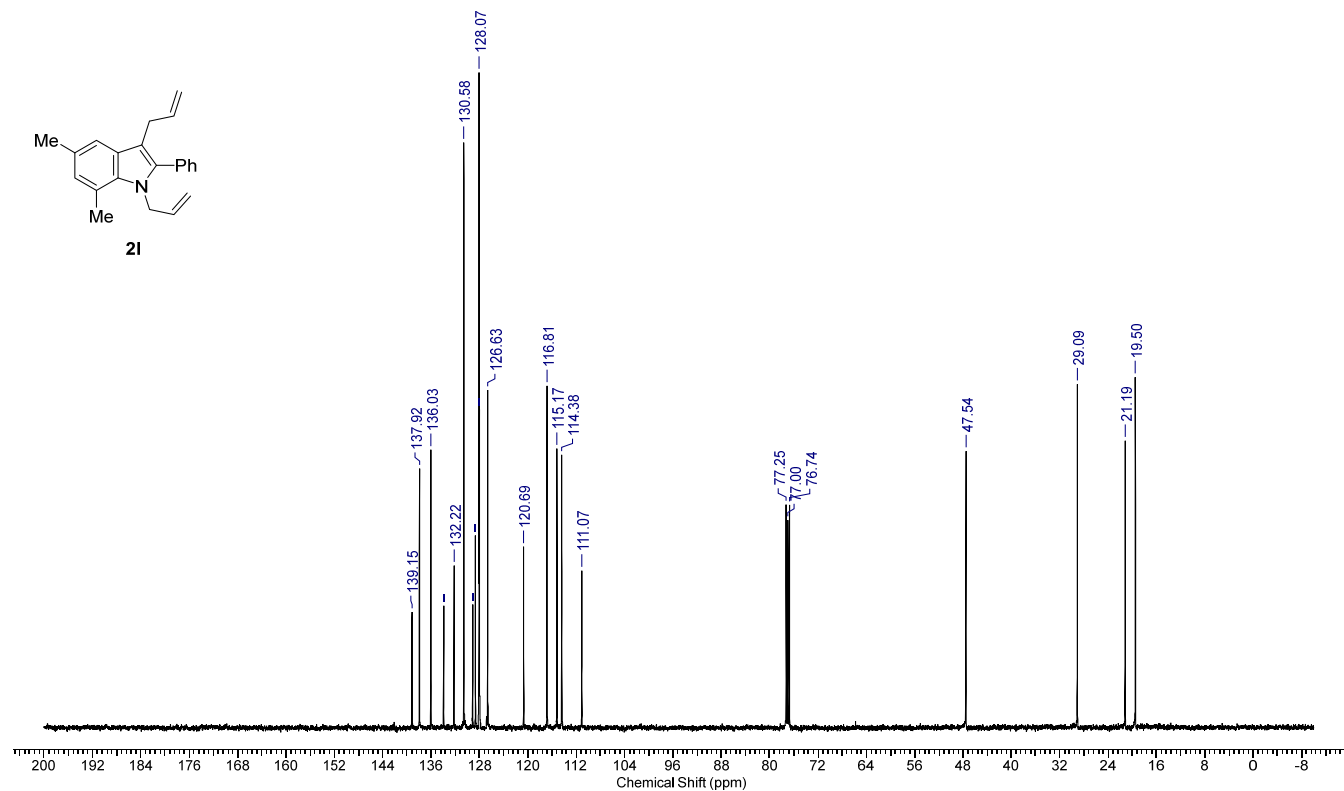

Enlarged view

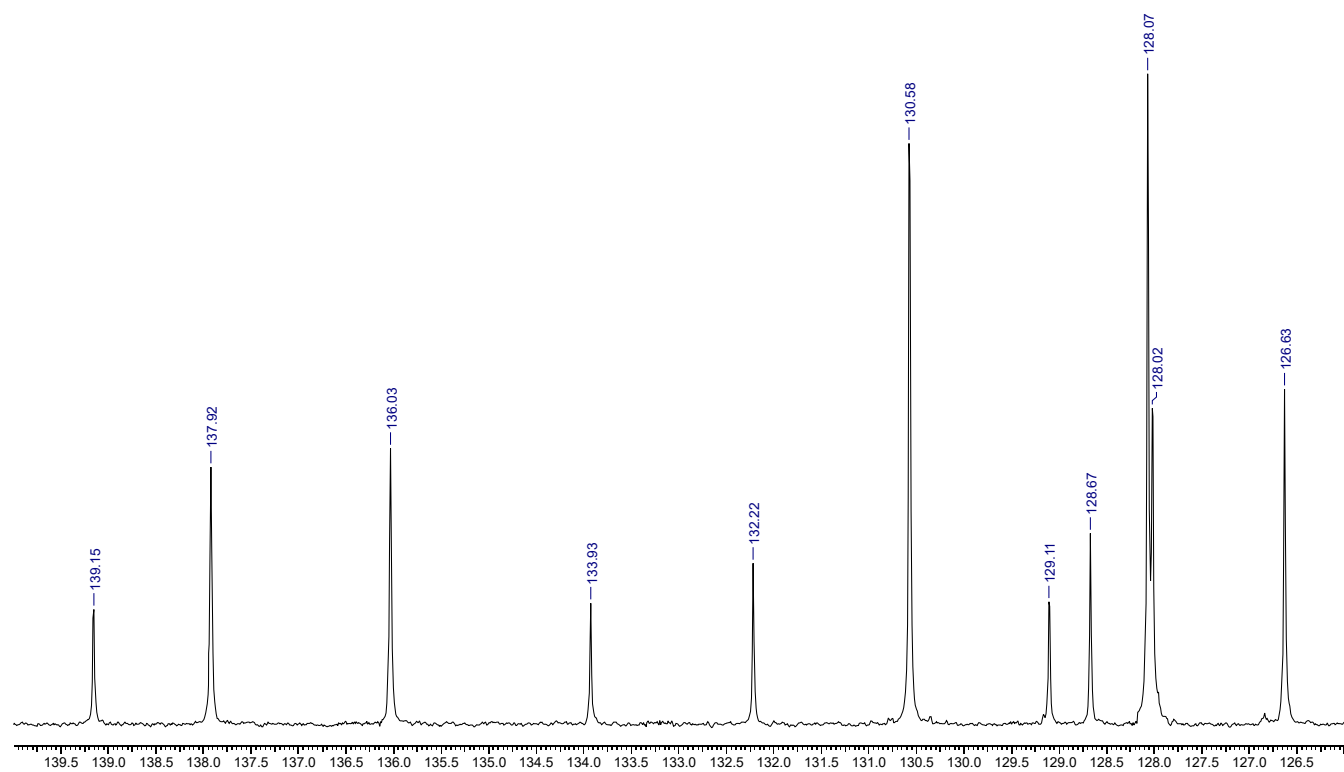



<sup>1</sup>H NMR (500 MHz, CDCl<sub>3</sub>) of **2m**

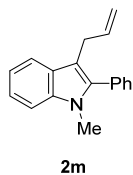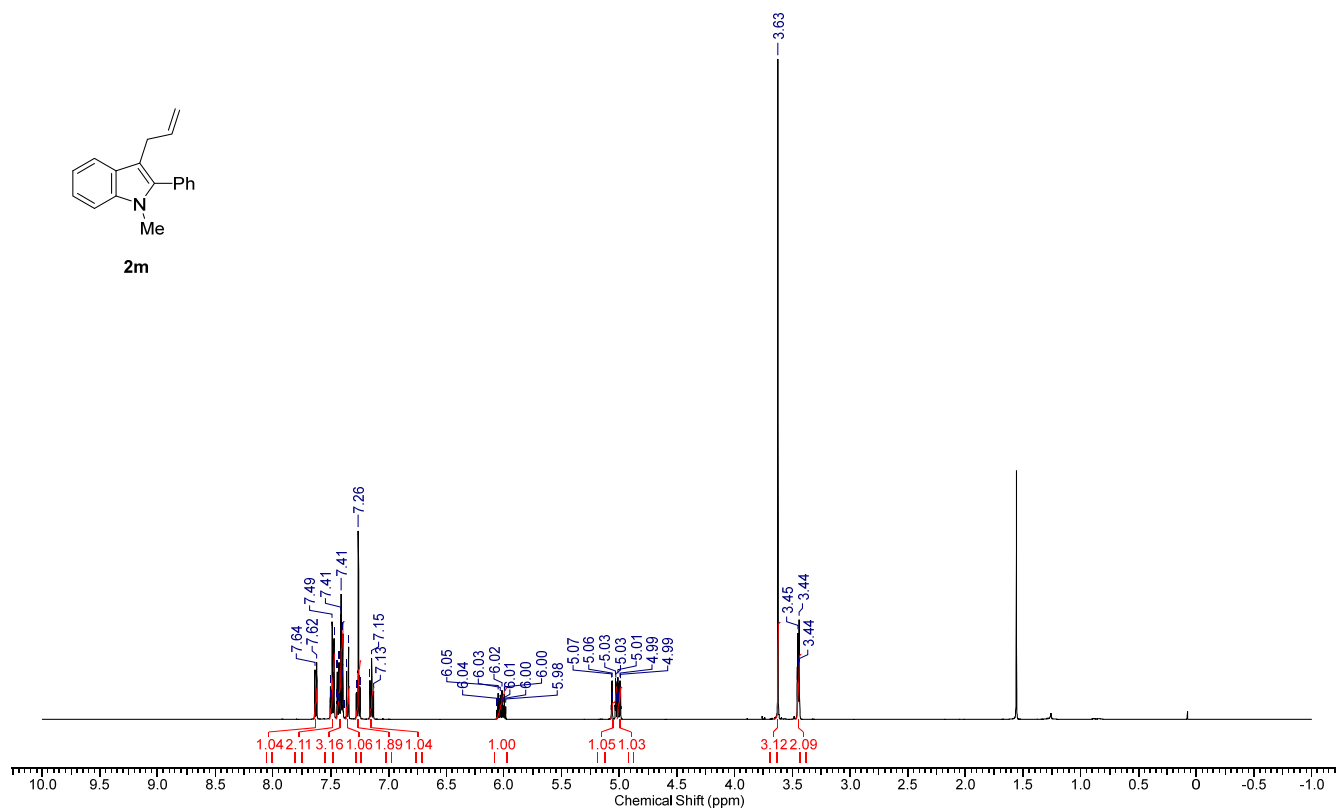

Enlarged view

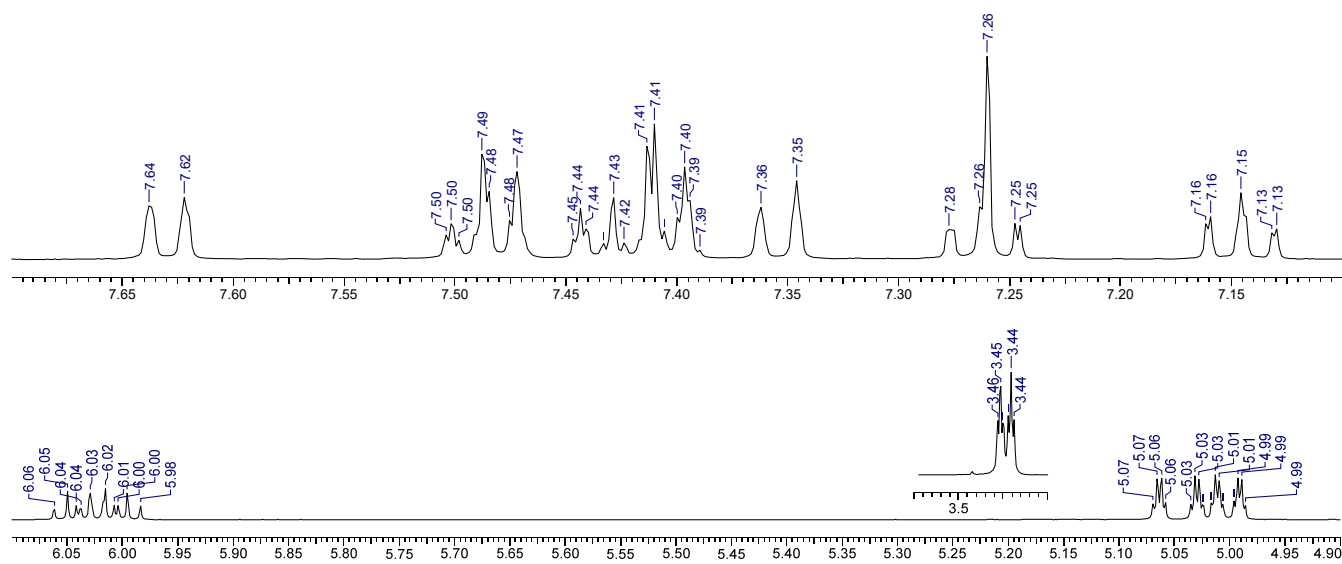

$^{13}\text{C}$  NMR (125 MHz,  $\text{CDCl}_3$ ) of **2m**

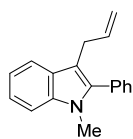

**2m**

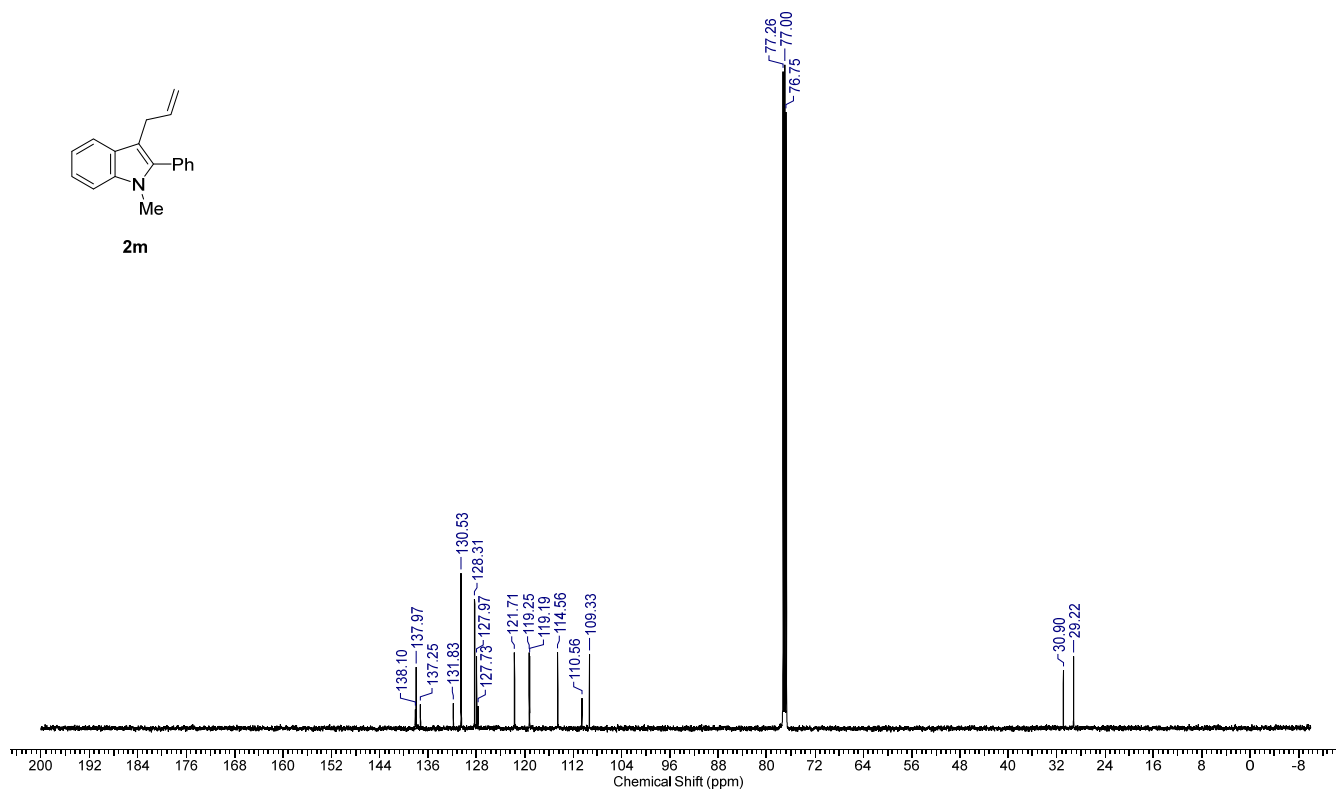

Enlarged view

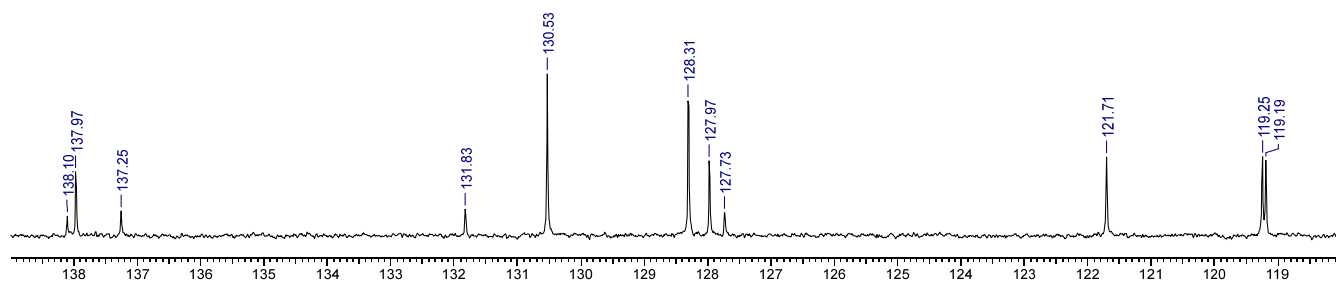

$^1\text{H}$  NMR (500 MHz,  $\text{CDCl}_3$ ) of **2n**

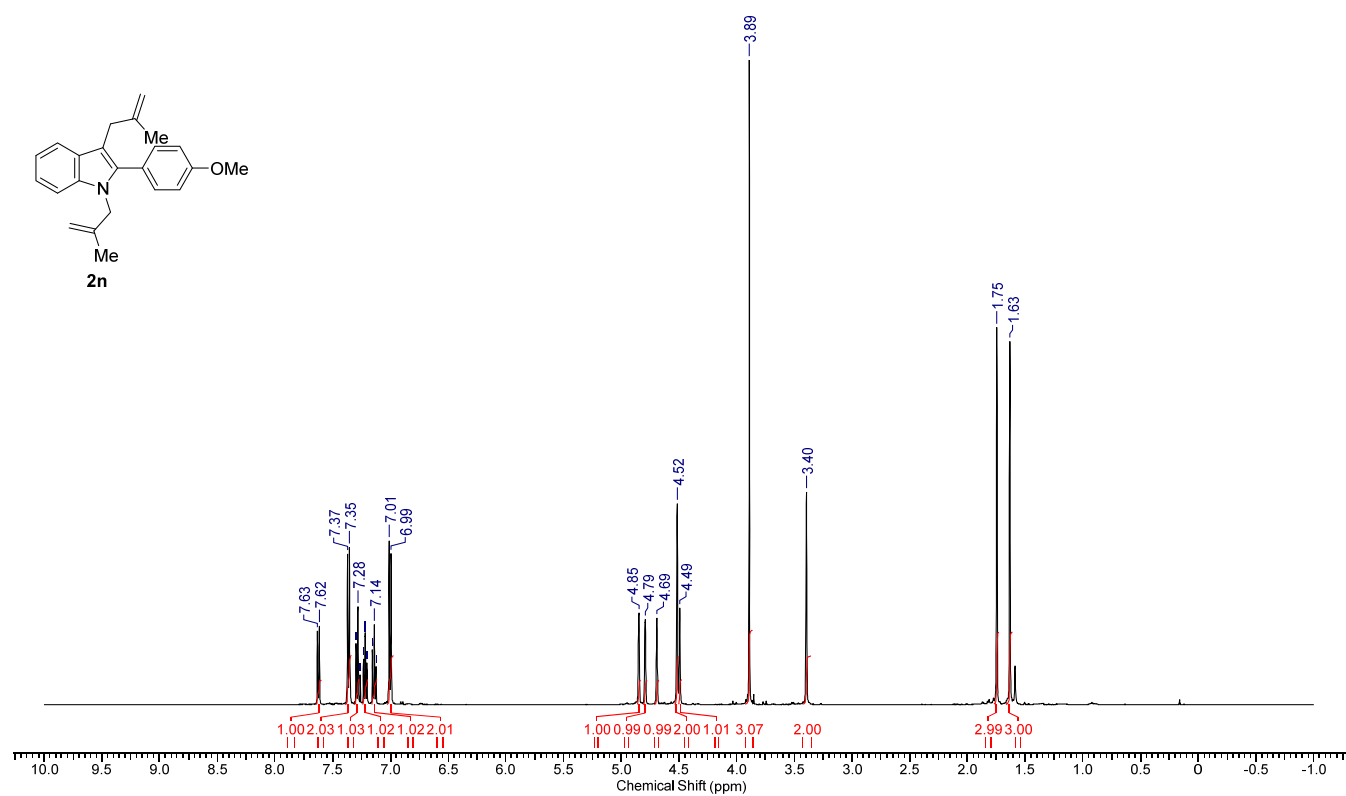

Enlarged view

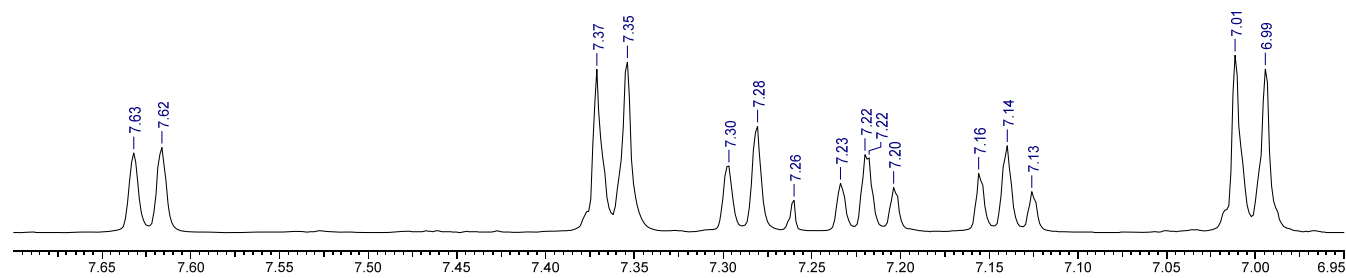

$^{13}\text{C}$  NMR (125 MHz,  $\text{CDCl}_3$ ) of **2n**

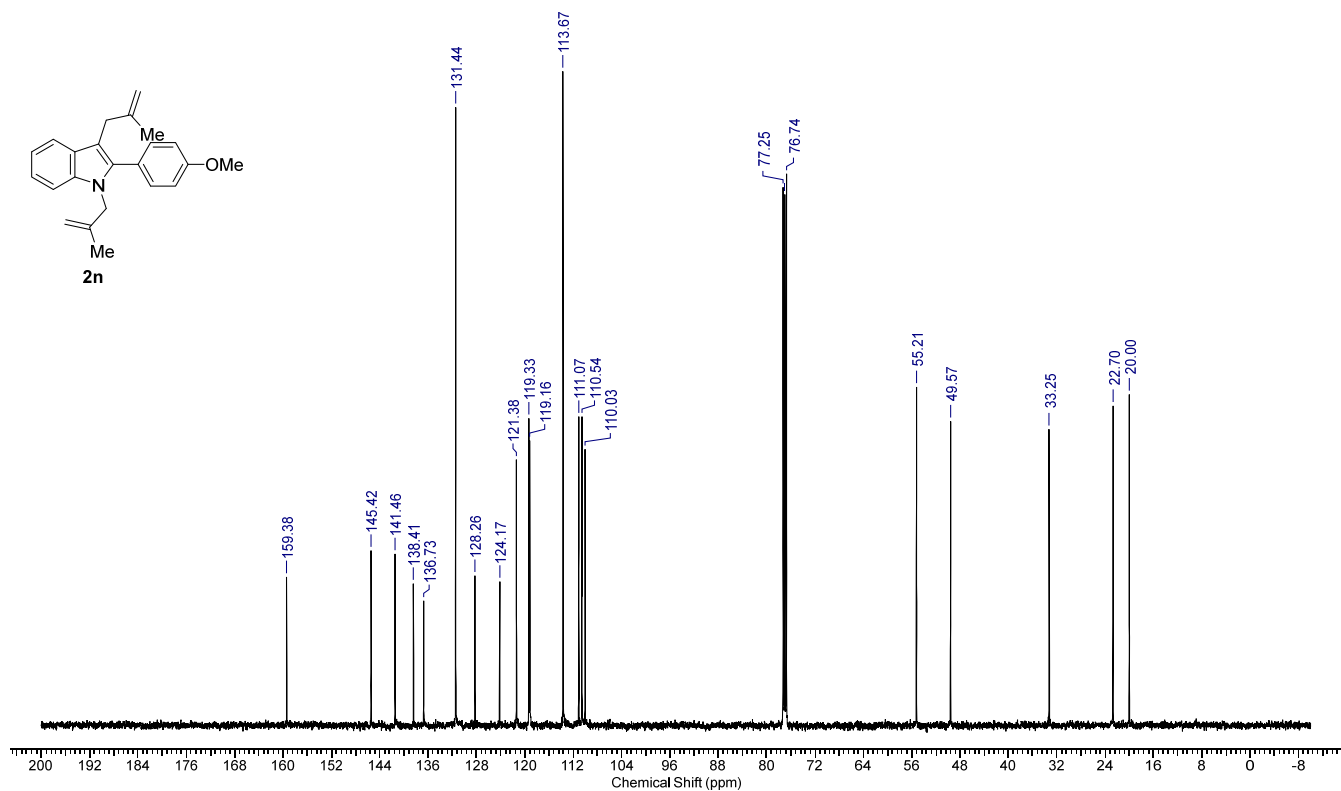

Enlarged view

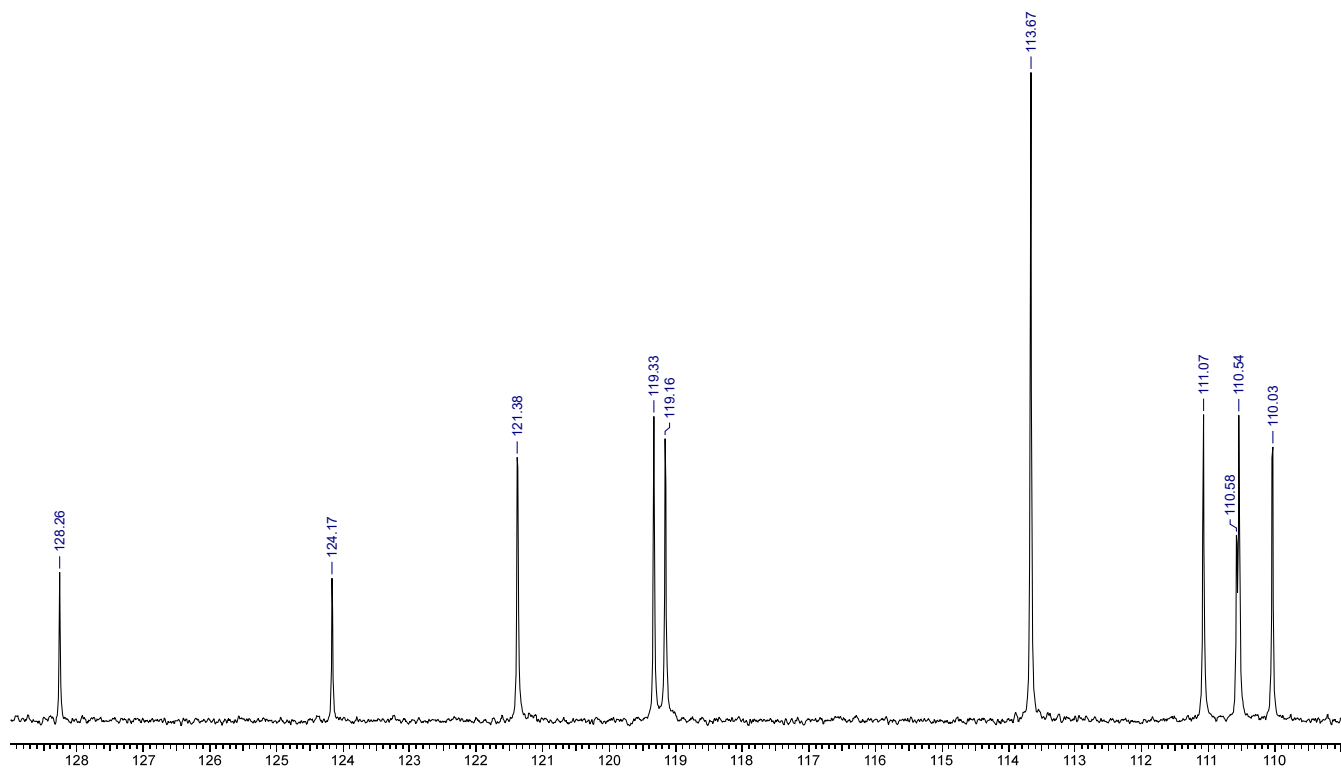

$^1\text{H}$  NMR (500 MHz,  $\text{CDCl}_3$ ) of **2o** and **2o'** (**2o**:**2o'** = 64:36)

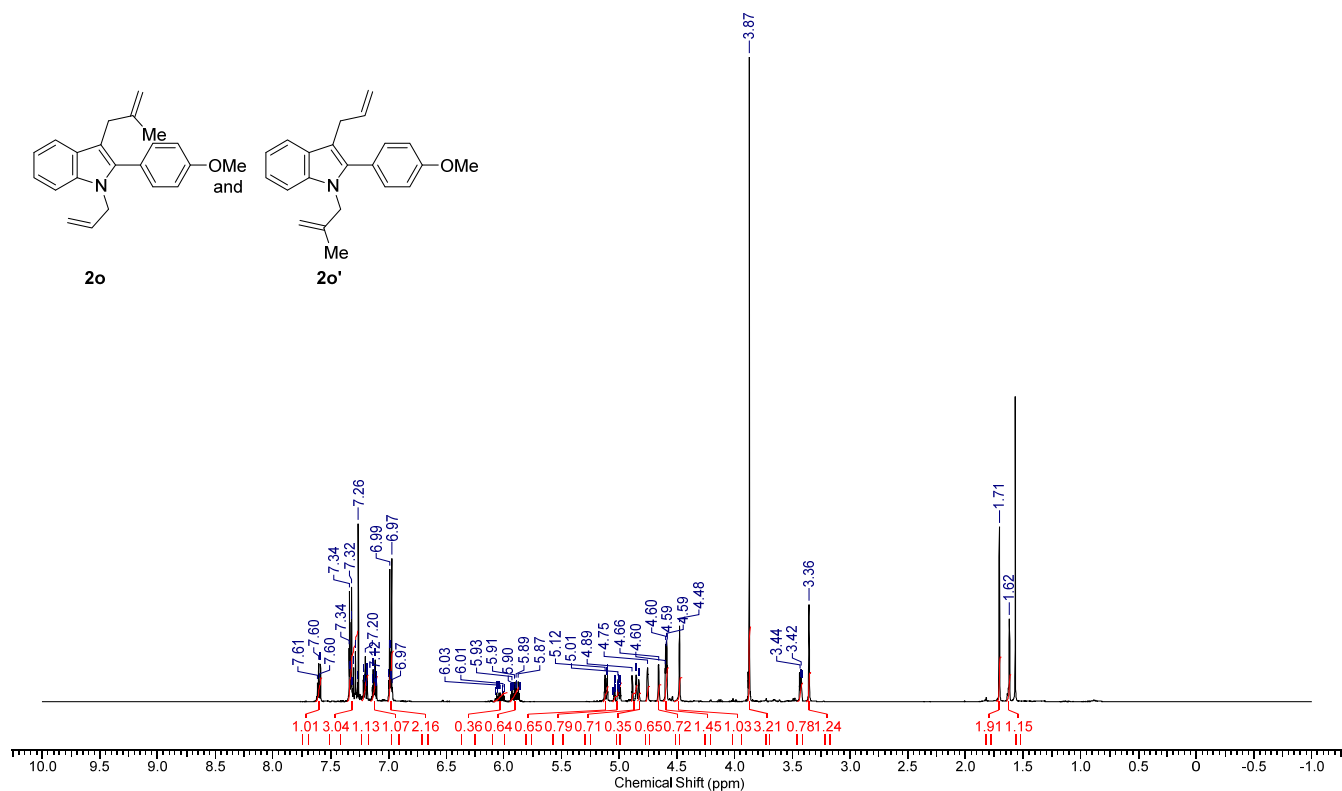

Enlarged view

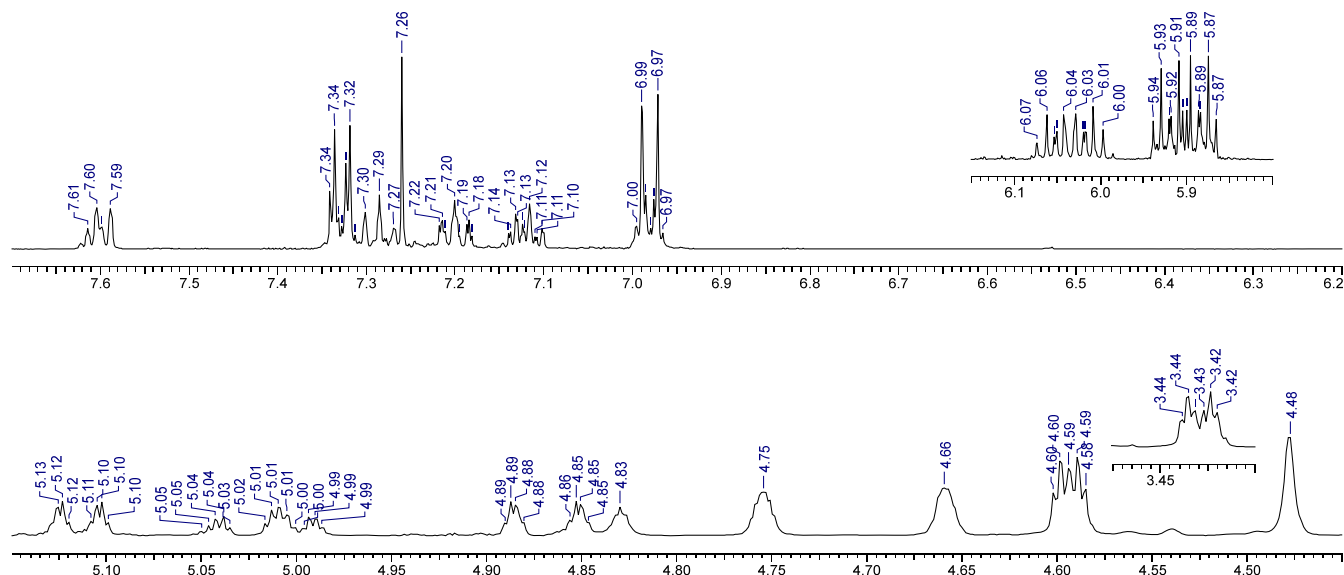

$^{13}\text{C}$  NMR (125 MHz,  $\text{CDCl}_3$ ) of **2o** and **2o'** (**2o**:**2o'** = 64:36)

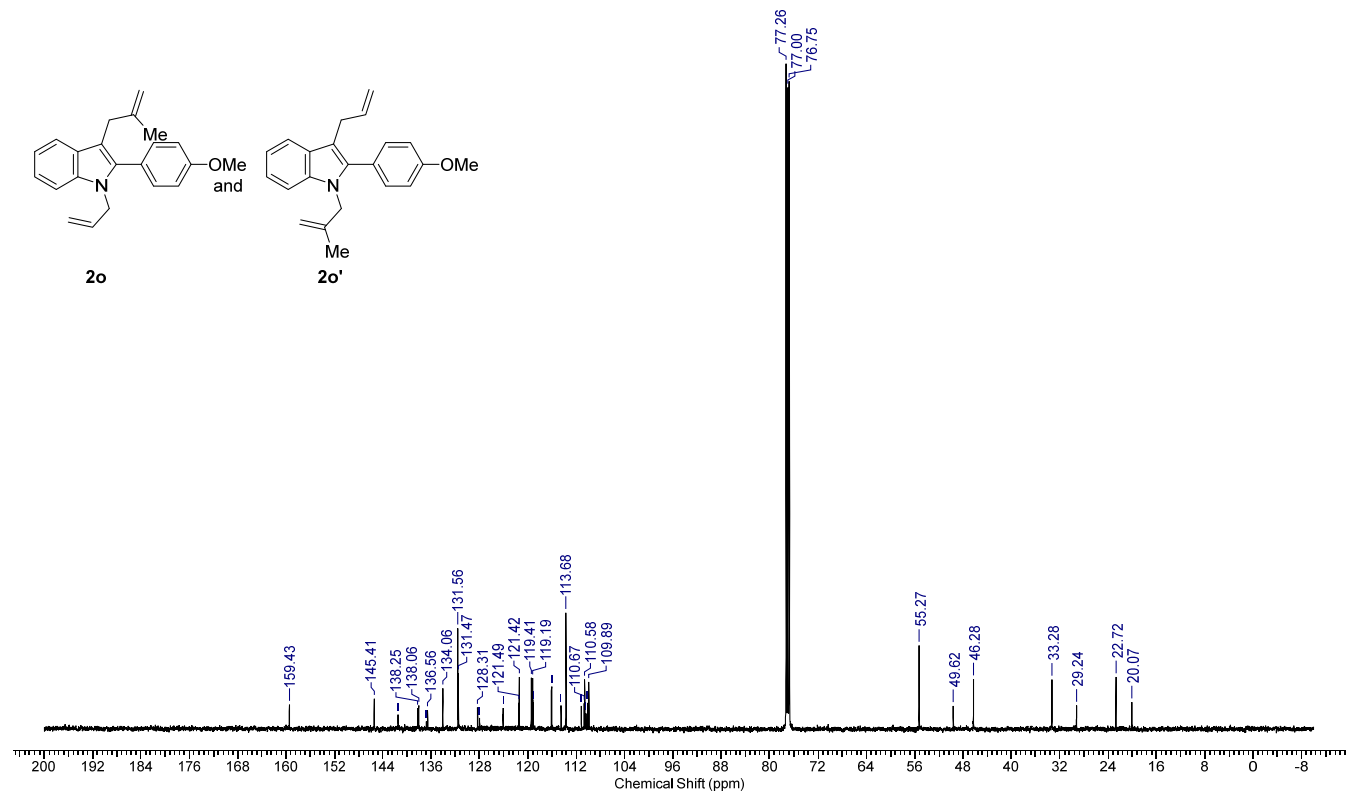

Enlarged view

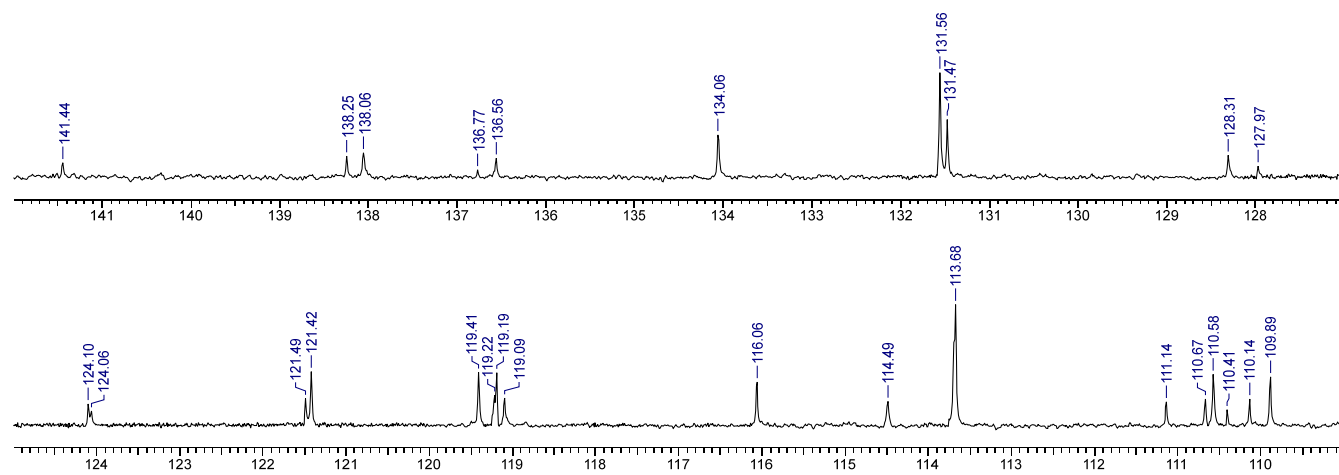

$^1\text{H}$  NMR (500 MHz,  $\text{CDCl}_3$ ) of **2p**, *E*-**4p** and *Z*-**4p** (**2p**:*E*-**4p**:*Z*-**4p** = 73:14:13)

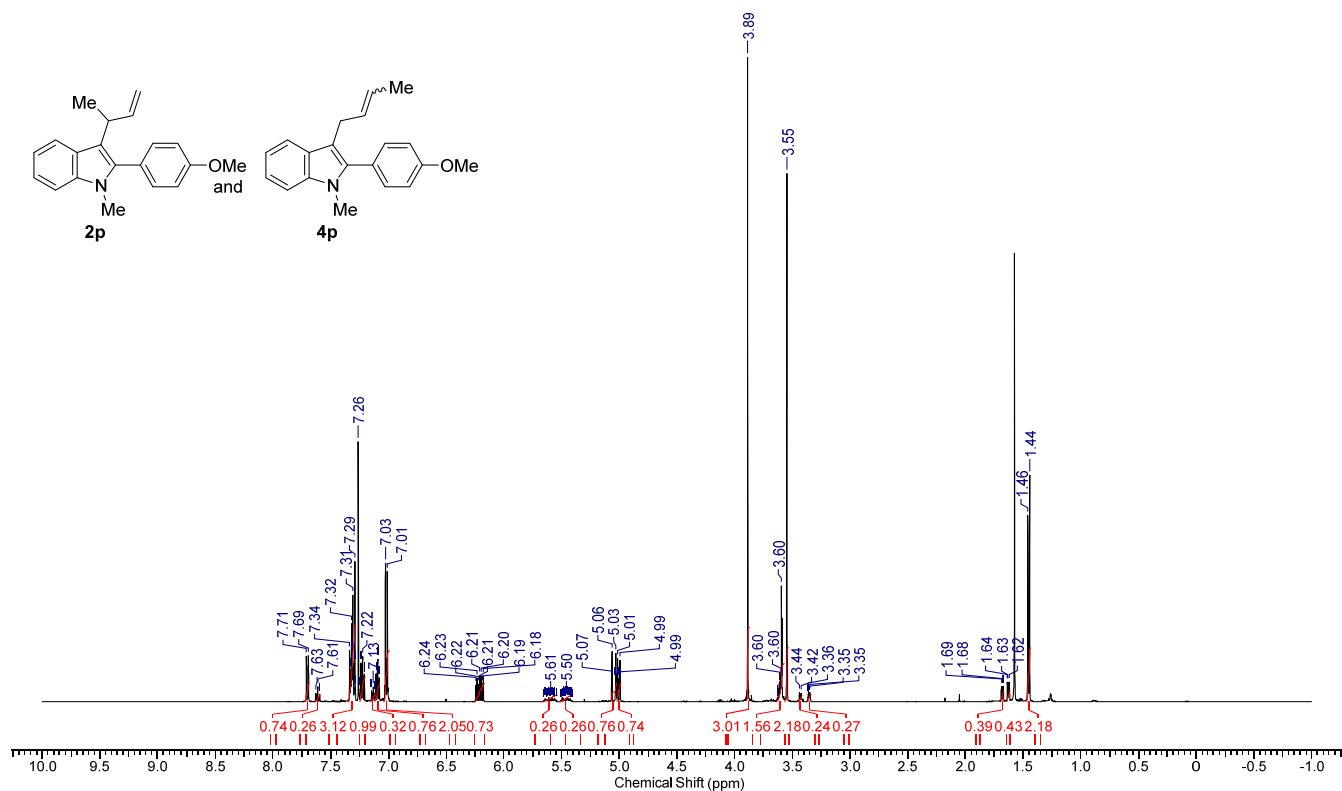

Enlarged view

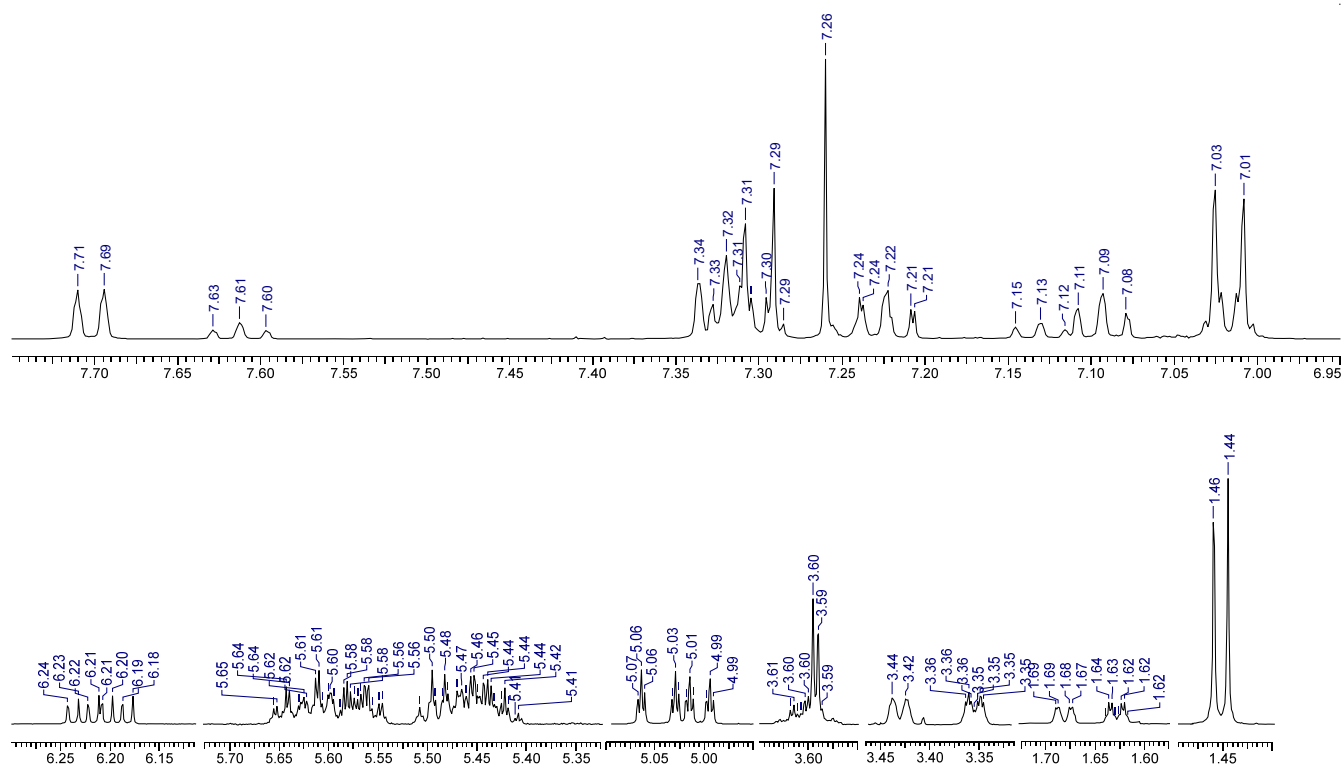

$^{13}\text{C}$  NMR (125 MHz,  $\text{CDCl}_3$ ) of **2p**, *E*-**4p** and *Z*-**4p** (**2p**:*E*-**4p**:*Z*-**4p** = 73:14:13)

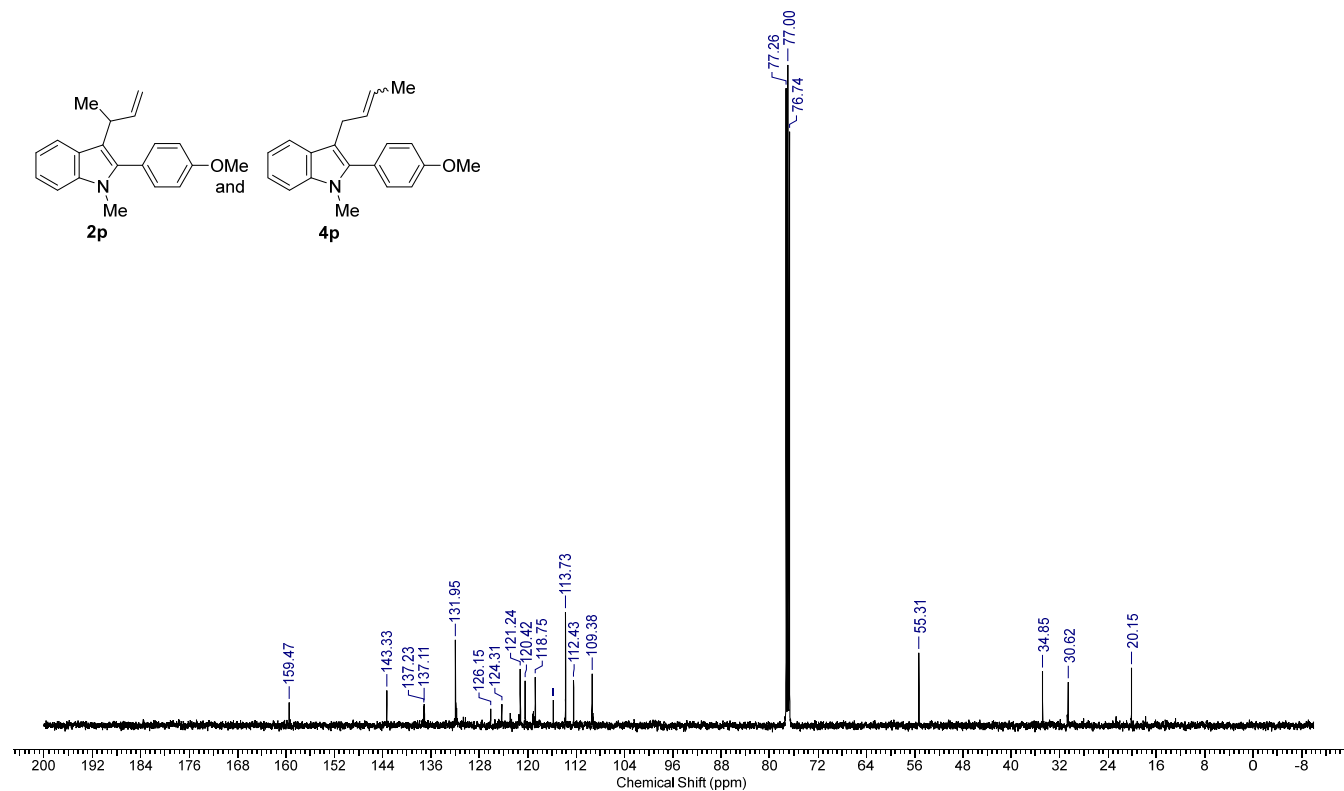

Enlarged view

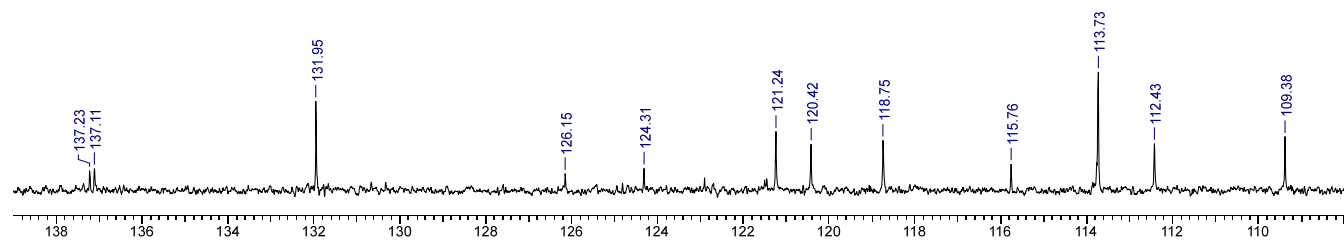



$^1\text{H}$  NMR (500 MHz,  $\text{CDCl}_3$ ) of **2q**

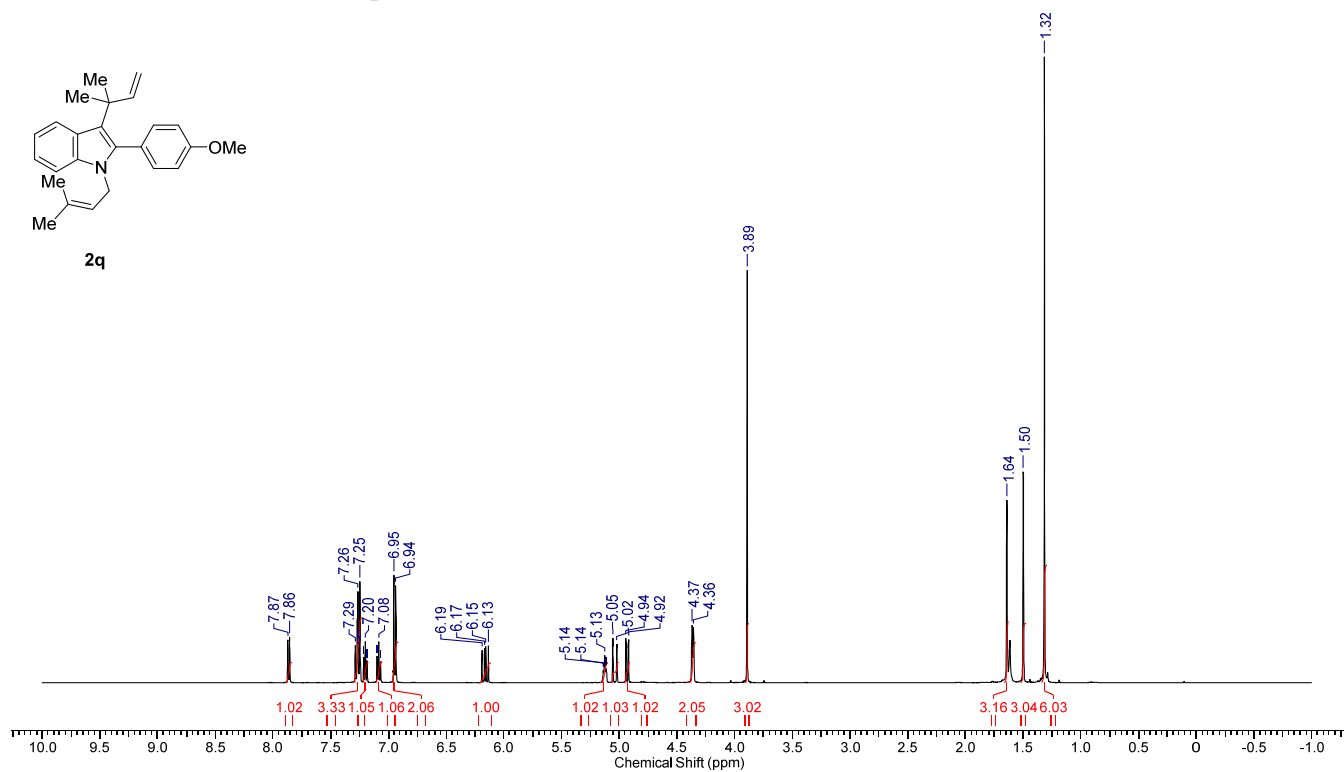

Enlarged view

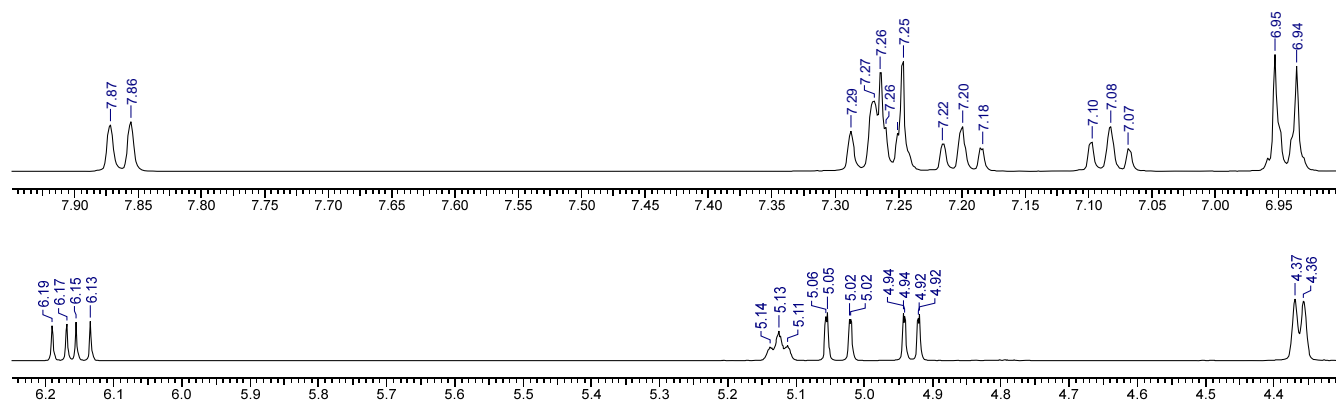

<sup>13</sup>C NMR (125 MHz, CDCl<sub>3</sub>) of **2q**

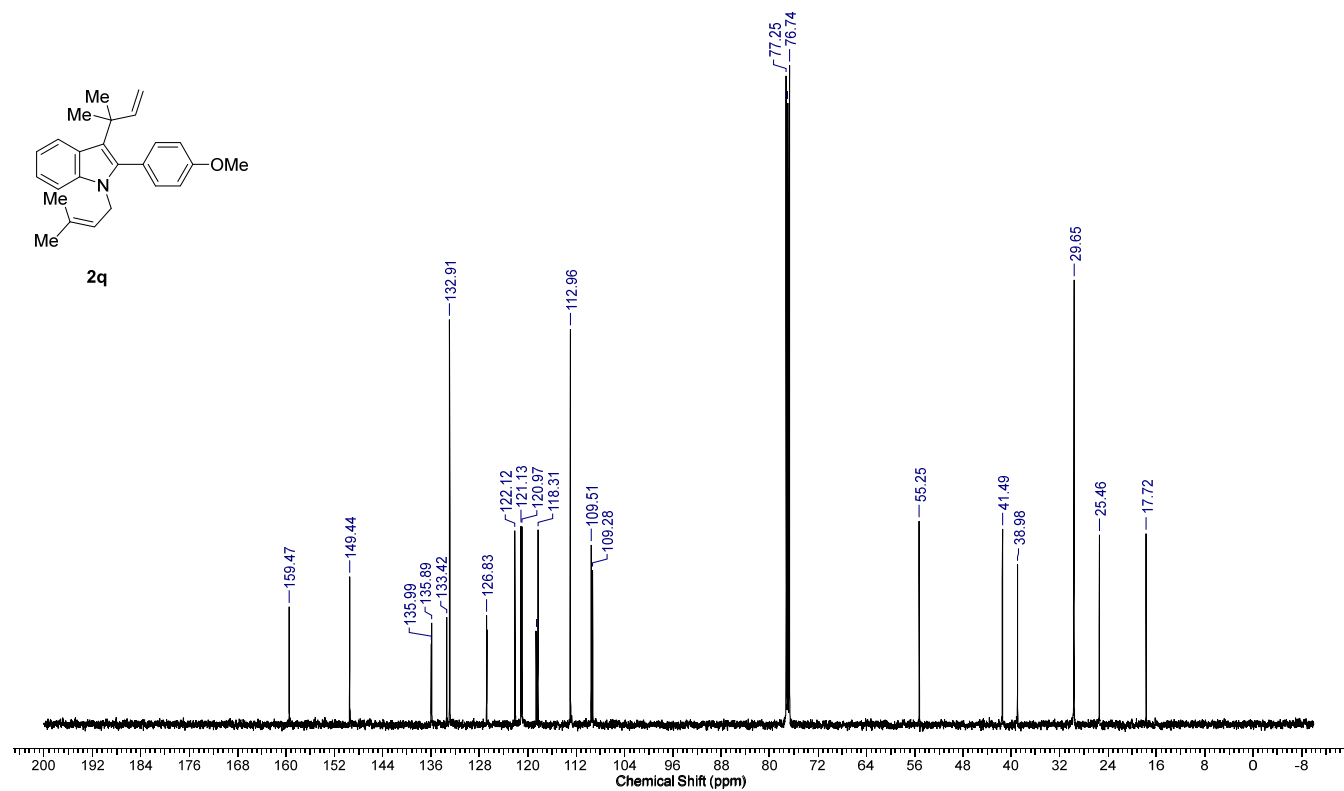

Enlarged view

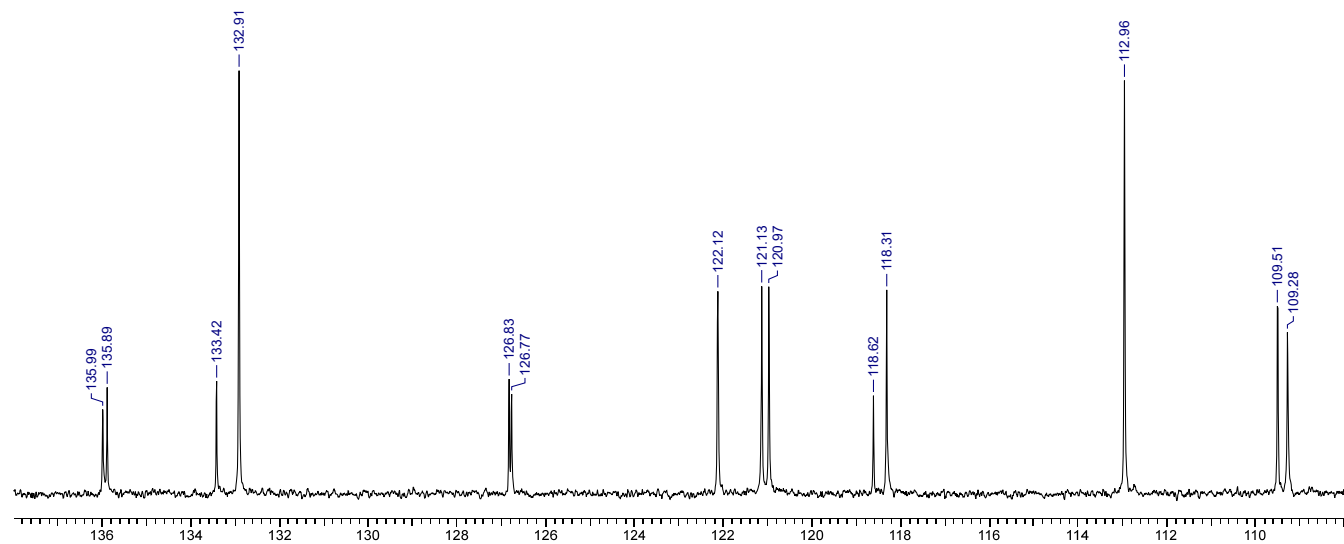

<sup>1</sup>H NMR (500 MHz, CDCl<sub>3</sub>) of **4q**

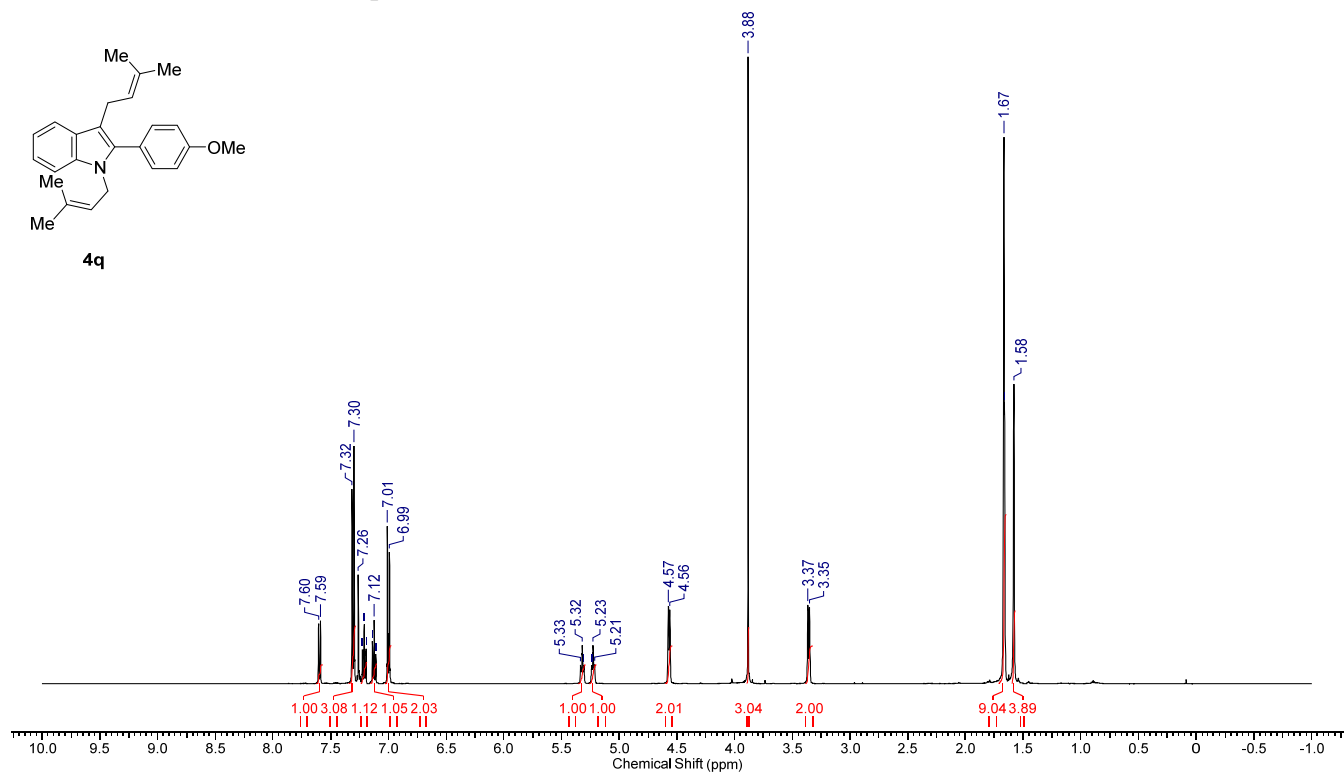

Enlarged view

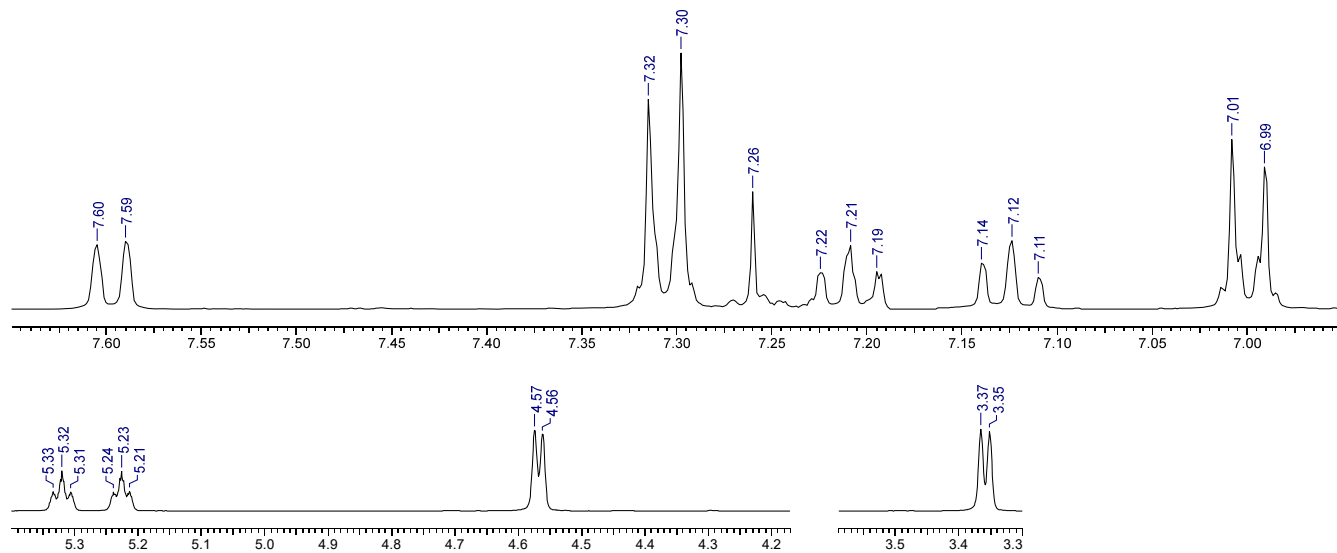

$^{13}\text{C}$  NMR (125 MHz,  $\text{CDCl}_3$ ) of **4q**

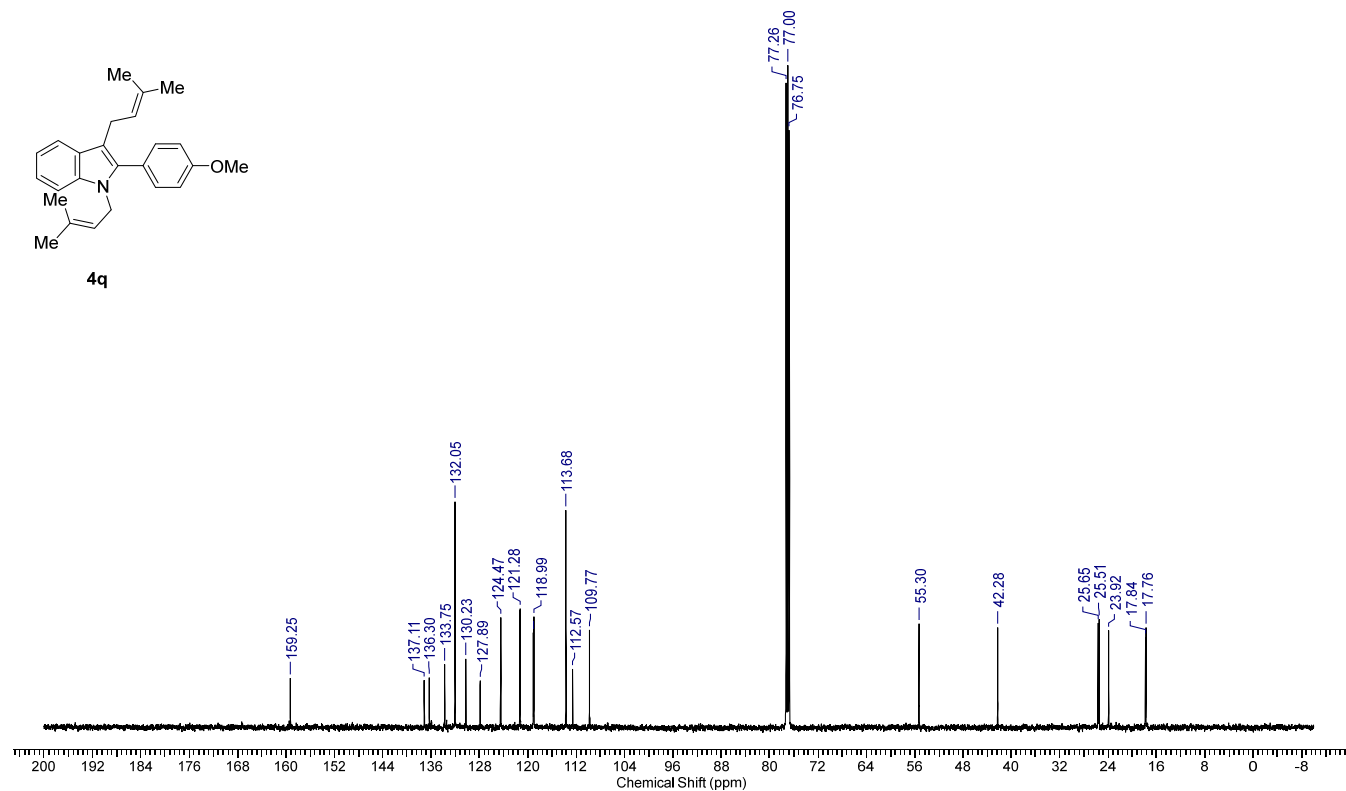

Enlarged view

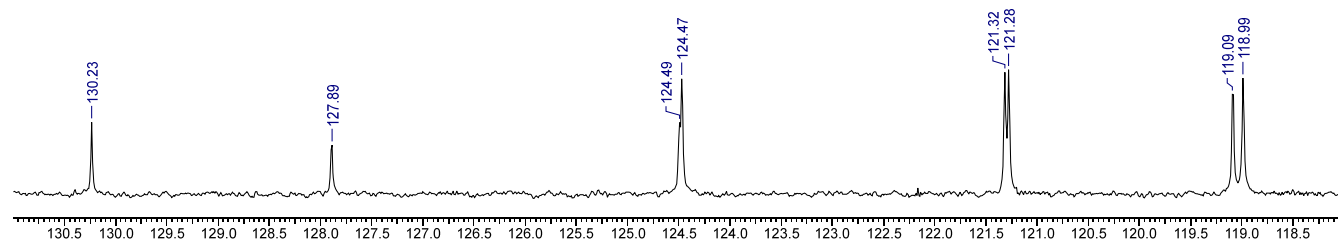

Supplement: d3qo00315a1.pdf [file d3qo00315a1.pdf]
